# Supplementary material for: Exploring the photovoltaic properties of naphthalene-1,5-diamine-based functionalized materials in aprotic polar medium: a combined experimental and DFT approach
Source: Royal Society of Chemistry journal article supplement (doi:10.1039/d4ra03916e), 2024-01-01
Supplement: d4ra03916e1.pdf [file d4ra03916e1.pdf]

## Exploring the Photovoltaic Properties of Naphthalene-1,5-diamine Based Functionalized Materials in Aprotic Polar Medium: A Combine Experimental and DFT Approach

Iqra Shafiq,<sup>1,2</sup> Muhammad Khalid, \*<sup>1,2</sup> Rifat Jawaria<sup>1,2</sup>, Zahid Shafiq,<sup>3</sup> Shahzad Murtaza,<sup>1,2</sup> Ataulpa A. C. Braga,<sup>4</sup>

<sup>1</sup>Institute of Chemistry, Khwaja Fareed University of Engineering & Information Technology, Rahim Yar Khan, 64200, Pakistan

<sup>2</sup>Centre for Theoretical and Computational Research, Khwaja Fareed University of Engineering & Information Technology, Rahim Yar Khan, 64200, Pakistan

<sup>3</sup>Institute of Chemical Sciences, Bahauddin Zakariya University, Multan 60800, Pakistan

<sup>4</sup>Departamento de Química Fundamental, Instituto de Química, Universidade de São Paulo, Av. Prof. Lineu Prestes, 748, São Paulo, 05508-000, Brazil

\*Corresponding author's E-mail addresses:

Dr. Muhammad Khalid ([muhammad.khalid@kfueit.edu.pk](mailto:muhammad.khalid@kfueit.edu.pk); [Khalid@iq.usp.br](mailto:Khalid@iq.usp.br)).

**Table S1:** Calculated vibrational frequencies of ND1

| <i>Frequencies</i> | <i>Experimental</i> | <i>Intensities</i> | <i>Vibrational assignments</i>                                                                                                                                                                                                                                                                      |
|--------------------|---------------------|--------------------|-----------------------------------------------------------------------------------------------------------------------------------------------------------------------------------------------------------------------------------------------------------------------------------------------------|
| 3239               |                     | 2                  | $\nu(\text{C-H})$                                                                                                                                                                                                                                                                                   |
| 3236               |                     | 8                  | $\nu(\text{s})+(\text{as})\text{C-H}_{\text{Ben}}$                                                                                                                                                                                                                                                  |
| 3229               |                     | 10                 | $\nu(\text{s})\text{C-H}_{\text{Ben}}$                                                                                                                                                                                                                                                              |
| 3212               |                     | 17                 | $\nu(\text{s})+\nu(\text{as})\text{C-H}_{\text{Ben}}$                                                                                                                                                                                                                                               |
| 3197               |                     | 23                 | $\nu(\text{as})\text{C-H}_{\text{Ben}}$                                                                                                                                                                                                                                                             |
| 3041               | 2861                | 26                 | $\nu(\text{C-H})$                                                                                                                                                                                                                                                                                   |
| 1723               |                     | 15                 | $\nu(\text{C}=\text{N})$                                                                                                                                                                                                                                                                            |
| 1719               |                     | 200                | $\beta(\text{C-H})+\nu(\text{C}=\text{N})$                                                                                                                                                                                                                                                          |
| 1678               |                     | 40                 | $\nu(\text{C}=\text{C}-\text{C}=\text{C}_{\text{Ben}})+(\delta+\rho)\text{C-H}_{\text{Ben}}+\nu(\text{C}-\text{C}_{\text{CF}_3})$                                                                                                                                                                   |
| 1659               |                     | 22                 | $\nu(\text{C}=\text{C}-\text{C}=\text{C}_{\text{Ben}})+(\delta+\rho)\text{C-H}_{\text{Ben}}+\nu(\text{C}-\text{C}_{\text{CF}_3})$                                                                                                                                                                   |
| 1641               | 1617                | 19                 | $\nu(\text{C}=\text{C}-\text{C}=\text{C}_{\text{Ben}})+(\delta+\rho)\text{C-H}_{\text{Ben}}$                                                                                                                                                                                                        |
| 1561               |                     | 25                 | $\nu(\text{C}=\text{C}-\text{C}=\text{C}_{\text{Ben}})+(\delta+\rho)\text{C-H}_{\text{Ben}}$                                                                                                                                                                                                        |
| 1530               |                     | 14                 | $\nu(\text{C}=\text{C}-\text{C}=\text{C}_{\text{Ben}})+(\rho)\text{C-H}_{\text{Ben}}$                                                                                                                                                                                                               |
| 1495               |                     | 19                 | $\nu(\text{C}=\text{C}-\text{C}=\text{C}_{\text{Ben}})+(\rho)\text{C-H}_{\text{Ben}}$                                                                                                                                                                                                               |
| 1453               |                     | 50                 | $\nu(\text{C}=\text{C}-\text{C}=\text{C}_{\text{Ben}})+(\delta+\rho)\text{C-H}_{\text{Ben}}$                                                                                                                                                                                                        |
| 1367               |                     | 13                 | $\nu(\text{C}=\text{C}-\text{C}=\text{C}_{\text{Ben}})+(\delta+\rho)\text{C-H}_{\text{Ben}}$                                                                                                                                                                                                        |
| 1357               |                     | 228                | $\nu(\text{C}=\text{C}-\text{C}=\text{C}_{\text{Ben}})+\nu(\rho)\text{C-H}_{\text{Ben}}+\nu(\text{C}-\text{C}_{\text{CF}_3})$<br>$\nu(\text{C}=\text{C}-\text{C}=\text{C}_{\text{Ben}})+\nu(\rho)\text{C-H}_{\text{Ben}}+\nu(\text{C}-\text{C}_{\text{CF}_3})+\nu(\text{C}-\text{F}_{\text{CF}_3})$ |
| 1356               |                     | 308                |                                                                                                                                                                                                                                                                                                     |
| 1307               | 1320                | 114                | $\nu(\text{C}=\text{C}-\text{C}=\text{C}_{\text{Ben}})+\nu(\rho)\text{C-H}_{\text{Ben}}+\nu(\text{C}-\text{C}_{\text{CF}_3})$                                                                                                                                                                       |
| 1250               | 1272                | 24                 | $\nu(\rho+\delta)\text{C-H}_{\text{Ben}}+\nu(\text{C-H})$                                                                                                                                                                                                                                           |

|      |      |     |                                                                    |
|------|------|-----|--------------------------------------------------------------------|
| 1232 |      | 42  | $\nu(\rho)C-H_{Ben}+\nu(C-H)+\nu(C-C_{CF3})+\nu(C-F_{CF3})$        |
| 1231 |      | 211 | $\nu(\rho+\delta)C-H_{Ben}+\nu(C-H)+\nu(C-C_{CF3})+\nu(C-F_{CF3})$ |
| 1214 |      | 390 | $\nu(\rho+\delta)C-H_{Ben}+\nu(C-C_{CF3})+\nu(C-F_{CF3})$          |
| 1189 |      | 108 | $\nu(\rho+\delta)C-H_{Ben}+\beta(C-H)$                             |
| 1181 | 1152 | 307 | $\nu(\rho+\delta)C-H_{Ben}+\nu(C-C_{CF3})+\nu(C-F_{CF3})$          |
| 1123 | 1115 | 39  | $\nu(\rho+\delta)C-H_{Ben}+\nu(C-F_{CF3})$                         |
| 1098 | 1086 | 62  | $\nu(\rho)C-H_{Ben}+\nu(C-F_{CF3})+\nu(C-C)$                       |
| 1015 |      | 10  | $\nu(\tau+\gamma)C-H_{Ben}+\gamma(C-H)$                            |
| 1014 |      | 19  | $\nu(\tau+\gamma)C-H_{Ben}+\gamma(C-H)+(\rho)C-H_{Ben}$            |
| 967  | 961  | 28  | $\nu(\rho)C-H_{Ben}+\nu(\tau+\gamma)C-H_{Ben}$                     |
| 947  | 912  | 42  | $\nu(\delta+\rho)C-H_{Ben}+\nu(C-C)$                               |
| 822  | 892  | 31  | $\nu(\tau+w)C-H_{Ben}+\nu(\rho)C-H$                                |
| 812  | 799  | 77  | $\nu(\tau+w)C-H_{Ben}+\nu(C-F_{CF3})$                              |
| 717  | 782  | 28  | $\nu(\tau+w)C-H_{Ben}+\nu(C-F_{CF3})$                              |
| 694  | 692  | 48  | $\nu(\rho)C-H_{Ben}+(\rho)C-H+\nu(C-F_{CF3})$                      |
| 666  | 674  | 8   | $\nu(w)C-H_{CF3}+\nu(C-H_{Ben})$                                   |

Frequencies are given in  $cm^{-1}$ ,  $\nu$ =stretching,  $\beta$ =in-plane bending,  $\gamma$ =out-plane bending,  $\delta$ =scissoring,  $\rho$ =rocking,  $w$ =wagging,  $s$ =symmetric,  $as$ =asymmetric,  $\tau$ =twisting, Ben=benzene ring

**Table S2:** Calculated vibrational frequencies of ND2

| <i>Frequencies</i> | <i>Experimental</i> | <i>Intensities</i> | <i>Vibrational assignments</i>                          |
|--------------------|---------------------|--------------------|---------------------------------------------------------|
| 3238               |                     | 7                  | $\nu(C-H)$                                              |
| 3235               |                     | 7                  | $\nu(s)(C-H)$                                           |
| 3233               |                     | 6                  | $\nu(s)(C-H)$                                           |
| 3216               |                     | 13                 | $\nu(s)+\nu(as)C-H_{Ben}$                               |
| 3212               |                     | 18                 | $\nu(s)+\nu(as)C-H_{Ben}$                               |
| 3196               |                     | 24                 | $\nu(as)C-H_{Ben}$                                      |
| 3042               | 3054                | 33                 | $\nu(C-H)$                                              |
| 1721               |                     | 7                  | $\nu(C=N)+\nu(C=C-C=C_{Ben})$                           |
| 1717               |                     | 314                | $\nu(C=N)+\nu(C=C-C=C_{Ben})$                           |
| 1677               |                     | 28                 | $\nu(C=N)+\nu(C=C-C=C_{Ben})+(\rho)C-H_{Ben}$           |
| 1656               |                     | 54                 | $\nu(C=N)+\nu(C=C-C=C_{Ben})+(\rho)C-H_{Ben}+\nu(C-Cl)$ |
| 1641               | 1613                | 23                 | $\nu(C=N)+\nu(C=C-C=C_{Ben})+(\delta+\rho)C-H_{Ben}$    |
| 1562               | 1573                | 24                 | $\nu(C=C-C=C_{Ben})+(\delta+\rho)C-H_{Ben}$             |
| 1531               |                     | 22                 | $\nu(C=C-C=C_{Ben})+(\delta+\rho)C-H_{Ben}+\nu(C-Cl)$   |
| 1530               |                     | 70                 | $\nu(C=C-C=C_{Ben})+(\delta+\rho)C-H_{Ben}+\nu(C-Cl)$   |
| 1496               |                     | 122                | $\nu(C=C-C=C_{Ben})+(\delta+\rho)C-H_{Ben}+\nu(C-Cl)$   |
| 1453               | 1444                | 42                 | $\nu(C=C-C=C_{Ben})+(\delta+\rho)C-H_{Ben}+\nu(C-Cl)$   |
| 1406               |                     | 12                 | $\beta(C-H)+\nu(C=C-C=C_{Ben})+(\delta+\rho)C-H_{Ben}$  |
| 1404               | 1401                | 36                 | $\beta(C-H)+\nu(C=C-C=C_{Ben})+(\delta+\rho)C-H_{Ben}$  |
| 1366               | 1356                | 39                 | $\nu(C=C-C=C_{Ben})+(\delta+\rho)C-H_{Ben}$             |
| 1306               |                     | 96                 | $\nu(C=C-C=C_{Ben})+(\delta+\rho)C-H_{Ben}+\nu(C-Cl)$   |
| 1298               |                     | 74                 | $\nu(C=C-C=C_{Ben})+(\rho)C-H_{Ben}$                    |

|      |      |    |                                                                                                                                                        |
|------|------|----|--------------------------------------------------------------------------------------------------------------------------------------------------------|
| 1277 | 1259 | 38 | $\nu(\text{C}=\text{C}-\text{C}=\text{C}_{\text{Ben}})+(\rho)\text{C}-\text{H}_{\text{Ben}}$                                                           |
| 1247 | 1229 | 8  | $\nu(\text{C}=\text{C}-\text{C}=\text{C}_{\text{Ben}})+(\delta+\rho)\text{C}-\text{H}_{\text{Ben}}$                                                    |
| 1188 |      | 16 | $\nu(\text{C}=\text{C}-\text{C}=\text{C}_{\text{Ben}})+(\delta+\rho)\text{C}-\text{H}_{\text{Ben}}$                                                    |
| 1163 |      | 30 | $\nu(\text{C}=\text{C}-\text{C}=\text{C}_{\text{Ben}})+(\delta+\rho)\text{C}-\text{H}_{\text{Ben}}+\nu(\text{C}-\text{Cl})$                            |
| 1157 | 1126 | 9  | $\nu(\text{C}=\text{C}-\text{C}=\text{C}_{\text{Ben}})+(\delta+\rho)\text{C}-\text{H}_{\text{Ben}}+\nu(\text{C}-\text{Cl})$                            |
| 1098 |      | 19 | $\nu(\text{C}=\text{C}-\text{C}=\text{C}_{\text{Ben}})+(\rho)\text{C}-\text{H}_{\text{Ben}}$                                                           |
| 1011 |      | 9  | $\gamma(\text{C}-\text{H})+(\tau+\rho)\text{C}-\text{H}_{\text{Ben}}$                                                                                  |
| 999  |      | 13 | $\gamma(\text{C}-\text{H})+(\tau+\rho)\text{C}-\text{H}_{\text{Ben}}$                                                                                  |
| 960  | 967  | 67 | $\nu(\text{C}=\text{C}-\text{C}=\text{C}_{\text{Ben}})+(\beta)\text{C}-\text{H}_{\text{Ben}}+(\rho)\text{C}-\text{H}_{\text{Ben}}$                     |
| 910  | 918  | 9  | $\nu(\text{C}=\text{C}-\text{C}=\text{C}_{\text{Ben}})+(\tau+w)\text{C}-\text{H}_{\text{Ben}}+\gamma(\text{C}-\text{H})$                               |
| 823  | 898  | 65 | $\nu(\text{C}=\text{C}-\text{C}=\text{C}_{\text{Ben}})+(w)\text{C}-\text{H}_{\text{Ben}}+\nu(\text{C}-\text{Cl})$                                      |
|      | 872  |    | $\nu(\text{C}=\text{C}-\text{C}=\text{C}_{\text{Ben}})+(w)\text{C}-\text{H}_{\text{Ben}}+(\rho)\text{C}-\text{H}_{\text{Ben}}+\nu(\text{C}-\text{Cl})$ |
| 805  |      | 59 |                                                                                                                                                        |
| 791  | 774  | 57 | $\nu(\text{C}=\text{C}-\text{C}=\text{C}_{\text{Ben}})+(\rho)\text{C}-\text{H}_{\text{Ben}}+\gamma(\text{C}-\text{Cl})$                                |
| 701  |      | 18 | $\nu(\text{C}=\text{C}-\text{C}=\text{C}_{\text{Ben}})+(w)\text{C}-\text{H}_{\text{Ben}}$                                                              |
| 692  | 695  | 11 | $\nu(\text{C}=\text{C}-\text{C}=\text{C}_{\text{Ben}})+(w)\text{C}-\text{H}_{\text{Ben}}$                                                              |

Frequencies are given in  $\text{cm}^{-1}$ ,  $\nu$ =stretching,  $\beta$ =in-plane bending,  $\gamma$ =out-plane bending,  $\delta$ =scissoring,  $\rho$ =rocking,  $w$ =wagging,  $s$ =symmetric,  $as$ =asymmetric,  $\tau$ =twisting, Ben=benzene ring

**Table S3:** Calculated vibrational frequencies of ND3

| <i>Frequencies</i> | <i>Experimental</i> | <i>Intensities</i> | <i>Vibrational assignments</i>                                                                                              |
|--------------------|---------------------|--------------------|-----------------------------------------------------------------------------------------------------------------------------|
| 3239               |                     | 1                  | $\nu(\text{C}-\text{H})$                                                                                                    |
| 3239               |                     | 5                  | $\nu(\text{C}-\text{H})$                                                                                                    |
| 3236               |                     | 8                  | $\nu(s)(\text{C}-\text{H})$                                                                                                 |
| 321                |                     | 14                 | $\nu(s)+\nu(as)\text{C}-\text{H}_{\text{Ben}}$                                                                              |
| 3212               |                     | 18                 | $\nu(s)+\nu(as)\text{C}-\text{H}_{\text{Ben}}$                                                                              |
| 3197               |                     | 3                  | $\nu(s)+\nu(as)\text{C}-\text{H}_{\text{Ben}}$                                                                              |
| 3197               |                     | 29                 | $\nu(s)+\nu(as)\text{C}-\text{H}_{\text{Ben}}$                                                                              |
| 3041               | 3047                | 39                 | $\nu(\text{C}-\text{H})$                                                                                                    |
| 1721               |                     | 5                  | $\nu(\text{C}=\text{N})+\nu(\text{C}=\text{C}-\text{C}=\text{C}_{\text{Ben}})$                                              |
| 1716               |                     | 316                | $\nu(\text{C}=\text{N})+\nu(\text{C}=\text{C}-\text{C}=\text{C}_{\text{Ben}})+(\rho)\text{C}-\text{H}$                      |
| 1660               |                     | 9                  | $\nu(\text{C}=\text{C}-\text{C}=\text{C}_{\text{Ben}})+(\delta+\rho)\text{C}-\text{H}_{\text{Ben}}$                         |
| 1642               |                     | 15                 | $\nu(\text{C}=\text{C}-\text{C}=\text{C}_{\text{Ben}})+(\delta+\rho)\text{C}-\text{H}_{\text{Ben}}$                         |
| 1633               |                     | 34                 | $\nu(\text{C}=\text{C}-\text{C}=\text{C}_{\text{Ben}})+(\delta+\rho)\text{C}-\text{H}_{\text{Ben}}$                         |
| 1632               | 1611                | 29                 | $\nu(\text{C}=\text{C}-\text{C}=\text{C}_{\text{Ben}})+(\delta+\rho)\text{C}-\text{H}_{\text{Ben}}$                         |
| 1562               |                     | 26                 | $\nu(\text{C}=\text{C}-\text{C}=\text{C}_{\text{Ben}})+(\delta+\rho)\text{C}-\text{H}_{\text{Ben}}$                         |
| 1514               |                     | 42                 | $\nu(\text{C}=\text{C}-\text{C}=\text{C}_{\text{Ben}})+(\delta+\rho)\text{C}-\text{H}_{\text{Ben}}$                         |
| 1470               | 1496                | 41                 | $\nu(\text{C}=\text{C}-\text{C}=\text{C}_{\text{Ben}})+(\delta+\rho)\text{C}-\text{H}_{\text{Ben}}$                         |
| 1451               | 1421                | 38                 | $\nu(\text{C}=\text{C}-\text{C}=\text{C}_{\text{Ben}})+(\rho)\text{C}-\text{H}_{\text{Ben}}+\nu(\text{C}=\text{N})$         |
| 1401               | 1399                | 34                 | $\nu(\text{C}=\text{C}-\text{C}=\text{C}_{\text{Ben}})+(\rho)\text{C}-\text{H}_{\text{Ben}}+(\rho)\text{C}-\text{H}$        |
| 1370               |                     | 12                 | $\nu(\text{C}=\text{C}-\text{C}=\text{C}_{\text{Ben}})+(\delta+\rho)\text{C}-\text{H}_{\text{Ben}}+(\rho)\text{C}-\text{H}$ |
| 1362               |                     | 14                 | $\nu(\text{C}=\text{C}-\text{C}=\text{C}_{\text{Ben}})+(\delta+\rho)\text{C}-\text{H}_{\text{Ben}}+(\rho)\text{C}-\text{H}$ |
| 1302               |                     | 36                 | $\nu(\text{C}=\text{C}-\text{C}=\text{C}_{\text{Ben}})+(\rho)\text{C}-\text{H}_{\text{Ben}}+(\rho)\text{C}-\text{H}$        |

|      |      |     |                                                                                                                                     |
|------|------|-----|-------------------------------------------------------------------------------------------------------------------------------------|
| 1293 |      | 5   | $\nu(\text{C}=\text{C}-\text{C}=\text{C}_{\text{Ben}})+(\rho)\text{C}-\text{H}_{\text{Ben}}$                                        |
| 1252 | 1262 | 28  | $\nu(\text{C}=\text{C}-\text{C}=\text{C}_{\text{Ben}})+\nu(\text{C}=\text{N})+(\delta+\rho)\text{C}-\text{H}_{\text{Ben}}$          |
| 1239 |      | 122 | $\nu(\text{C}=\text{C}-\text{C}=\text{C}_{\text{Ben}})+(\delta+\rho)\text{C}-\text{H}_{\text{Ben}}+(\rho)\text{C}-\text{H}$         |
| 1238 | 1194 | 7   | $\nu(\text{C}=\text{C}-\text{C}=\text{C}_{\text{Ben}})+(\delta+\rho)\text{C}-\text{H}_{\text{Ben}}$                                 |
| 1190 | 1153 | 44  | $\nu(\text{C}=\text{C}-\text{C}=\text{C}_{\text{Ben}})+(\delta+\rho)\text{C}-\text{H}_{\text{Ben}}$                                 |
| 1099 |      | 10  | $\nu(\text{C}=\text{C}-\text{C}=\text{C}_{\text{Ben}})+\beta(\text{C}-\text{H})+(\rho)\text{C}-\text{H}_{\text{Ben}}$               |
| 1097 | 1063 | 22  | $\nu(\text{C}=\text{C}-\text{C}=\text{C}_{\text{Ben}})+(\rho)\text{C}-\text{H}_{\text{Ben}}+\beta(\text{C}-\text{H})$               |
| 1018 |      | 6   | $\nu(\text{C}=\text{C}-\text{C}=\text{C}_{\text{Ben}})+\beta(\text{C}-\text{H})$                                                    |
| 1013 |      | 10  | $\nu(\text{C}=\text{C}-\text{C}=\text{C}_{\text{Ben}})+(\tau+w)\text{C}-\text{H}_{\text{Ben}}+\gamma(\text{C}-\text{H})$            |
| 1012 |      | 10  | $\nu(\text{C}=\text{C}-\text{C}=\text{C}_{\text{Ben}})+(\tau+\gamma)\text{C}-\text{H}_{\text{Ben}}+\gamma(\text{C}-\text{H})$       |
| 964  | 962  | 52  | $\nu(\text{C}=\text{C}-\text{C}=\text{C}_{\text{Ben}})+\beta(\text{C}-\text{H})+(\rho)\text{C}-\text{H}_{\text{Ben}}$               |
| 935  |      | 9   | $(\gamma)\text{C}-\text{H}_{\text{Ben}}+(\rho)\text{C}-\text{H}_{\text{Ben}}$                                                       |
| 932  | 924  | 6   | $(\gamma)\text{C}-\text{H}_{\text{Ben}}+(\rho)\text{C}-\text{H}_{\text{Ben}}$                                                       |
| 930  | 895  | 11  | $\nu(\text{C}=\text{C}-\text{C}=\text{C}_{\text{Ben}})+(\gamma)\text{C}-\text{H}_{\text{Ben}}+(\rho)\text{C}-\text{H}_{\text{Ben}}$ |
| 810  |      | 119 | $(w)\text{C}-\text{H}_{\text{Ben}}+\beta(\text{C}-\text{H})$                                                                        |
| 802  |      | 33  | $(w)\text{C}-\text{H}_{\text{Ben}}+(\gamma)\text{C}-\text{H}$                                                                       |
| 799  | 779  | 14  | $(w+\gamma)\text{C}-\text{H}_{\text{Ben}}+\beta(\text{C}-\text{H})$                                                                 |
| 710  | 713  | 67  | $\nu(\text{C}=\text{C}-\text{C}=\text{C}_{\text{Ben}})+(\rho)\text{C}-\text{H}_{\text{Ben}}+\nu(\text{C}-\text{Br})$                |
| 695  | 677  | 10  | $(w+\gamma)\text{C}-\text{H}_{\text{Ben}}+\nu(\text{C}-\text{Br})$                                                                  |
| 681  | 663  | 8   | $\nu(\text{C}=\text{C}-\text{C}=\text{C}_{\text{Ben}})+(\rho)\text{C}-\text{H}_{\text{Ben}}+\nu(\text{C}-\text{Br})$                |

Frequencies are given in  $\text{cm}^{-1}$ ,  $\nu$ =stretching,  $\beta$ =in-plane bending,  $\gamma$ =out-plane bending,  $\delta$ =scissoring,  $\rho$ =rocking,  $w$ =wagging,  $s$ =symmetric,  $as$ =asymmetric,  $\tau$ =twisting, Ben=benzene ring

**Table S4:** Calculated vibrational frequencies of ND4

| <i>Frequencies</i> | <i>Experimental</i> | <i>Intensities</i> | <i>Vibrational assignments</i>                                                                                                                   |
|--------------------|---------------------|--------------------|--------------------------------------------------------------------------------------------------------------------------------------------------|
| 3235               |                     | 9                  | $\nu(s)(\text{C}-\text{H})$                                                                                                                      |
| 3214               |                     | 2                  | $\nu(\text{C}-\text{H})$                                                                                                                         |
| 3211               |                     | 20                 | $\nu(s)+\nu(as)\text{C}-\text{H}_{\text{Ben}}$                                                                                                   |
| 3197               |                     | 24                 | $\nu(as)\text{C}-\text{H}_{\text{Ben}}$                                                                                                          |
| 3196               |                     | 27                 | $\nu(as)\text{C}-\text{H}_{\text{Ben}}$                                                                                                          |
| 3153               |                     | 11                 | $\nu(s)(as)\text{C}-\text{H}_{\text{CH}_3}$                                                                                                      |
| 3153               |                     | 12                 | $\nu(s)(as)\text{C}-\text{H}_{\text{CH}_3}$                                                                                                      |
| 3120               |                     | 11                 | $\nu(s)(as)\text{C}-\text{H}_{\text{CH}_3}$                                                                                                      |
| 3120               |                     | 10                 | $\nu(s)(as)\text{C}-\text{H}_{\text{CH}_3}$                                                                                                      |
| 3060               |                     | 55                 | $\nu(s)\text{C}-\text{H}_{\text{CH}_3}$                                                                                                          |
| 3037               |                     | 29                 | $\nu(s)\text{C}-\text{H}$                                                                                                                        |
| 3037               |                     | 41                 | $\nu(s)\text{C}-\text{H}$                                                                                                                        |
| 1722               |                     | 12                 | $\nu(\text{C}=\text{N})+\nu(\rho)\text{C}-\text{H}$                                                                                              |
| 1719               |                     | 335                | $\nu(\text{C}=\text{N})+\nu(\rho)\text{C}-\text{H}$                                                                                              |
| 1686               |                     | 33                 | $\nu(\text{C}=\text{C}-\text{C}=\text{C}_{\text{Ben}})+\nu(\delta+\rho)\text{C}-\text{H}_{\text{Ben}}$                                           |
| 1642               |                     | 138                | $\nu(\text{C}=\text{C}-\text{C}=\text{C}_{\text{Ben}})+\nu(\delta+\rho)\text{C}-\text{H}_{\text{Ben}}$                                           |
| 1642               |                     | 31                 | $\nu(\text{C}=\text{C}-\text{C}=\text{C}_{\text{Ben}})+(\delta+\rho)\text{C}-\text{H}_{\text{Ben}}+(\delta+\tau)\text{C}-\text{H}_{\text{CH}_3}$ |
| 1640               |                     | 94                 | $\nu(\text{C}=\text{C}-\text{C}=\text{C}_{\text{Ben}})+(\delta+\rho)\text{C}-\text{H}_{\text{Ben}}+(\delta+\tau)\text{C}-\text{H}_{\text{CH}_3}$ |
| 1635               |                     | 14                 | $\nu(\text{C}=\text{C}-\text{C}=\text{C}_{\text{Ben}})+(\delta+\rho)\text{C}-\text{H}_{\text{Ben}}$                                              |

|      |      |     |                                                                                                                     |
|------|------|-----|---------------------------------------------------------------------------------------------------------------------|
| 1564 | 1567 | 83  | $\nu(\text{C}=\text{C}-\text{C}=\text{C}_{\text{Ben}})+(\delta+\rho)\text{C}-\text{H}_{\text{Ben}}$                 |
| 1557 |      | 25  | $\nu(\text{C}=\text{C}-\text{C}=\text{C}_{\text{Ben}})+(\rho)\text{C}-\text{H}$                                     |
|      |      | 13  | $\nu(\text{C}=\text{C}-\text{C}=\text{C}_{\text{Ben}})+(\rho)\text{C}-\text{H}_{\text{Ben}}+(\delta+\tau)\text{C}-$ |
| 1505 |      |     | $\text{H}_{\text{CH}_3}$                                                                                            |
| 1501 |      | 15  | $(\delta+\tau)\text{C}-\text{H}_{\text{CH}_3}$                                                                      |
| 1497 |      | 10  | $(\delta+\tau)\text{C}-\text{H}_{\text{CH}_3}$                                                                      |
| 1481 |      | 8   | $(\delta+\tau)\text{C}-\text{H}_{\text{CH}_3}$                                                                      |
| 1481 |      | 8   | $(\delta+\tau)\text{C}-\text{H}_{\text{CH}_3}$                                                                      |
|      |      | 11  | $\nu(\text{C}=\text{C}-\text{C}=\text{C}_{\text{Ben}})+(\rho)\text{C}-\text{H}_{\text{Ben}}+(\delta+\tau)\text{C}-$ |
| 1463 |      |     | $\text{H}_{\text{CH}_3}$                                                                                            |
| 1445 |      | 66  | $\nu(\text{C}=\text{C}-\text{C}=\text{C}_{\text{Ben}})+(\rho)\text{C}-\text{H}+\nu(\text{C}-\text{F})$              |
| 1399 | 1398 | 27  | $(\rho)\text{C}-\text{H}$                                                                                           |
|      |      | 33  | $\nu(\text{C}=\text{C}-\text{C}=\text{C}_{\text{Ben}})+\nu(\delta+\rho)\text{C}-$                                   |
| 1358 |      |     | $\text{H}_{\text{Ben}}+(\rho)\text{C}-\text{H}$                                                                     |
| 1321 |      | 27  | $(\rho)\text{C}-\text{H}+\nu(\text{C}-\text{F})$                                                                    |
|      |      | 200 | $\nu(\text{C}=\text{C}-\text{C}=\text{C}_{\text{Ben}})+\nu(\rho)\text{C}-\text{H}_{\text{Ben}}+(\rho)\text{C}-$     |
| 1320 |      |     | $\text{H}+\nu(\text{C}-\text{F})$                                                                                   |
| 1300 |      | 14  | $\nu(\text{C}=\text{C}-\text{C}=\text{C}_{\text{Ben}})+\nu(\rho)\text{C}-\text{H}_{\text{Ben}}$                     |
| 1300 |      | 14  | $\nu(\text{C}=\text{C}-\text{C}=\text{C}_{\text{Ben}})+\nu(\rho)\text{C}-\text{H}_{\text{Ben}}$                     |
| 1293 |      | 122 | $\nu(\text{C}=\text{C}-\text{C}=\text{C}_{\text{Ben}})+\nu(\rho)\text{C}-\text{H}_{\text{Ben}}$                     |
| 1247 | 1262 | 15  | $\nu(\text{C}=\text{C}-\text{C}=\text{C}_{\text{Ben}})+\nu(\delta+\rho)\text{C}-\text{H}_{\text{Ben}}$              |
| 1224 | 1234 | 39  | $(w)\text{C}-\text{H}_{\text{CH}_3}$                                                                                |
| 1193 |      | 32  | $\nu(\text{C}=\text{C}-\text{C}=\text{C}_{\text{Ben}})+\nu(\delta+\rho)\text{C}-\text{H}_{\text{Ben}}$              |
|      |      | 21  | $\nu(\text{C}=\text{C}-\text{C}=\text{C}_{\text{Ben}})+\nu(\delta+\rho)\text{C}-$                                   |
| 1139 |      |     | $\text{H}_{\text{Ben}}+(\nu)(\text{C}-\text{F})$                                                                    |
|      | 1113 | 25  | $\nu(\text{C}=\text{C}-\text{C}=\text{C}_{\text{Ben}})+\nu(\delta+\rho)\text{C}-$                                   |
| 1136 |      |     | $\text{H}_{\text{Ben}}+(\nu)(\text{C}-\text{F})$                                                                    |
|      |      | 18  | $\nu(\text{C}=\text{C}-\text{C}=\text{C}_{\text{Ben}})+(\rho)\text{C}-\text{H}_{\text{Ben}}+\beta(\text{C}-$        |
| 1099 |      |     | $\text{H}_{\text{Ben}})$                                                                                            |
| 1059 |      | 4   | $(\delta+\tau)\text{C}-\text{H}_{\text{CH}_3}$                                                                      |
| 1022 |      | 46  | $(\gamma)\text{C}-\text{H}_{\text{CH}_3}$                                                                           |
| 1012 |      | 11  | $(\gamma)\text{C}-\text{H}_{\text{CH}_3}$                                                                           |
| 978  |      | 37  | $(\gamma+\tau)\text{C}-\text{H}_{\text{CH}_3}$                                                                      |
| 968  |      | 12  | $(\gamma+\tau)\text{C}-\text{H}_{\text{CH}_3}$                                                                      |
|      |      | 60  | $\nu(\text{C}=\text{N})+\nu(\text{C}=\text{C}-\text{C}=\text{C}_{\text{Ben}})+(\gamma+\rho)\text{C}-$               |
| 955  |      |     | $\text{H}_{\text{Ben}}$                                                                                             |
| 885  | 874  | 18  | $(\gamma)\text{C}-\text{H}$                                                                                         |
| 884  | 823  | 14  | $(\gamma)\text{C}-\text{H}$                                                                                         |
| 852  |      | 18  | $(w)\text{C}-\text{H}_{\text{Ben}}$                                                                                 |
| 850  |      | 18  | $\nu(\text{C}=\text{C}-\text{C}=\text{C}_{\text{Ben}})+(w)\text{C}-\text{H}_{\text{Ben}}$                           |
| 812  |      | 40  | $(\nu)(\text{C}-\text{F})$                                                                                          |
| 807  |      | 93  | $\nu(\text{C}=\text{C}-\text{C}=\text{C}_{\text{Ben}})+(w)\text{C}-\text{H}_{\text{Ben}}$                           |
| 800  | 796  | 17  | $\nu(\text{C}=\text{C}-\text{C}=\text{C}_{\text{Ben}})+(\tau)\text{C}-\text{H}_{\text{Ben}}$                        |
| 754  | 778  | 8   | $\nu(\text{C}=\text{C}-\text{C}=\text{C}_{\text{Ben}})+(w)\text{C}-\text{H}_{\text{Ben}}$                           |
| 641  | 604  | 8   | $\nu(\text{C}=\text{C}-\text{C}=\text{C}_{\text{Ben}})+(w)\text{C}-\text{H}_{\text{Ben}}$                           |

Frequencies are given in  $\text{cm}^{-1}$ ,  $\nu$ =stretching,  $\beta$ =in-plane bending,  $\gamma$ =out-plane bending,  $\delta$ =scissoring,  $\rho$ =rocking,  $w$ =wagging,  $s$ =symmetric,  $as$ =asymmetric,  $\tau$ =twisting, Ben=benzene ring

**Table S5:** Calculated vibrational frequencies of ND5

| <i>Frequencies</i> | <i>Experimental</i> | <i>Intensities</i> | <i>Vibrational assignments</i> |
|--------------------|---------------------|--------------------|--------------------------------|
|--------------------|---------------------|--------------------|--------------------------------|

|      |      |     |                                                                                                              |
|------|------|-----|--------------------------------------------------------------------------------------------------------------|
| 3239 |      | 3   | $\nu(\text{s})(\text{C-H})$                                                                                  |
| 3236 |      | 8   | $\nu(\text{s})(\text{C-H})$                                                                                  |
| 3216 |      | 1   | $\nu(\text{C-H})$                                                                                            |
| 3213 |      | 17  | $\nu(\text{s})+\nu(\text{as})\text{C-H}_{\text{Ben}}$                                                        |
| 3197 |      | 24  | $\nu(\text{s})+\nu(\text{as})\text{C-H}_{\text{Ben}}$                                                        |
| 3043 |      | 30  | $\nu(\text{C-H})$                                                                                            |
| 3043 |      | 36  | $\nu(\text{C-H})$                                                                                            |
| 1721 |      | 10  | $\nu(\text{C=N})$                                                                                            |
| 1717 |      | 251 | $\nu(\text{C=N})+\nu(\text{C=C-C=C}_{\text{Ben}})+(\rho)\text{C-H}$                                          |
| 1672 |      | 9   | $\nu(\text{C=C-C=C}_{\text{Ben}})+\nu(\delta+\rho)\text{C-H}_{\text{Ben}}$                                   |
| 1671 |      | 18  | $\nu(\text{C=C-C=C}_{\text{Ben}})+\nu(\delta+\rho)\text{C-H}_{\text{Ben}}$                                   |
| 164  |      | 31  | $\nu(\text{C=C-C=C}_{\text{Ben}})+\nu(\delta+\rho)\text{C-H}_{\text{Ben}}$                                   |
| 1642 |      | 138 | $\nu(\text{C=C-C=C}_{\text{Ben}})+\nu(\delta+\rho)\text{C-H}_{\text{Ben}}$                                   |
| 1641 |      | 62  | $\nu(\text{C=C-C=C}_{\text{Ben}})+\nu(\delta+\rho)\text{C-H}_{\text{Ben}}$                                   |
|      | 1613 | 9   | $\nu(\text{C=C-C=C}_{\text{Ben}})+\nu(\delta+\rho)\text{C-H}_{\text{Ben}}+\nu(\text{C=N})$                   |
| 1633 |      |     |                                                                                                              |
| 1562 | 1567 | 45  | $\nu(\text{C=C-C=C}_{\text{Ben}})+\nu(\delta+\rho)\text{C-H}_{\text{Ben}}$                                   |
| 1538 |      | 34  | $\nu(\text{C=C-C=C}_{\text{Ben}})+(\rho)\text{C-H}_{\text{Ben}}$                                             |
| 1537 |      | 189 | $\nu(\text{C=C-C=C}_{\text{Ben}})+(\rho)\text{C-H}_{\text{Ben}}$                                             |
| 1504 |      | 4   | $\nu(\text{C=C-C=C}_{\text{Ben}})+\nu(\rho)\text{C-H}_{\text{Ben}}+(\rho)\text{C-H}$                         |
|      | 1474 | 15  | $\nu(\text{C=C-C=C}_{\text{Ben}})+\nu(\rho)\text{C-H}_{\text{Ben}}+(\rho)\text{C-H}+\nu(\text{C-Cl})$        |
| 1476 |      |     |                                                                                                              |
|      |      | 30  | $\nu(\text{C=C-C=C}_{\text{Ben}})+\nu(\rho)\text{C-H}_{\text{Ben}}+(\rho)\text{C-H}+\nu(\text{C-Cl})$        |
| 1470 |      |     |                                                                                                              |
|      |      | 7   | $\nu(\text{C=C-C=C}_{\text{Ben}})+\nu(\delta+\rho)\text{C-H}_{\text{Ben}}+(\rho)\text{C-H}+\nu(\text{C-Cl})$ |
| 1449 |      |     |                                                                                                              |
| 1444 | 1416 | 50  | $\nu(\text{C=C-C=C}_{\text{Ben}})+(\rho)\text{C-H}_{\text{Ben}}$                                             |
| 1397 |      | 43  | $(\rho)\text{C-H}$                                                                                           |
| 1395 |      | 3   | $(\rho)\text{C-H}$                                                                                           |
| 1372 |      | 26  | $\nu(\text{C=C-C=C}_{\text{Ben}})+\nu(\delta+\rho)\text{C-H}_{\text{Ben}}$                                   |
|      |      | 11  | $\nu(\text{C=C-C=C}_{\text{Ben}})+\nu(\delta+\rho)\text{C-H}_{\text{Ben}}+(\rho)\text{C-H}$                  |
| 1355 |      |     |                                                                                                              |
| 1326 |      | 23  | $\nu(\text{C=C-C=C}_{\text{Ben}})+(\rho)\text{C-H}+\nu(\text{C-Cl})$                                         |
| 1325 |      | 209 | $\nu(\text{C=C-C=C}_{\text{Ben}})+(\rho)\text{C-H}+\nu(\text{C-Cl})$                                         |
| 1295 | 1288 | 167 | $\nu(\text{C=C-C=C}_{\text{Ben}})+(\rho)\text{C-H}+\nu(\text{C-Cl})$                                         |
| 1272 |      | 14  | $\nu(\text{C=C-C=C}_{\text{Ben}})+(\rho)\text{C-H}+\nu(\text{C-Cl})$                                         |
| 1272 |      | 49  | $\nu(\text{C=C-C=C}_{\text{Ben}})+(\rho)\text{C-H}+\nu(\text{C-Cl})$                                         |
| 1248 | 1233 | 11  | $\nu(\text{C=C-C=C}_{\text{Ben}})+\nu(\delta+\rho)\text{C-H}_{\text{Ben}}$                                   |
|      |      | 17  | $\nu(\text{C=C-C=C}_{\text{Ben}})+\nu(\delta+\rho)\text{C-H}_{\text{Ben}}+(\rho)\text{C-H}$                  |
| 1197 |      |     |                                                                                                              |
|      |      | 4   | $\nu(\text{C=C-C=C}_{\text{Ben}})+\nu(\delta+\rho)\text{C-H}_{\text{Ben}}+(\rho)\text{C-H}+\nu(\text{C-Cl})$ |
| 1187 |      |     |                                                                                                              |
| 1185 |      | 7   | $\nu(\text{C=C-C=C}_{\text{Ben}})+\nu(\delta+\rho)\text{C-H}_{\text{Ben}}$                                   |
| 1160 |      | 5   | $\nu(\text{C=C-C=C}_{\text{Ben}})+\nu(\delta+\rho)\text{C-H}_{\text{Ben}}$                                   |
| 1100 |      | 16  | $\nu(\text{C=C-C=C}_{\text{Ben}})+\nu(\delta+\rho)\text{C-H}_{\text{Ben}}$                                   |
|      |      | 164 | $\nu(\text{C=C-C=C}_{\text{Ben}})+\nu(\delta)\text{C-H}_{\text{Ben}}+\beta(\text{C-H})+\nu(\text{C-Cl})$     |
| 1087 |      |     |                                                                                                              |
|      | 1052 | 12  | $\nu(\text{C=C-C=C}_{\text{Ben}})+\nu(\delta)\text{C-H}_{\text{Ben}}+\beta(\text{C-H})+\nu(\text{C-Cl})$     |
| 1087 |      |     |                                                                                                              |
| 1011 |      | 8   | $(\gamma)\text{C-H}$                                                                                         |
| 1011 |      | 10  | $(\gamma)\text{C-H}$                                                                                         |

|     |     |    |                                                               |
|-----|-----|----|---------------------------------------------------------------|
| 993 |     | 3  | $(\tau)C-H+(\gamma)C-H$                                       |
|     |     | 63 | $\nu(C=C-C=C_{Ben})+\nu(\rho)C-H_{Ben}+\beta(C-H)+\nu(C-Cl)$  |
| 988 |     | 21 | $\nu(C=C-C=C_{Ben})+\nu(\rho)C-H_{Ben}+\beta(C-H)+\nu(C-Cl)$  |
| 982 | 969 | 72 | $\nu(C=C-C=C_{Ben})+\nu(\rho)C-H_{Ben}+\gamma(C-H)+\nu(C-Cl)$ |
| 960 |     |    |                                                               |
| 886 | 920 | 22 | $(\gamma)C-H_{Ben}$                                           |
| 885 | 874 | 17 | $(\gamma)C-H_{Ben}$                                           |
| 850 |     | 19 | $(w)C-H_{Ben}$                                                |
| 849 |     | 19 | $(w)C-H_{Ben}$                                                |
| 811 | 813 | 42 | $\nu(C-Cl)$                                                   |
| 843 |     | 1  | $\tau(C-Cl)$                                                  |
| 808 |     | 93 | $\nu(C=C-C=C_{Ben})+(w)C-H_{Ben}$                             |
| 800 | 774 | 15 | $\nu(C=C-C=C_{Ben})+(\tau)C-H_{Ben}$                          |
| 755 | 695 | 10 | $(w)C-H_{Ben}$                                                |
| 641 | 608 | 10 | $\nu(C=C-C=C_{Ben})+(w)C-H_{Ben}$                             |

Frequencies are given in  $cm^{-1}$ ,  $\nu$ =stretching,  $\beta$ =in-plane bending,  $\gamma$ =out-plane bending,  $\delta$ =scissoring,  $\rho$ =rocking,  $w$ =wagging,  $s$ =symmetric,  $as$ =asymmetric,  $\tau$ =twisting, Ben=benzene ring

**Table S6:** Calculated vibrational frequencies of compound **ND6**

| DFT Freq. ( $cm^{-1}$ ) | XRD  | Intensities ( $Km/mol$ ) | Vibrational assignments                                                         |
|-------------------------|------|--------------------------|---------------------------------------------------------------------------------|
| 3696.48                 |      | 31                       | $\nu(N-H_{Pyr})$                                                                |
| 3696.47                 |      | 381                      | $\nu(N-H_{Pyr})$                                                                |
| 3308.0                  | 3365 | 42                       | $\nu(C-H_{Pyr})$                                                                |
| 3231.34                 |      | 22                       | $\nu_s(C-H_{Ben})$                                                              |
| 3223.95                 |      | 15                       | $\nu_s(C-H_{Ben})$                                                              |
| 3223.94                 |      | 47                       | $\nu_s(C-H_{Ben})$                                                              |
| 3212.5                  |      | 30                       | $\nu_s+\nu_{as}(C-H_{Ben})$                                                     |
| 3209.2                  |      | 8                        | $\nu_s+\nu_{as}(C-H_{Ben})$                                                     |
| 3209.1                  |      | 9                        | $\nu_s+\nu_{as}(C-H_{Ben})$                                                     |
| 3197.90                 |      | 39                       | $\nu_{as}(C-H_{Ben})$                                                           |
| 3194.63                 |      | 6                        | $\nu_s+\nu_{as}(C-H_{Ben})$                                                     |
| 3194.63                 |      | 12                       | $\nu_s+\nu_{as}(C-H_{Ben})$                                                     |
| 3043.59                 |      | 66                       | $\nu(C-H)$                                                                      |
| 3043.50                 |      | 80                       | $\nu(C-H)$                                                                      |
| 1700.17                 |      | 30                       | $\nu(C-N)+\rho(C-H)$                                                            |
| 1695.32                 |      | 926                      | $\nu(C-N)+\rho(C-H)$                                                            |
| 1675.12                 |      | 5                        | $\nu(C=C-C=C_{Ben})+\delta(C-H_{Ben})+\rho(C-H_{Pyr})+\rho(N-H_{Pyr})$          |
| 1674.3                  |      | 99                       | $\nu(C=C-C=C_{Ben})+\delta(C-H_{Ben})+\rho(C-H_{Pyr})+\rho(N-H_{Pyr})+\nu(C-N)$ |
| 1636.7                  |      | 41                       | $\nu(C=C-C=C_{Ben})+\rho+\delta(C-H_{Ben})$                                     |
| 1626.13                 | 1612 | 312                      | $\nu(C=C-C=C_{Ben})+\delta(C-H_{Ben})+\rho(C-H_{Pyr})+\rho(N-H_{Pyr})$          |
| 1560.6                  |      | 24                       | $\nu(C=C-C=C_{Ben})+\rho+\delta(C-H_{Ben})+\rho(N-H_{Pyr})$                     |
| 1554.1                  |      | 13                       | $\nu(C-N_{Pyr})+\rho(C-H)$                                                      |
| 1552.05                 |      | 12                       | $\nu(C=C-C=C_{Ben})+\rho+\delta(C-H_{Ben})+\nu(C-$                              |

|         |      |      |                                                                                                                                |
|---------|------|------|--------------------------------------------------------------------------------------------------------------------------------|
| 1546.29 |      | 10   | $N_{Pyr} + \rho(N-H_{Pyr}) + \delta(C-H_{Pyr})$<br>$\nu(C=C-C=C_{Ben}) + \rho(C-H_{Ben}) + \nu(C-N_{Pyr}) + \delta(C-H_{Pyr})$ |
| 1543.6  |      | 263  | $\nu(C=C-C=C_{Ben}) + \rho + \delta(C-H_{Ben}) + \nu(C-N_{Pyr}) + \rho(N-H_{Pyr}) + \delta(C-H_{Pyr})$                         |
| 1482.8  |      | 74   | $\nu(C=C-C=C_{Ben}) + \rho(C-H_{Ben}) + \nu(C-N_{Pyr})$                                                                        |
| 1481.8  |      | 21   | $\nu(C=C-C=C_{Ben}) + \rho(C-H_{Ben}) + \nu(C-N_{Pyr}) + \rho(N-H_{Pyr})$                                                      |
| 1473.67 |      | 219  | $\nu(C=C-C=C_{Ben}) + \rho(C-H_{Ben}) + \nu(C-N_{Pyr}) + \rho(N-H_{Pyr}) + \nu(C-H_{Pyr})$                                     |
| 1448.79 |      | 130  | $\nu(C=C-C=C_{Ben}) + \rho(C-H_{Ben}) + \nu(C-N)$                                                                              |
| 1445.29 |      | 8    | $\nu(C=C-C=C_{Ben}) + \rho + \delta(C-H_{Ben})$                                                                                |
| 1408.48 | 1429 | 61   | $\rho(C-H)$                                                                                                                    |
| 1406.64 |      | 116  | $\rho(C-H)$                                                                                                                    |
| 1400.99 |      | 87.9 | $\nu(C=C-C=C_{Ben}) + \rho + \delta(C-H_{Ben}) + \nu(C-N_{Pyr}) + \rho(N-H_{Pyr}) + \rho(C-H_{Pyr})$                           |
| 1400.75 |      | 84.4 | $\nu(C=C-C=C_{Ben}) + \rho + \delta(C-H_{Ben}) + \nu(C-N_{Pyr}) + \rho(N-H_{Pyr}) + \rho(C-H_{Pyr})$                           |
| 1362.54 | 1336 | 15   | $\nu(C=C-C=C_{Ben}) + \rho + \delta(C-H_{Ben})$                                                                                |
| 1304.34 |      | 59   | $\nu(C=C-C=C_{Ben}) + \rho + \delta(C-H_{Ben}) + \nu(C-N_{Pyr}) + \rho(N-H_{Pyr})$                                             |
| 1297.16 |      | 127  | $\nu(C=C-C=C_{Ben}) + \rho(C-H_{Ben}) + \nu(C-N_{Pyr}) + \rho(N-H_{Pyr})$                                                      |
| 1264.07 |      | 74   | $\nu(C=C-C=C_{Ben}) + \rho(C-H_{Ben}) + \nu(C-N_{Pyr}) + \rho(N-H_{Pyr}) + \rho(C-H_{Pyr})$                                    |
| 1241.61 |      | 18   | $\nu(C=C-C=C_{Ben}) + \rho(C-H_{Ben}) + \rho(N-H_{Pyr}) + \rho(C-H_{Pyr})$                                                     |
| 1239.45 |      | 37   | $\rho(C-H) + \rho(N-H_{Pyr}) + \rho(C-H_{Pyr})$                                                                                |
| 1193.03 |      | 73   | $\delta(C-H_{Ben})$                                                                                                            |
| 1182.67 |      | 52   | $\delta(C-H_{Ben})$                                                                                                            |
| 1141.87 |      | 301  | $\delta(C-H_{Ben}) + \rho(N-H_{Pyr}) + \delta(C-H)_{Pyr}$                                                                      |
| 1141.63 |      | 11   | $\delta(C-H_{Ben}) + \rho(N-H_{Pyr}) + \delta(C-H)_{Pyr}$                                                                      |
| 1115.40 |      | 33   | $\delta(C-H_{Ben}) + \rho(N-H_{Pyr}) + \rho(C-H)_{Pyr}$                                                                        |
| 1115.25 | 1108 | 27   | $\delta(C-H_{Ben}) + \rho(N-H_{Pyr}) + \rho(C-H)_{Pyr}$                                                                        |
| 1096.86 |      | 18   | $\rho(C-H_{Ben})$                                                                                                              |
| 1091.03 |      | 36   | $\rho(C-H_{Ben})$                                                                                                              |
| 1090.42 |      | 8    | $\rho(C-H_{Ben})$                                                                                                              |
| 1049.17 |      | 42   | $\delta(C-H_{Ben})$                                                                                                            |
| 1049.08 |      | 9.8  | $\delta(C-H_{Ben})$                                                                                                            |
| 1015.13 |      | 11   | $\gamma(C-H) + \tau(C-H_{Ben})$                                                                                                |
| 1014.40 |      | 42   | $\gamma(C-H) + \tau(C-H_{Ben})$                                                                                                |
| 956     | 966  | 125  | $\nu(C=C-C=C_{Ben}) + \rho + \gamma(C-H_{Ben}) + \nu(C-N)$                                                                     |
| 915.34  | 920  | 22   | $\nu(C-N) + \rho + \gamma(C-H_{Pyr}) + \rho(C-N)$                                                                              |
| 915.25  |      | 26   | $\nu(C-N) + \rho + \gamma(C-H_{Pyr}) + \rho(C-N)$                                                                              |
| 810.43  |      | 59   | $w(C-H_{Ben})$                                                                                                                 |
| 797.54  |      | 29   | $\nu(C=C-C=C_{Ben}) + \tau(C-H_{Ben})$                                                                                         |
| 780.7   | 780  | 158  | $\nu(C=C-C=C_{Ben}) + w(C-H_{Ben}) + w(C-H_{Pyr})$                                                                             |
| 780.6   |      | 190  | $\nu(C=C-C=C_{Ben}) + w(C-H_{Ben}) + w(C-H_{Pyr})$                                                                             |
| 756.8   | 750  | 5.3  | $w(C-H_{Ben})$                                                                                                                 |
| 743.78  |      | 81   | $w(C-H_{Ben})$                                                                                                                 |
| 644.1   |      | 21   | $\nu(C-N) + \gamma(N-H_{Pyr}) + \gamma(C-H_{Pyr})$                                                                             |



|        |     |   |                                                                   |
|--------|-----|---|-------------------------------------------------------------------|
| 641.17 |     | 5 | $\gamma(\text{N-H}_{\text{Pyr}})+\gamma(\text{C-H}_{\text{Pyr}})$ |
| 617.07 | 626 | 5 | $\gamma(\text{N-H}_{\text{Pyr}})+\tau(\text{C-H}_{\text{Pyr}})$   |

Frequencies are given in  $\text{cm}^{-1}$ ,  $\nu$ =stretching,  $\beta$ =in-plane bending,  $\gamma$ =out-plane bending,  $\delta$ =scissoring,  $\rho$ =rocking,  $w$ = wagging,  $s$  =symmetric stretching,  $as$ =asymmetric stretching,  $\tau$ =twisting, Ben=benzene ring.

**Table S7:** Calculated vibrational frequencies of compound **ND7**

| DFT<br>unscaled<br>Freq. ( $\text{cm}^{-1}$ ) | Experimental | Intensities<br>( $\text{Km/mol}$ ) | Vibrational assignments                                                                                                                                            |
|-----------------------------------------------|--------------|------------------------------------|--------------------------------------------------------------------------------------------------------------------------------------------------------------------|
| 3693.56                                       |              | 217                                | $\nu(\text{N-H}_{\text{Pyr}})$                                                                                                                                     |
| 3692.49                                       |              | 229                                | $\nu(\text{N-H}_{\text{Pyr}})$                                                                                                                                     |
| 3288.66                                       |              | 3                                  | $\nu_s(\text{C-H}_{\text{Pyr}})$                                                                                                                                   |
| 3231.77                                       |              | 17                                 | $\nu_s(\text{C-H}_{\text{Ben}})$                                                                                                                                   |
| 3226.98                                       |              | 9                                  | $\nu_s(\text{C-H}_{\text{Ben}})$                                                                                                                                   |
| 3220.85                                       |              | 18                                 | $\nu_s(\text{C-H}_{\text{Ben}})$                                                                                                                                   |
| 3212.04                                       |              | 31                                 | $\nu_s+\nu_{as}(\text{C-H}_{\text{Ben}})$                                                                                                                          |
| 3209.04                                       |              | 6                                  | $\nu_s+\nu_{as}(\text{C-H}_{\text{Ben}})$                                                                                                                          |
| 3197.40                                       |              | 43                                 | $\nu_{as}(\text{C-H}_{\text{Ben}})$                                                                                                                                |
| 3195.64                                       | 3165         | 13                                 | $\nu(\text{C-H}_{\text{Ben}})$                                                                                                                                     |
| 3046.14                                       |              | 25                                 | $\nu(\text{C-H})$                                                                                                                                                  |
| 3045.99                                       |              | 114                                | $\nu(\text{C-H})$                                                                                                                                                  |
| 1708.38                                       |              | 115                                | $\nu(\text{C-N})+\rho(\text{C-H})$                                                                                                                                 |
| 1701.18                                       |              | 707                                | $\nu(\text{C-N})+\rho(\text{C-H})$                                                                                                                                 |
| 1677.41                                       |              | 254                                | $\nu(\text{C=C-C=C}_{\text{Ben}})+\rho+\delta(\text{C-H}_{\text{Ben}})+\nu(\text{C-N}_{\text{Pyr}})+\rho(\text{C-H}_{\text{Pyr}})+\rho(\text{N-H}_{\text{Pyr}})$   |
| 1671.96                                       |              | 32                                 | $\nu(\text{C=C-C=C}_{\text{Ben}})+\rho+\delta(\text{C-H}_{\text{Ben}})$                                                                                            |
| 1665.72                                       |              | 716                                | $\nu(\text{C=C-C=C}_{\text{Ben}})+\rho+\delta(\text{C-H}_{\text{Ben}})+\rho(\text{C-H}_{\text{Pyr}})+\rho(\text{N-H}_{\text{Pyr}})+\nu(\text{C-N})$                |
| 1643.5                                        |              | 7                                  | $\nu(\text{C=C-C=C}_{\text{Ben}})+\delta+\rho(\text{C-H}_{\text{Ben}})+\nu(\text{C-N}_{\text{Pyr}})+\delta(\text{C-H}_{\text{Pyr}})+\rho(\text{N-H}_{\text{Pyr}})$ |
| 1638.8                                        |              | 53                                 | $\nu(\text{C=C-C=C}_{\text{Ben}})+\delta+\rho(\text{C-H}_{\text{Ben}})+\nu(\text{C-N}_{\text{Pyr}})+\delta(\text{C-H}_{\text{Pyr}})+\rho(\text{N-H}_{\text{Pyr}})$ |
| 1636.54                                       | 1603         | 120                                | $\nu(\text{C=C-C=C}_{\text{Ben}})+\rho+\delta(\text{C-H}_{\text{Ben}})$                                                                                            |
| 1565.76                                       | 1570         | 21                                 | $\nu(\text{C=C-C=C}_{\text{Ben}})+\rho+\delta(\text{C-H}_{\text{Ben}})+\nu(\text{C-N}_{\text{Pyr}})+\rho(\text{C-H}_{\text{Pyr}})+\rho(\text{N-H}_{\text{Pyr}})$   |
| 1556.99                                       |              | 210                                | $\nu(\text{C=C-C=C}_{\text{Ben}})+\rho+\delta(\text{C-H}_{\text{Ben}})$                                                                                            |
| 1529.10                                       |              | 47                                 | $\nu(\text{C=C-C=C}_{\text{Ben}})+\rho(\text{C-H}_{\text{Ben}})+\nu(\text{C-N}_{\text{Pyr}})+\rho(\text{N-H}_{\text{Pyr}})+\rho(\text{C-H}_{\text{Pyr}})$          |
| 1527.94                                       |              | 42                                 | $\nu(\text{C=C-C=C}_{\text{Ben}})+\rho(\text{C-H}_{\text{Ben}})+\nu(\text{C-N}_{\text{Pyr}})+\rho(\text{N-H}_{\text{Pyr}})+\rho(\text{C-H}_{\text{Pyr}})$          |
| 1501.78                                       |              | 67                                 | $\rho(\text{C-H}_{\text{Ben}})+\rho(\text{N-H}_{\text{Pyr}})$                                                                                                      |
| 1481.49                                       | 1495         | 54                                 | $\nu(\text{C-N}_{\text{Pyr}})+\rho(\text{C-H}_{\text{Ben}})+\rho(\text{N-H}_{\text{Pyr}})$                                                                         |
| 1476.85                                       |              | 97                                 | $\nu(\text{C-N}_{\text{Pyr}})+\rho(\text{C-H}_{\text{Ben}})+\rho(\text{N-H}_{\text{Pyr}})$                                                                         |
| 1448.45                                       |              | 161                                | $\rho(\text{C-H}_{\text{Ben}})+\rho(\text{N-H}_{\text{Pyr}})+\rho(\text{C-H})$                                                                                     |
| 1413.70                                       |              | 91                                 | $\rho(\text{C-H})$                                                                                                                                                 |
| 1410.41                                       |              | 53                                 | $\rho(\text{C-H})$                                                                                                                                                 |
| 1394.25                                       |              | 140                                | $\nu(\text{C=C-C=C}_{\text{Ben}})+\rho(\text{C-H}_{\text{Ben}})+\rho(\text{N-H}_{\text{Pyr}})+\rho(\text{C-H})$                                                    |

|         |      |     |                                                                                                                                                                    |
|---------|------|-----|--------------------------------------------------------------------------------------------------------------------------------------------------------------------|
| 1389.43 |      | 12  | $\nu(\text{C-N}_{\text{Pyr}})+\rho(\text{C-H}_{\text{Pyr}})+\rho(\text{C-H})$                                                                                      |
| 1368.84 |      | 111 | $\nu(\text{C=C-C=C}_{\text{Ben}})+\rho+\delta(\text{C-H}_{\text{Ben}})+\nu(\text{C-N}_{\text{Pyr}})+\rho(\text{N-H}_{\text{Pyr}})+\delta(\text{C-H}_{\text{Pyr}})$ |
| 1362.33 |      | 80  | $\nu(\text{C=C-C=C}_{\text{Ben}})+\rho+\delta(\text{C-H}_{\text{Ben}})+\nu(\text{C-N}_{\text{Pyr}})+\rho(\text{N-H}_{\text{Pyr}})+\delta(\text{C-H}_{\text{Pyr}})$ |
| 1353.34 |      | 59  | $\nu(\text{C=C-C=C}_{\text{Ben}})+\rho(\text{C-H}_{\text{Ben}})+\rho(\text{N-H}_{\text{Pyr}})+\rho(\text{C-H})$                                                    |
| 1339.79 |      | 205 | $\nu(\text{C=C-C=C}_{\text{Ben}})+\rho(\text{C-H}_{\text{Ben}})+\rho(\text{N-H}_{\text{Pyr}})+\rho(\text{C-H})$                                                    |
| 1313.12 |      | 205 | $\nu(\text{C=C-C=C}_{\text{Ben}})+\rho(\text{C-H}_{\text{Ben}})+\nu(\text{C-N}_{\text{Pyr}})+\rho(\text{N-H}_{\text{Pyr}})+\rho(\text{C-H})$                       |
| 1294.76 |      | 114 | $\nu(\text{C=C-C=C}_{\text{Ben}})+\rho(\text{C-H}_{\text{Ben}})+\nu(\text{C-N}_{\text{Pyr}})+\rho(\text{N-H}_{\text{Pyr}})+\rho(\text{C-H}_{\text{Pyr}})$          |
| 1281.18 | 1294 | 7   | $\nu(\text{C=C-C=C}_{\text{Ben}})+\rho(\text{C-H}_{\text{Ben}})+\rho(\text{N-H}_{\text{Pyr}})+\rho(\text{C-H}_{\text{Pyr}})$                                       |
| 1275.42 |      | 10  | $\rho(\text{C-H}_{\text{Ben}})+\rho(\text{N-H}_{\text{Pyr}})+\rho(\text{C-H}_{\text{Pyr}})+\rho(\text{C-H}_{\text{Ben}})$                                          |
| 1256.17 |      | 60  | $\rho(\text{C-H}_{\text{Ben}})+\rho(\text{N-H}_{\text{Pyr}})+\rho(\text{C-H}_{\text{Pyr}})$                                                                        |
| 1247.12 |      | 7   | $\nu(\text{C=C-C=C}_{\text{Ben}})+\rho+\delta(\text{C-H}_{\text{Ben}})+\rho(\text{N-H}_{\text{Pyr}})+\rho(\text{C-H}_{\text{Pyr}})+\rho(\text{C-H})$               |
| 1241.04 | 1224 | 54  | $\nu(\text{C=C-C=C}_{\text{Ben}})+\rho+\delta(\text{C-H}_{\text{Ben}})$                                                                                            |
| 1179.78 |      | 19  | $\rho+\delta(\text{C-H}_{\text{Ben}})$                                                                                                                             |
| 1174.32 |      | 49  | $\rho+\delta(\text{C-H}_{\text{Ben}})$                                                                                                                             |
| 1160.67 |      | 8   | $\delta(\text{C-H}_{\text{Ben}})$                                                                                                                                  |
| 1153.01 |      | 107 | $\rho+\delta(\text{C-H}_{\text{Ben}})+\rho(\text{N-H}_{\text{Pyr}})$                                                                                               |
| 1139.86 |      | 48  | $\rho+\delta(\text{C-H}_{\text{Ben}})+\rho(\text{N-H}_{\text{Pyr}})+\rho(\text{C-H}_{\text{Pyr}})$                                                                 |
| 1120.91 | 1121 | 66  | $\rho(\text{N-H}_{\text{Pyr}})+\rho(\text{C-H}_{\text{Pyr}})$                                                                                                      |
| 1116.59 |      | 90  | $\rho(\text{N-H}_{\text{Pyr}})+\rho(\text{C-H}_{\text{Pyr}})$                                                                                                      |
| 1094.84 |      | 19  | $\rho(\text{C-H}_{\text{Ben}})+\delta(\text{C-H}_{\text{Pyr}})$                                                                                                    |
| 1094.01 |      | 13  | $\delta(\text{C-H}_{\text{Pyr}})$                                                                                                                                  |
| 1093.82 | 1092 | 26  | $\delta(\text{C-H}_{\text{Pyr}})$                                                                                                                                  |
| 1019.84 |      | 37  | $\gamma(\text{C-H})$                                                                                                                                               |
| 987.21  |      | 11  | $\rho+\gamma(\text{C-H}_{\text{Ben}})$                                                                                                                             |
| 970.22  | 975  | 41  | $\nu(\text{C=C-C=C}_{\text{Ben}})+\rho+\gamma(\text{C-H}_{\text{Ben}})+\rho(\text{C-H}_{\text{Pyr}})$                                                              |
| 955.02  |      | 120 | $\nu(\text{C=C-C=C}_{\text{Ben}})+\rho+\gamma(\text{C-H}_{\text{Ben}})$                                                                                            |
| 931.37  |      | 15  | $\gamma(\text{C-H}_{\text{Ben}})$                                                                                                                                  |
| 923.11  | 923  | 16  | $\tau(\text{C-H}_{\text{Ben}})$                                                                                                                                    |
| 916.35  |      | 15  | $\tau(\text{C-H}_{\text{Pyr}})+\gamma(\text{N-H}_{\text{Pyr}})$                                                                                                    |
| 914.33  |      | 17  | $\gamma(\text{C-H})$                                                                                                                                               |
| 912.81  |      | 9   | $\nu(\text{C-N})+\tau(\text{C-H}_{\text{Pyr}})+\gamma(\text{N-H}_{\text{Pyr}})$                                                                                    |
| 846.7   | 880  | 7   | $w(\text{C-H}_{\text{Ben}})$                                                                                                                                       |
| 834.90  |      | 23  | $w(\text{C-H}_{\text{Ben}})$                                                                                                                                       |
| 832.35  |      | 28  | $w(\text{C-H}_{\text{Ben}})$                                                                                                                                       |
| 826.89  |      | 26  | $w(\text{C-H}_{\text{Ben}})$                                                                                                                                       |
| 806.12  | 805  | 156 | $w(\text{C-H}_{\text{Ben}})$                                                                                                                                       |
| 798.28  |      | 35  | $\nu(\text{C=C-C=C}_{\text{Ben}})+\tau(\text{C-H}_{\text{Ben}})$                                                                                                   |
| 795.68  |      | 9   | $\nu(\text{C=C-C=C}_{\text{Ben}})+\tau(\text{C-H}_{\text{Ben}})$                                                                                                   |
| 788.16  |      | 22  | $w(\text{C-H}_{\text{Pyr}})+\gamma(\text{N-H}_{\text{Pyr}})$                                                                                                       |
| 787.78  | 780  | 12  | $w(\text{C-H}_{\text{Pyr}})+\gamma(\text{N-H}_{\text{Pyr}})$                                                                                                       |
| 745.88  | 764  | 165 | $w(\text{C-H}_{\text{Pyr}})$                                                                                                                                       |

|        |     |    |                                                                                              |
|--------|-----|----|----------------------------------------------------------------------------------------------|
| 745.58 | 724 | 19 | $w(\text{C-H}_{\text{Pyr}})$                                                                 |
| 626.71 |     | 10 | $\gamma(\text{C-H}_{\text{Pyr}})+\gamma(\text{N-H}_{\text{Pyr}})$                            |
| 617.84 | 618 | 22 | $w(\text{C-H}_{\text{Ben}})+\gamma(\text{C-H}_{\text{Pyr}})+\gamma(\text{N-H}_{\text{Pyr}})$ |

Frequencies are given in  $\text{cm}^{-1}$ ,  $\nu$ =stretching,  $\beta$ =in-plane bending,  $\gamma$ =out-plane bending,  $\delta$ =scissoring,  $\rho$ =rocking,  $w$ = wagging,  $s$ =symmetric stretching,  $as$ =asymmetric stretching,  $\tau$ =twisting, Ben=benzene ring.

**Table S8:** Calculated vibrational frequencies of compound ND8

| DFT Freq.<br>( $\text{cm}^{-1}$ ) | Exp  | Intensities<br>( $\text{Km/mol}$ ) | Vibrational assignments                                                                                                                                            |
|-----------------------------------|------|------------------------------------|--------------------------------------------------------------------------------------------------------------------------------------------------------------------|
| 3690.85                           |      | 252                                | $\nu(\text{N-H}_{\text{Pyz}})$                                                                                                                                     |
| 3690.19                           |      | 248                                | $\nu(\text{N-H}_{\text{Pyz}})$                                                                                                                                     |
| 3266.80                           |      | 8                                  | $\nu(\text{C-H}_{\text{Pyz}})$                                                                                                                                     |
| 3232.10                           | 3232 | 16                                 | $\nu_s(\text{C-H}_{\text{Ben}})$                                                                                                                                   |
| 3231.53                           |      | 9                                  | $\nu_s(\text{C-H}_{\text{Ben}})$                                                                                                                                   |
| 3229.20                           |      | 10                                 | $\nu_s(\text{C-H}_{\text{Ben}})$                                                                                                                                   |
| 3213.07                           |      | 29                                 | $\nu_s+\nu_{as}(\text{C-H}_{\text{Ben}})$                                                                                                                          |
| 3206.09                           |      | 7                                  | $\nu_s+\nu_{as}(\text{C-H}_{\text{Ben}})$                                                                                                                          |
| 3198.72                           |      | 37                                 | $\nu_{as}(\text{C-H}_{\text{Ben}})$                                                                                                                                |
| 3052.88                           |      | 51                                 | $\nu(\text{C-H})$                                                                                                                                                  |
| 3052.06                           |      | 76                                 | $\nu(\text{C-H})$                                                                                                                                                  |
| 1713.86                           |      | 95                                 | $\nu(\text{C=C-C=C}_{\text{Ben}})+\rho+\delta(\text{C-H}_{\text{Ben}})+\nu(\text{C-N=N})+\rho(\text{N-H})$                                                         |
| 1706.72                           |      | 404                                | $\nu(\text{C=C-C=C}_{\text{Ben}})+\rho+\delta(\text{C-H}_{\text{Ben}})+\nu(\text{C-N=N})+\rho(\text{N-H})$                                                         |
| 1684.01                           |      | 357                                | $\nu(\text{C=C-C=C}_{\text{Ben}})+\rho+\delta(\text{C-H}_{\text{Ben}})+\rho(\text{N-H})$                                                                           |
| 1673.86                           |      | 443                                | $\nu(\text{C=C-C=C}_{\text{Ben}})+\rho+\delta(\text{C-H}_{\text{Ben}})+\nu(\text{C-N=N}_{\text{pyz}})+\rho(\text{C-H}_{\text{Pyz}})+\rho(\text{N-H}_{\text{Pyz}})$ |
| 1671.70                           |      | 279                                | $\nu(\text{C=C-C=C}_{\text{Ben}})+\rho+\delta(\text{C-H}_{\text{Ben}})+\nu(\text{C-N=N}_{\text{pyz}})+\rho(\text{C-H}_{\text{Pyz}})+\rho(\text{N-H}_{\text{Pyz}})$ |
| 1647.50                           |      | 8                                  | $\nu(\text{C=C-C=C}_{\text{Ben}})+\rho(\text{C-H}_{\text{Ben}})+\nu(\text{C-N=N}_{\text{pyz}})+\rho(\text{C-H}_{\text{Pyz}})+\rho(\text{N-H}_{\text{Pyz}})$        |
| 1643.62                           |      | 63                                 | $\nu(\text{C=C-C=C}_{\text{Ben}})+\rho(\text{C-H}_{\text{Ben}})+\nu(\text{C-N=N}_{\text{pyz}})+\rho(\text{C-H}_{\text{Pyz}})+\rho(\text{N-H}_{\text{Pyz}})$        |
| 1637.54                           | 1605 | 75                                 | $\nu(\text{C=C-C=C}_{\text{Ben}})+\delta+\rho(\text{C-H}_{\text{Ben}})$                                                                                            |
| 1567.72                           | 1572 | 74                                 | $\nu(\text{C=C-C=C}_{\text{Ben}})+\rho(\text{C-H}_{\text{Ben}})+\nu(\text{C-N=N}_{\text{pyz}})+\rho(\text{C-H}_{\text{Pyz}})+\rho(\text{N-H}_{\text{Pyz}})$        |
| 1564.21                           |      | 132                                | $\nu(\text{C=C-C=C}_{\text{Ben}})+\rho(\text{C-H}_{\text{Ben}})+\nu(\text{C-N=N}_{\text{pyz}})+\rho(\text{C-H}_{\text{Pyz}})+\rho(\text{N-H}_{\text{Pyz}})$        |
| 1555.62                           |      | 55                                 | $\nu(\text{C=C-C=C}_{\text{Ben}})+\rho+\delta(\text{C-H}_{\text{Ben}})$                                                                                            |
| 1519.96                           |      | 33                                 | $\nu(\text{C=C-C=C}_{\text{Ben}})+\delta+\rho(\text{C-H}_{\text{Ben}})+\nu(\text{C-N=N}_{\text{pyz}})+\rho(\text{C-H}_{\text{Pyz}})+\rho(\text{N-H}_{\text{Pyz}})$ |
| 1519.52                           | 1500 | 37                                 | $\nu(\text{C=C-C=C}_{\text{Ben}})+\delta+\rho(\text{C-H}_{\text{Ben}})+\nu(\text{C-N=N}_{\text{pyz}})+\rho(\text{C-H}_{\text{Pyz}})+\rho(\text{N-H}_{\text{Pyz}})$ |
| 1484.75                           |      | 10                                 | $\nu(\text{C=C-C=C}_{\text{Ben}})+\delta+\rho(\text{C-H}_{\text{Ben}})+\nu(\text{C-N=N}_{\text{pyz}})+\rho(\text{C-H}_{\text{Pyz}})+\rho(\text{N-H}_{\text{Pyz}})$ |
| 1462.83                           |      | 36                                 | $\nu(\text{C=C-C=C}_{\text{Ben}})+\rho(\text{C-H}_{\text{Ben}})+\nu(\text{C-N=N}_{\text{pyz}})+\rho(\text{C-H}_{\text{Pyz}})+\rho(\text{N-H}_{\text{Pyz}})$        |
| 1454.17                           |      | 17                                 | $\nu(\text{C=C-C=C}_{\text{Ben}})+\rho(\text{C-H}_{\text{Ben}})+\nu(\text{C-N=N}_{\text{pyz}})+\rho(\text{C-H}_{\text{Pyz}})+\rho(\text{N-H}_{\text{Pyz}})$        |

|         |      |     |                                                                                   |
|---------|------|-----|-----------------------------------------------------------------------------------|
|         |      |     | $N=N_{pyz})+\rho(C-H_{pyz})+\rho(N-H_{pyz})$                                      |
| 1446.79 |      | 67  | $v(C=C-C=C_{Ben})+\rho(C-H_{Ben})$                                                |
| 1444.11 |      | 21  | $v(C=C-C=C_{Ben})+\delta+\rho(C-H_{Ben})$                                         |
| 1418.28 |      | 118 | $\rho(C-H)+\rho(N-H_{pyz})$                                                       |
| 1410.78 |      | 6   | $\rho(C-H)+\rho(N-H_{pyz})$                                                       |
| 1394.67 |      | 206 | $v(C=C-C=C_{Ben})+v(C-N=N_{pyz})+\rho(N-H_{pyz})$                                 |
| 1377.98 |      | 32  | $\rho(C-H)$                                                                       |
| 1361.81 | 1360 | 8   | $v(C=C-C=C_{Ben})+\delta+\rho(C-H_{Ben})+\rho(C-H)$                               |
| 1345.56 |      | 96  | $v(C=C-C=C_{Ben})+\rho(C-H_{Ben})+v(C-N=N_{pyz})+\rho(C-H_{pyz})+\rho(N-H_{pyz})$ |
| 1316.38 |      | 39  | $v(C=C-C=C_{Ben})+\rho(C-H_{Ben})+v(C-N=N_{pyz})+\rho(C-H_{pyz})+\rho(N-H_{pyz})$ |
| 1296.20 | 1298 | 59  | $\rho(C-H_{Ben})+\rho(N-H_{pyz})+\rho(C-H_{pyz})$                                 |
| 1278.70 |      | 8   | $\rho(C-H_{Ben})+\rho(N-H_{pyz})+\rho(C-H_{pyz})$                                 |
| 1265.13 |      | 9   | $\rho(C-H_{Ben})+\rho(N-H_{pyz})$                                                 |
| 1260.33 |      | 35  | $\rho(C-H_{Ben})+\rho(N-H_{pyz})$                                                 |
| 1204.72 |      | 9   | $v(C=C-C=C_{Ben})+\delta+\rho(C-H_{Ben})+\rho(C-H)$                               |
| 1189    |      | 12  | $v(C=C-C=C_{Ben})+\rho+\delta(C-H_{Ben})+\rho(C-H_{pyz})$                         |
| 1179.96 |      | 43  | $v(C=C-C=C_{Ben})+\rho+\delta(C-H_{Ben})+\rho(C-H_{pyz})$                         |
| 1173.25 |      | 63  | $\rho+\delta(C-H_{Ben})$                                                          |
| 1163.83 |      | 45  | $\rho+\delta(C-H_{Ben})$                                                          |
| 1156.79 |      | 127 | $\delta(C-H_{Ben})$                                                               |
| 1143.07 | 1142 | 99  | $\rho+\delta(C-H_{Ben})$                                                          |
| 1133.52 |      | 21  | $v(C-N=N_{pyz})+\rho(C-H_{pyz})+\rho(N-H_{pyz})$                                  |
| 1130.27 | 1116 | 30  | $v(C-N=N_{pyz})+\rho(C-H_{pyz})+\rho(N-H_{pyz})$                                  |
| 1095.16 |      | 38  | $\delta(C-H_{Ben})$                                                               |
| 1022.23 | 1056 | 19  | $\gamma(C-H)$                                                                     |
| 1020.51 |      | 31  | $\gamma(C-H)$                                                                     |
| 988.92  |      | 8.2 | $\rho+\gamma(C-H_{Ben})$                                                          |
| 972.80  | 977  | 21  | $\rho+\gamma(C-H_{Ben})$                                                          |
| 964.06  |      | 39  | $v(C-N=N_{pyz})+\rho(C-H_{pyz})+\rho(N-H_{pyz})$                                  |
| 960.37  |      | 81  | $v(C-N=N_{pyz})+\rho(C-H_{pyz})+\rho(N-H_{pyz})$                                  |
| 955.03  | 953  | 116 | $v(C=C-C=C_{Ben})+\rho+\gamma(C-H_{Ben})+v(C-N)+\rho(C-H_{pyz})$                  |
| 942.60  |      | 14  | $\gamma(C-H_{Ben})+\gamma(C-H_{pyz})$                                             |
| 926.73  |      | 16  | $\tau+\gamma(C-H_{Ben})$                                                          |
| 923.53  | 921  | 13  | $\tau+\gamma(C-H_{Ben})$                                                          |
| 876.82  | 881  | 32  | $\gamma(C-H_{pyz})$                                                               |
| 841.63  |      | 35  | $w(C-H_{Ben})$                                                                    |
| 837.96  |      | 36  | $w(C-H_{Ben})$                                                                    |
| 833.04  | 832  | 33  | $w(C-H_{Ben})$                                                                    |
| 807.69  | 811  | 124 | $w(C-H_{Ben})$                                                                    |
| 803.62  |      | 49  | $w(C-H_{Ben})$                                                                    |
| 797.41  |      | 19  | $v(C=C-C=C_{Ben})+\tau(C-H_{Ben})$                                                |
| 781.59  | 788  | 10  | $v(C=C-C=C_{Ben})+w(C-H_{Ben})$                                                   |
| 685.22  | 718  | 48  | $\gamma(C-H_{pyz})+\gamma(N-H_{pyz})$                                             |
| 684.00  |      | 10  | $\gamma(C-H_{pyz})+\gamma(N-H_{pyz})$                                             |
| 679.36  |      | 30  | $\gamma(N-H_{pyz})$                                                               |
| 629.58  | 622  | 52  | $w(C-H_{Ben})+\gamma(C-H_{pyz})+\gamma(N-H_{pyz})$                                |

Frequencies are given in  $\text{cm}^{-1}$ ,  $\nu$ =stretching,  $\beta$ =in-plane bending,  $\gamma$ =out-plane bending,  $\delta$ =scissoring,  $\rho$ =rocking,  $w$ =wagging,  $s$ =symmetric stretching,  $as$ =asymmetric stretching,  $\tau$ =twisting, Ben=benzene ring, Pyr=Pyrole, Pyz=Pyrazole .

**Table S9:** Calculated vibrational frequencies of compound **ND9**

| DFT Freq.<br>( $\text{cm}^{-1}$ ) |      | Intensities<br>( $\text{Km/mol}$ ) | Vibrational assignments                                                                                                                                                          |
|-----------------------------------|------|------------------------------------|----------------------------------------------------------------------------------------------------------------------------------------------------------------------------------|
| 3683.19                           |      | 176                                | $\nu(\text{N-H}_{\text{Pyr}})$                                                                                                                                                   |
| 3683.13                           | 3417 | 183                                | $\nu(\text{N-H}_{\text{Pyr}})$                                                                                                                                                   |
| 3232.61                           |      | 21                                 | $\nu_s(\text{C-H}_{\text{Ben}})$                                                                                                                                                 |
| 3223.77                           |      | 64                                 | $\nu_s(\text{C-H}_{\text{Ben}})$                                                                                                                                                 |
| 3215.86                           |      | 53                                 | $\nu_s(\text{C-H}_{\text{Ben}})$                                                                                                                                                 |
| 3213.84                           |      | 28                                 | $\nu_s+\nu_{as}(\text{C-H}_{\text{Ben}})$                                                                                                                                        |
| 3205.37                           |      | 8                                  | $\nu_s+\nu_{as}(\text{C-H}_{\text{Ben}})$                                                                                                                                        |
| 3205.37                           |      | 11                                 | $\nu_s+\nu_{as}(\text{C-H}_{\text{Ben}})$                                                                                                                                        |
| 3199.64                           |      | 41                                 | $\nu_{as}(\text{C-H}_{\text{Ben}})$                                                                                                                                              |
| 3087.76                           |      | 37                                 | $\nu(\text{C-H})$                                                                                                                                                                |
| 3087.71                           |      | 62                                 | $\nu(\text{C-H})$                                                                                                                                                                |
| 1695.27                           |      | 24                                 | $\nu(\text{C-N})+\rho(\text{C-H})+\rho(\text{N-H}_{\text{Pyr}})$                                                                                                                 |
| 1690.63                           |      | 788                                | $\nu(\text{C=C-C=C}_{\text{Ben}})+\rho+\delta(\text{C-H}_{\text{Ben}})+\nu(\text{C-N}_{\text{Pyr}})+\rho(\text{N-H}_{\text{Pyr}})+\nu(\text{C-N})$                               |
| 1678.44                           |      | 1221                               | $\nu(\text{C=C-C=C}_{\text{Ben}})+\rho+\delta(\text{C-H}_{\text{Ben}})+\nu(\text{C-N}_{\text{Pyr}})+\rho(\text{N-H}_{\text{Pyr}})+\rho(\text{C-H}_{\text{Pyr}})$                 |
| 1640.64                           |      | 28                                 | $\nu(\text{C=C-C=C}_{\text{Ben}})+\rho+\delta(\text{C-H}_{\text{Ben}})+\rho(\text{C-H}_{\text{Pyr}})+\rho(\text{N-H}_{\text{Pyr}})$                                              |
| 1636.90                           | 1604 | 49                                 | $\nu(\text{C=C-C=C}_{\text{Ben}})+\rho+\delta(\text{C-H}_{\text{Ben}})$                                                                                                          |
| 1596.39                           |      | 21                                 | $\nu(\text{C=C-C=C}_{\text{Ben}})+\rho+\delta(\text{C-H}_{\text{Ben}})+\nu(\text{C-N}_{\text{Pyr}})+\rho(\text{N-H}_{\text{Pyr}})+\rho(\text{C-H}_{\text{Pyr}})+\nu(\text{C-N})$ |
| 1595.36                           |      | 10                                 | $\nu(\text{C=C-C=C}_{\text{Ben}})+\rho+\delta(\text{C-H}_{\text{Ben}})+\nu(\text{C-N}_{\text{Pyr}})+\rho(\text{N-H}_{\text{Pyr}})+\rho(\text{C-H}_{\text{Pyr}})+\nu(\text{C-N})$ |
| 1554.82                           |      | 181                                | $\nu(\text{C=C-C=C}_{\text{Ben}})+\rho+\delta(\text{C-H}_{\text{Ben}})$                                                                                                          |
| 1492.39                           | 1493 | 15                                 | $\nu(\text{C=C-C=C}_{\text{Ben}})+\rho+\delta(\text{C-H}_{\text{Ben}})$                                                                                                          |
| 1489.33                           |      | 9                                  | $\nu(\text{C=C-C=C}_{\text{Ben}})+\rho(\text{C-H}_{\text{Ben}})$                                                                                                                 |
| 1471.30                           |      | 49                                 | $\nu(\text{C-N}_{\text{Pyr}})+\rho(\text{N-H}_{\text{Pyr}})+\rho(\text{C-H})+\rho(\text{C-H}_{\text{Ben}})$                                                                      |
| 1471.03                           |      | 183                                | $\nu(\text{C-N}_{\text{Pyr}})+\rho(\text{N-H}_{\text{Pyr}})+\rho(\text{C-H})+\rho(\text{C-H}_{\text{Ben}})$                                                                      |
| 1441.99                           | 1439 | 221                                | $\nu(\text{C=C-C=C}_{\text{Ben}})+\rho(\text{C-H}_{\text{Ben}})$                                                                                                                 |
| 1418.5                            | 1396 | 7                                  | $\nu(\text{C=C-C=C}_{\text{Ben}})+\rho+\delta(\text{C-H}_{\text{Ben}})+\nu(\text{C-N}_{\text{Pyr}})+\rho(\text{N-H}_{\text{Pyr}})+\rho(\text{C-H}_{\text{Pyr}})$                 |
| 1382.21                           |      | 266                                | $\nu(\text{C=C-C=C}_{\text{Ben}})+\rho(\text{C-H}_{\text{Ben}})+\nu(\text{C-N}_{\text{Pyr}})+\rho(\text{N-H}_{\text{Pyr}})+\rho(\text{C-H}_{\text{Pyr}})$                        |
| 1378.80                           |      | 52                                 | $\rho(\text{C-H})$                                                                                                                                                               |
| 1355.80                           |      | 81                                 | $\nu(\text{C=C-C=C}_{\text{Ben}})+\rho(\text{C-H}_{\text{Ben}})$                                                                                                                 |
| 1339.49                           |      | 37                                 | $\rho(\text{C-H})$                                                                                                                                                               |
| 1295.17                           |      | 68                                 | $\rho(\text{C-H})$                                                                                                                                                               |
| 1262.14                           |      | 8                                  | $\rho(\text{C-H}_{\text{Ben}})$                                                                                                                                                  |
| 1247.07                           | 1249 | 122                                | $\nu(\text{C=C-C=C}_{\text{Ben}})+\rho+\delta(\text{C-H}_{\text{Ben}})+\rho(\text{N-H}_{\text{Pyr}})$                                                                            |
| 1176.33                           |      | 16                                 | $\nu(\text{C=C-C=C}_{\text{Ben}})+\delta(\text{C-H}_{\text{Ben}})+\nu(\text{C-N}_{\text{Pyr}})+\rho(\text{C-H}_{\text{Pyr}})$                                                    |
| 1154.43                           |      | 373                                | $\nu(\text{C=C-C=C}_{\text{Ben}})+\delta(\text{C-H}_{\text{Ben}})+\nu(\text{C-N}_{\text{Pyr}})+\rho(\text{C-H}_{\text{Pyr}})$                                                    |

|         |      |     |                                                                                                                          |
|---------|------|-----|--------------------------------------------------------------------------------------------------------------------------|
| 1143.97 | 1104 | 23  | H <sub>Pyr</sub> )<br>ν(C=C-C=C <sub>Ben</sub> )+ρ+δ(C-H <sub>Ben</sub> )                                                |
| 1096.67 |      | 41  | ν(C=C-C=C <sub>Ben</sub> )+ρ+δ(C-H <sub>Ben</sub> )                                                                      |
| 1044.69 |      | 12  | ν(C=C-C=C <sub>Ben</sub> )+ρ+δ(C-H <sub>Ben</sub> )+ν(C-N <sub>Pyr</sub> )+ρ(N-H <sub>Pyr</sub> )+ρ(C-H <sub>Pyr</sub> ) |
| 1026.35 |      | 10  | ν(C=C-C=C <sub>Ben</sub> )+ρ+δ(C-H <sub>Ben</sub> )+ν(C-N <sub>Pyr</sub> )+ρ(N-H <sub>Pyr</sub> )+ρ(C-H <sub>Pyr</sub> ) |
| 996.58  |      | 11  | γ(C-H <sub>Ben</sub> )                                                                                                   |
| 962.29  | 971  | 153 | ν(C=C-C=C <sub>Ben</sub> )+ρ+γ(C-H <sub>Ben</sub> )                                                                      |
| 930.76  | 923  | 7   | τ(C-H <sub>Ben</sub> )                                                                                                   |
| 829.03  |      | 72  | w(C-H <sub>Ben</sub> )+γ(C-H <sub>Pyr</sub> )                                                                            |
| 828.42  | 821  | 60  | w+τ(C-H <sub>Ben</sub> )+γ(C-H <sub>Pyr</sub> )                                                                          |
| 811.08  | 803  | 143 | w(C-H <sub>Ben</sub> )                                                                                                   |
| 799.04  |      | 14  | w(C-H <sub>Ben</sub> )                                                                                                   |
| 797     |      | 35  | ν(C=C-C=C <sub>Ben</sub> )+τ(C-H <sub>Ben</sub> )                                                                        |
| 774.63  |      | 26  | w+τ(C-H <sub>Ben</sub> )                                                                                                 |
| 774.37  | 768  | 27  | w+τ(C-H <sub>Ben</sub> )                                                                                                 |
| 758.48  |      | 60  | w(C-H <sub>Ben</sub> )                                                                                                   |
| 758.42  |      | 50  | w(C-H <sub>Ben</sub> )                                                                                                   |
| 668.04  |      | 29  | γ(C-H <sub>Pyr</sub> )+γ(N-H <sub>Pyr</sub> )                                                                            |

Frequencies are given in cm<sup>-1</sup>, ν=stretching, β=in-plane bending, γ=out-plane bending, δ=scissoring, ρ=rocking, w=wagging, s=symmetric stretching, as=asymmetric stretching, τ=twisting, Pyr=Pyrole, Ben=benzene ring.

**Table S10:** Energies of frontier molecular orbitals and band gaps of entitled compounds.

| Compounds | $E_{\text{HOMO}}$ | $E_{\text{LUMO}}$ | $\Delta E$ | $E_{\text{opt}}$ | $\lambda_{\text{onset (nm)}}$ |
|-----------|-------------------|-------------------|------------|------------------|-------------------------------|
| ND1       | -6.070            | -2.232            | 3.838      | 3.850            | 322                           |
| ND2       | -6.042            | -2.175            | 3.867      | 3.916            | 317                           |
| ND3       | -6.060            | -2.208            | 3.852      | 4.065            | 305                           |
| ND4       | -5.994            | -2.094            | 3.900      | 3.936            | 315                           |
| ND5       | -6.071            | -2.267            | 3.804      | 3.850            | 322                           |
| ND6       | -5.783            | -2.003            | 3.780      | 3.647            | 340                           |
| ND7       | -5.811            | -1.830            | 3.981      | 3.875            | 320                           |
| ND8       | -5.904            | -1.970            | 3.934      | 3.815            | 325                           |
| ND9       | -5.836            | -2.133            | 3.703      | 3.792            | 327                           |

Band gap =  $E_{\text{LUMO}} - E_{\text{HOMO}}$ , units in eV;  $E_{\text{opt}}$  is the optical band gap calculated through onset wavelength of experimental UV-Vis spectrum

**Table S11:** Wave length, excitation energy and oscillator strength of investigated chromophores in acetonitrile phase

| Compounds | $\lambda$ (nm) | $E$ (eV) | $f_{\text{os}}$ | MO contributions                                                               |
|-----------|----------------|----------|-----------------|--------------------------------------------------------------------------------|
| ND1       | 399.112        | 3.107    | 0.686           | H→L (97%)                                                                      |
|           | 370.633        | 3.345    | 0.005           | H→L+1 (95%)                                                                    |
|           | 304.899        | 4.066    | 0.002           | H-4→L (11%), H-1→L (76%), H-7→L+1 (6%), H→L+1 (2%)                             |
|           | 298.218        | 4.158    | 0.000           | H-2→L (56%), H→L+5 (25%), H-7→L (2%), H-4→L+1 (3%), H-2→L+4 (2%), H-1→L+1 (8%) |
|           | 294.331        | 4.212    | 0.001           | H-4→L+1 (12%), H-3→L (11%), H-1→L+1 (36%), H→L+4                               |

|            |         |       |       |                                                                                                                           |
|------------|---------|-------|-------|---------------------------------------------------------------------------------------------------------------------------|
|            | 275.001 | 4.509 | 0.001 | (12%), H-7→L (8%), H-2→L (6%), H→L+5 (9%)<br>H→L+3 (88%), H-6→L (4%), H-5→L+1 (3%), H-1→L+2 (3%)                          |
| <b>ND2</b> | 396.052 | 3.131 | 0.690 | H→L (97%)                                                                                                                 |
|            | 367.274 | 3.376 | 0.006 | H→L+1 (95%)                                                                                                               |
|            | 304.047 | 4.078 | 0.003 | H-6→L (11%), H-1→L (74%), H-7→L+1 (6%), H-4→L (4%),<br>H→L+1 (2%)                                                         |
|            | 297.125 | 4.173 | 0.001 | H-2→L (55%), H→L+3 (28%), H-7→L (2%), H-6→L+1 (3%),<br>H-2→L+2 (2%), H-1→L+1 (6%)                                         |
|            | 293.447 | 4.225 | 0.001 | H-6→L+1 (12%), H-1→L+1 (32%), H→L+2 (13%), H-7→L (8%),<br>H-5→L (7%), H-4→L+1 (3%), H-3→L (5%), H-2→L (4%),<br>H→L+3 (9%) |
|            | 277.233 | 4.472 | 0.596 | H-3→L (21%), H-1→L+1 (29%), H→L+2 (41%), H-4→L+1 (3%)                                                                     |
| <b>ND3</b> | 398.253 | 3.113 | 0.711 | H→L (97%)                                                                                                                 |
|            | 369.429 | 3.356 | 0.004 | H→L+1 (95%)                                                                                                               |
|            | 304.869 | 4.067 | 0.002 | H-6→L (10%), H-1→L (71%), H-7→L+1 (6%), H-4→L (7%),<br>H→L+1 (2%)                                                         |
|            | 297.774 | 4.164 | 0.001 | H-3→L (29%), H-2→L (26%), H→L+5 (26%), H-7→L (2%),<br>H-6→L+1 (3%), H-1→L+1 (7%)                                          |
|            | 294.129 | 4.215 | 0.001 | H-6→L+1 (11%), H-1→L+1 (30%), H→L+2 (12%), H-7→L (8%),<br>H-5→L (9%), H-4→L+1 (6%), H-3→L (8%), H→L+5 (9%)                |
|            | 283.256 | 4.377 | 0.224 | H-4→L+1 (16%), H-3→L (23%), H-2→L (32%), H-1→L+1 (14%),<br>H-1→L+3 (2%), H→L+4 (6%)                                       |
| <b>ND4</b> | 392.367 | 3.160 | 0.799 | H→L (97%)                                                                                                                 |
|            | 361.639 | 3.428 | 0.006 | H→L+1 (94%)                                                                                                               |
|            | 304.248 | 4.075 | 0.002 | H-4→L (11%), H-1→L (73%), H-7→L+1 (5%), H-6→L (6%),<br>H→L+1 (2%)                                                         |
|            | 295.884 | 4.190 | 0.010 | H-3→L (40%), H-2→L (12%), H→L+3 (30%), H-7→L (3%),<br>H-6→L+1 (2%), H-4→L+1 (4%), H-3→L+2 (2%), H-1→L+1 (3%)              |
|            | 292.650 | 4.237 | 0.005 | H-4→L+1 (14%), H-3→L (12%), H-2→L (10%), H-1→L+1 (17%),<br>H→L+2 (14%), H→L+3 (12%), H-7→L (9%), H-6→L+1 (7%)             |
|            | 282.418 | 4.390 | 0.811 | H-2→L (35%), H-1→L+1 (50%), H-3→L (4%), H→L+2 (5%)                                                                        |
| <b>ND5</b> | 403.686 | 3.071 | 0.784 | H→L (97%)                                                                                                                 |
|            | 374.281 | 3.313 | 0.005 | H→L+1 (95%)                                                                                                               |
|            | 308.303 | 4.022 | 0.002 | H-4→L (16%), H-1→L (71%), H-7→L+1 (6%), H→L+1 (2%)                                                                        |
|            | 299.602 | 4.138 | 0.001 | H-2→L (46%), H-1→L+1 (11%), H→L+5 (18%), H-7→L (5%),<br>H-4→L+1 (8%), H-3→L (3%)                                          |
|            | 296.329 | 4.184 | 0.001 | H-4→L+1 (14%), H-3→L (21%), H-1→L+1 (22%), H→L+5 (15%),<br>H-7→L (8%), H-2→L (5%), H→L+2 (9%)                             |
|            | 283.250 | 4.377 | 1.061 | H-3→L (26%), H-1→L+1 (42%), H→L+2 (18%), H-2→L (8%)                                                                       |
| <b>ND6</b> | 405.320 | 3.059 | 0.949 | H→L (95%), H-1→L+1 (3%)                                                                                                   |
|            | 370.133 | 3.350 | 0.000 | H→L+1 (91%), H-1→L (4%)                                                                                                   |
|            | 345.830 | 3.585 | 0.016 | H-2→L+1 (10%), H-1→L (87%), H→L+1 (2%)                                                                                    |
|            | 334.665 | 3.705 | 0.181 | H-2→L (68%), H-1→L+1 (27%),                                                                                               |
|            | 315.126 | 3.934 | 0.099 | H-2→L (20%), H-1→L+1 (64%), H-7→L (2%), H-5→L+1 (5%),<br>H→L (4%), H→L+2 (2%)                                             |

|            |         |       |       |                                                                                                                       |
|------------|---------|-------|-------|-----------------------------------------------------------------------------------------------------------------------|
|            | 309.788 | 4.002 | 0.039 | H-5→L (19%), H-3→L (14%), H-2→L+1 (51%), H-7→L+1 (3%), H-1→L (4%), H→L+1 (4%)                                         |
| <b>ND7</b> | 383.138 | 3.236 | 1.005 | H→L (96%)                                                                                                             |
|            | 347.360 | 3.569 | 0.018 | H→L+1 (93%)                                                                                                           |
|            | 327.496 | 3.786 | 0.018 | H-1→L (74%), H-1→L+1 (12%), H-2→L (6%), H-2→L+1 (3%)                                                                  |
|            | 319.429 | 3.881 | 0.016 | H-2→L (65%), H-2→L+1 (18%), H-1→L (6%), H-1→L+1 (4%)                                                                  |
|            | 307.598 | 4.031 | 0.002 | H-3→L (79%), H-6→L (7%), H-2→L+1 (3%), H-1→L (3%)                                                                     |
|            | 293.883 | 4.219 | 0.084 | H-5→L (34%), H-4→L (10%), H→L+4 (47%)                                                                                 |
| <b>ND8</b> | 388.054 | 3.195 | 0.866 | H→L (96%)                                                                                                             |
|            | 355.620 | 3.486 | 0.043 | H→L+1 (93%)                                                                                                           |
|            | 311.359 | 3.982 | 0.042 | H-1→L (87%), H-6→L (2%), H-2→L+1 (2%)                                                                                 |
|            | 300.413 | 4.127 | 0.154 | H-2→L (49%), H→L+2 (14%), H-6→L (4%), H-3→L (8%), H-3→L+1 (5%), H-1→L+1 (7%)                                          |
|            | 294.204 | 4.214 | 0.003 | H-4→L (40%), H→L+4 (39%), H-5→L (3%), H→L+2 (6%), H→L+5 (3%)                                                          |
|            | 292.634 | 4.237 | 0.009 | H-3→L (26%), H-2→L+1 (11%), H→L+2 (31%), H-7→L+1 (3%), H-6→L (8%), H-4→L (3%), H-3→L+1 (3%), H-1→L+1 (2%), H→L+4 (3%) |
| <b>ND9</b> | 411.113 | 3.016 | 1.350 | H→L (96%)                                                                                                             |
|            | 369.449 | 3.356 | 0.004 | H→L+1 (93%), H-2→L+1 (2%)                                                                                             |
|            | 341.938 | 3.626 | 0.015 | H-1→L (94%), H-2→L+1 (4%)                                                                                             |
|            | 332.904 | 3.724 | 0.089 | H-2→L (79%), H-1→L+1 (10%), H-3→L+1 (8%)                                                                              |
|            | 323.556 | 3.832 | 0.013 | H-3→L (71%), H-2→L+1 (19%), H-4→L+1 (3%)                                                                              |
|            | 314.543 | 3.942 | 0.571 | H-1→L+1 (82%), H-6→L+1 (3%), H-3→L+1 (4%), H-2→L (6%), H→L (3%)                                                       |

MO=molecular orbital, H=HOMO, L=LUMO,  $f_{os}$  = oscillator strength, wavelength= $\lambda$  (nm)

**Table S112:** Hole-electron analysis indices for  $S_0 \rightarrow S_1$  excitation (with highest  $f_{osc}$ ) of compounds **ND1** to **ND9**.

| Compound   | Excitation            | E (eV) | D (Å) | $E_{Coul}$ (eV) | $S_r$  | H (Å) | t (Å)  | HDI  | EDI  |
|------------|-----------------------|--------|-------|-----------------|--------|-------|--------|------|------|
| <b>ND1</b> | $S_0 \rightarrow S_1$ | 3.107  | 0.328 | 3.8702          | 0.6931 | 4.027 | -0.511 | 6.15 | 5.17 |
| <b>ND2</b> | $S_0 \rightarrow S_1$ | 3.131  | 0.301 | 3.9519          | 0.7010 | 3.999 | -0.539 | 6.12 | 5.18 |
| <b>ND3</b> | $S_0 \rightarrow S_1$ | 3.113  | 0.311 | 3.8703          | 0.6960 | 4.016 | -0.528 | 6.13 | 5.17 |
| <b>ND4</b> | $S_0 \rightarrow S_1$ | 3.160  | 0.296 | 3.9206          | 0.7213 | 4.068 | -0.543 | 5.95 | 5.19 |
| <b>ND5</b> | $S_0 \rightarrow S_1$ | 3.071  | 0.323 | 3.8697          | 0.6951 | 4.152 | -0.513 | 6.06 | 5.18 |
| <b>ND6</b> | $S_0 \rightarrow S_1$ | 3.059  | 0.314 | 3.5747          | 0.7439 | 4.756 | -0.691 | 4.91 | 4.98 |
| <b>ND7</b> | $S_0 \rightarrow S_1$ | 3.236  | 0.564 | 3.7819          | 0.7474 | 4.234 | -3.297 | 5.46 | 5.20 |
| <b>ND8</b> | $S_0 \rightarrow S_1$ | 3.195  | 1.296 | 3.7668          | 0.7226 | 4.169 | -2.486 | 5.68 | 5.32 |
| <b>ND9</b> | $S_0 \rightarrow S_1$ | 3.016  | 0.148 | 3.4318          | 0.7504 | 4.926 | -0.725 | 4.91 | 5.03 |

**Table S13.** AIM properties of the main intra- and intermolecular interactions for **MK19**. Electronic density ( $\rho$ ), Laplacian of density ( $\nabla^2\rho$ ), ellipticity ( $\epsilon$ ) and density of potential energy ( $V$ ).

| Bond | $\rho$ (e/a <sup>3</sup> ) | $\nabla^2\rho$ (e/a <sup>5</sup> ) | $\epsilon$ | V (hartree.e/a <sup>3</sup> ) |
|------|----------------------------|------------------------------------|------------|-------------------------------|
|------|----------------------------|------------------------------------|------------|-------------------------------|



---

|           |           |           |           |           |
|-----------|-----------|-----------|-----------|-----------|
| C1 - C2   | +0.320434 | -0.923135 | +0.238782 | -0.455390 |
| C3 - C4   | +0.293330 | -0.787165 | +0.172781 | -0.374279 |
| C2 - C3   | +0.297389 | -0.813355 | +0.165985 | -0.385532 |
| C2 - H8   | +0.284081 | -0.990531 | +0.019517 | -0.322614 |
| C1 - C6   | +0.301014 | -0.832658 | +0.173419 | -0.396535 |
| C4 - C5   | +0.291219 | -0.784410 | +0.180977 | -0.364023 |
| C5 - N17  | +0.302935 | -0.904809 | +0.034566 | -0.546007 |
| C5 - C6   | +0.315301 | -0.889524 | +0.259981 | -0.441548 |
| C1 - H7   | +0.282583 | -0.982260 | +0.016081 | -0.320960 |
| C3 - C9   | +0.291219 | -0.784411 | +0.180977 | -0.364024 |
| C9 - N18  | +0.302935 | -0.904809 | +0.034566 | -0.546008 |
| C4 - C10  | +0.297389 | -0.813356 | +0.165985 | -0.385533 |
| C10 - H14 | +0.284081 | -0.990526 | +0.019517 | -0.322612 |
| C6 - H11  | +0.281659 | -0.972441 | +0.022137 | -0.320350 |
| C10 - C12 | +0.320434 | -0.923137 | +0.238782 | -0.455391 |
| C12 - C13 | +0.301014 | -0.832662 | +0.173419 | -0.396537 |
| C9 - C13  | +0.315301 | -0.889524 | +0.259981 | -0.441548 |
| C12 - H15 | +0.282583 | -0.982256 | +0.016081 | -0.320959 |
| C13 - H16 | +0.281659 | -0.972440 | +0.022137 | -0.320350 |
| N17 - C19 | +0.373373 | -0.796462 | +0.169141 | -0.981490 |
| C19 - C26 | +0.281325 | -0.753120 | +0.125008 | -0.333399 |
| N18 - C20 | +0.373374 | -0.796462 | +0.169141 | -0.981492 |
| C20 - C21 | +0.281324 | -0.753116 | +0.125007 | -0.333397 |
| C21 - C23 | +0.308027 | -0.856032 | +0.223573 | -0.417950 |
| C21 - C22 | +0.294638 | -0.798093 | +0.172685 | -0.378432 |
| C23 - C31 | +0.304898 | -0.846671 | +0.196201 | -0.408554 |
| C24 - C31 | +0.311361 | -0.874882 | +0.229401 | -0.430572 |
| C24 - H25 | +0.282084 | -0.980441 | +0.016791 | -0.319340 |
| C24 - C46 | +0.307550 | -0.865705 | +0.207443 | -0.417211 |
| C26 - C28 | +0.308026 | -0.856031 | +0.223573 | -0.417950 |
| C26 - C27 | +0.294638 | -0.798091 | +0.172685 | -0.378431 |
| C28 - C32 | +0.304898 | -0.846671 | +0.196201 | -0.408554 |
| C29 - C32 | +0.311361 | -0.874885 | +0.229401 | -0.430573 |
| C29 - H30 | +0.282084 | -0.980441 | +0.016791 | -0.319340 |
| C29 - C39 | +0.307550 | -0.865704 | +0.207442 | -0.417211 |
| C19 - H33 | +0.279097 | -0.956747 | +0.016614 | -0.308087 |
| C28 - H37 | +0.281735 | -0.973412 | +0.018740 | -0.320422 |
| C20 - H34 | +0.279098 | -0.956749 | +0.016614 | -0.308087 |
| C23 - H36 | +0.281735 | -0.973410 | +0.018740 | -0.320421 |
| C31 - H35 | +0.282636 | -0.980718 | +0.021518 | -0.321763 |
| C32 - H38 | +0.282636 | -0.980717 | +0.021518 | -0.321763 |
| C27 - C39 | +0.300342 | -0.821067 | +0.202866 | -0.394350 |
| C27 - C41 | +0.286848 | -0.738680 | +0.183276 | -0.368142 |
| C39 - N40 | +0.306073 | -0.707242 | +0.115480 | -0.694032 |
| N17 - H44 | +0.010474 | +0.035922 | +0.358304 | -0.006093 |
| N40 - H43 | +0.342367 | -1.794849 | +0.043663 | -0.544339 |

|           |           |           |           |           |
|-----------|-----------|-----------|-----------|-----------|
| N40 - C42 | +0.305584 | -0.647432 | +0.116594 | -0.717106 |
| C41 - C42 | +0.320927 | -0.907585 | +0.315610 | -0.470805 |
| C41 - H44 | +0.284716 | -0.997836 | +0.031549 | -0.324100 |
| C42 - H45 | +0.286970 | -1.020784 | +0.033503 | -0.322896 |
| C22 - C46 | +0.300342 | -0.821067 | +0.202865 | -0.394350 |
| C22 - C48 | +0.286847 | -0.738677 | +0.183276 | -0.368141 |
| C46 - N47 | +0.306073 | -0.707244 | +0.115480 | -0.694028 |
| N18 - H51 | +0.010474 | +0.035921 | +0.358313 | -0.006093 |
| N47 - H50 | +0.342367 | -1.794845 | +0.043664 | -0.544338 |
| N47 - C49 | +0.305584 | -0.647431 | +0.116594 | -0.717109 |
| C48 - C49 | +0.320927 | -0.907585 | +0.315610 | -0.470805 |
| C48 - H51 | +0.284716 | -0.997839 | +0.031549 | -0.324101 |
| C49 - H52 | +0.286970 | -1.020785 | +0.033503 | -0.322896 |

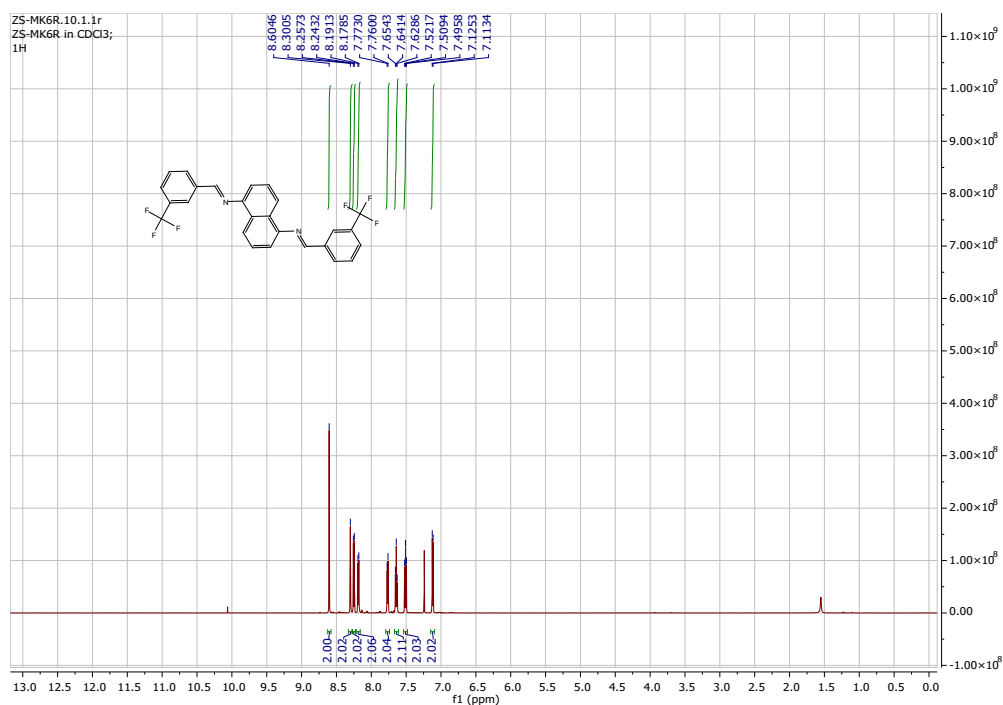

Figure S1: <sup>1</sup>H NMR of ND1

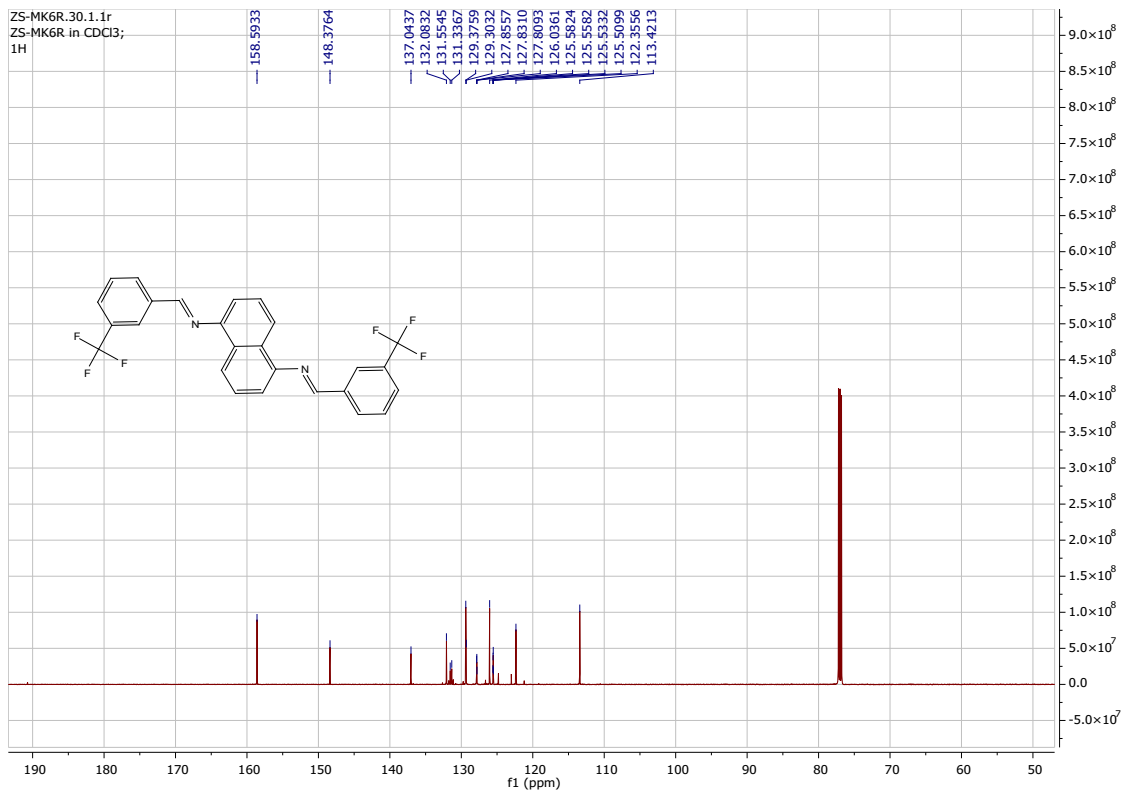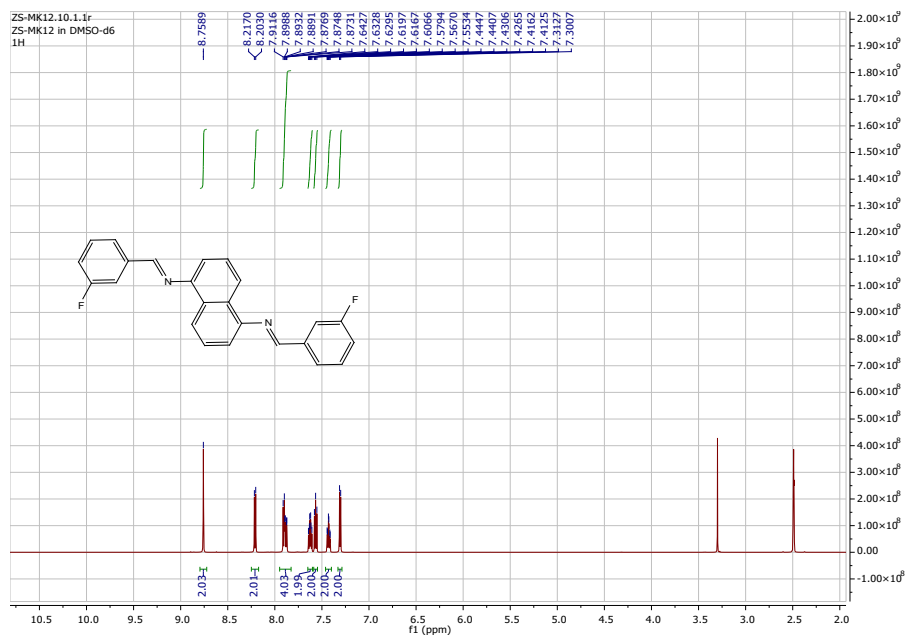

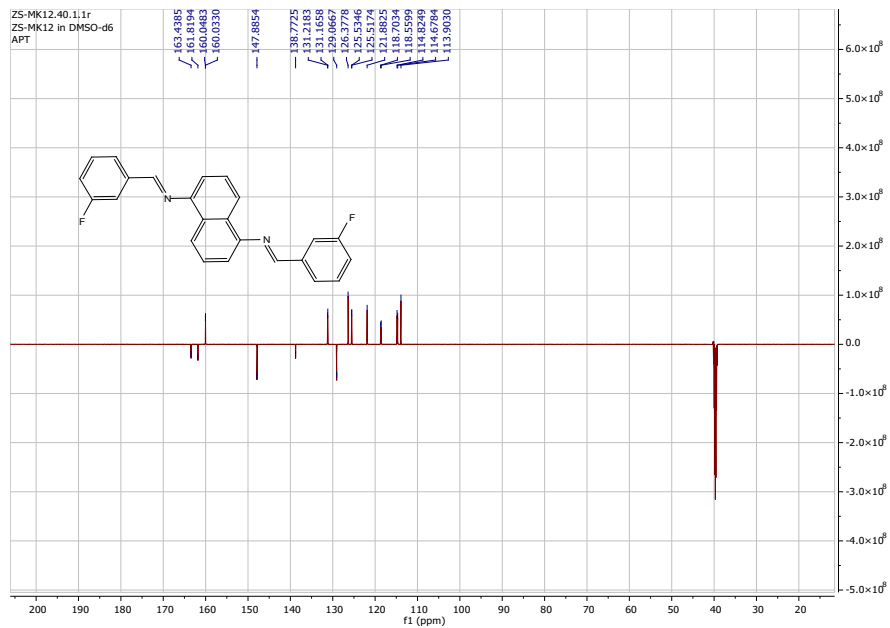

Figure S4:  $^{13}\text{C}$ NMR of ND2

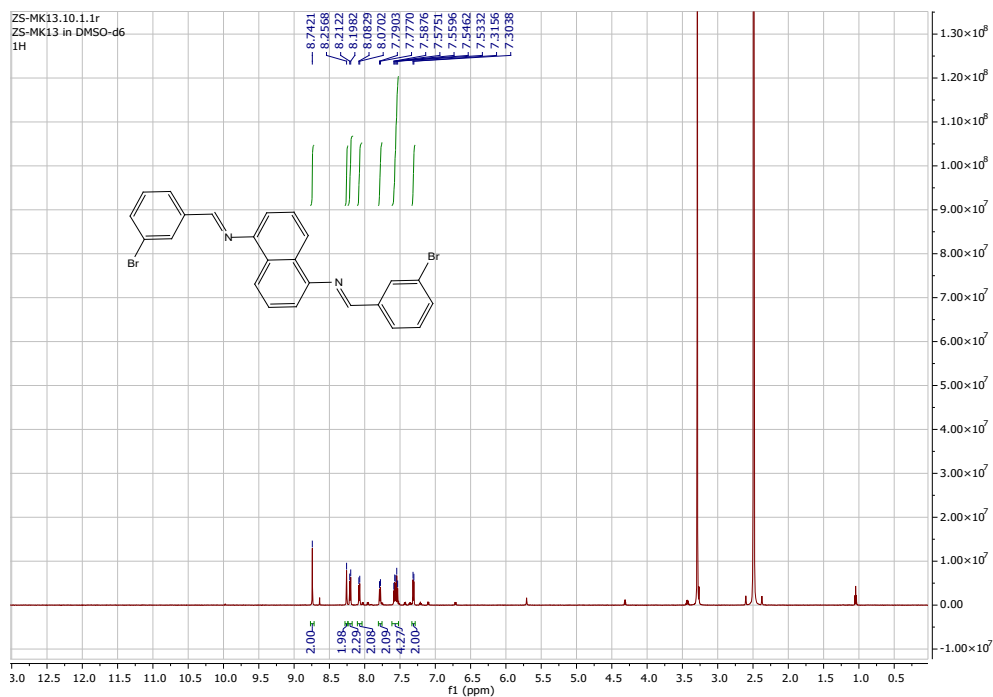

Figure S5:  $^1\text{H}$ NMR of ND3

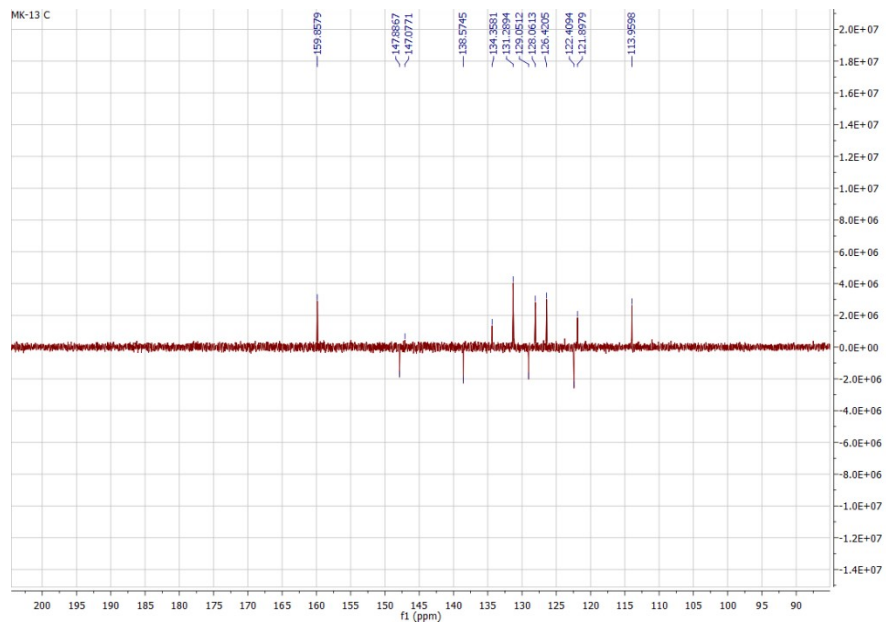

Figure S6:  $^{13}\text{C}$ NMR of ND3

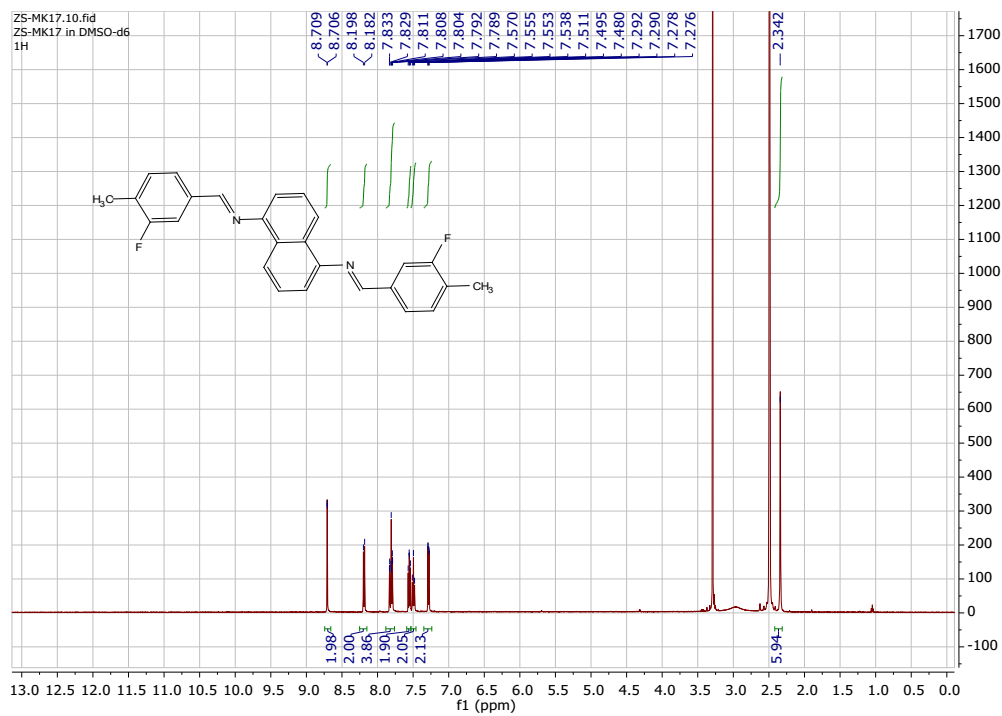

Figure S7:  $^1\text{H}$ NMR of ND4

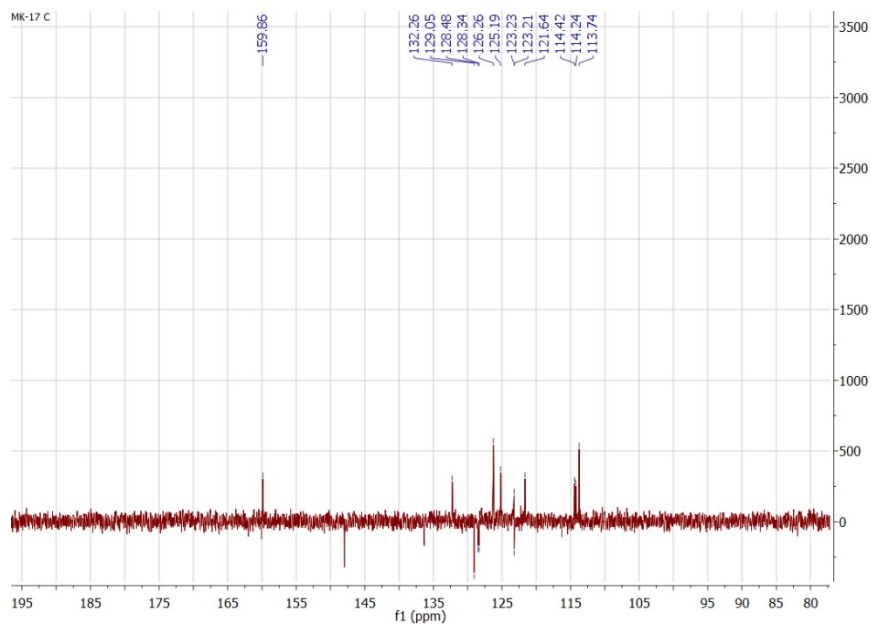

Figure S8:  $^{13}\text{C}$ NMR of ND4

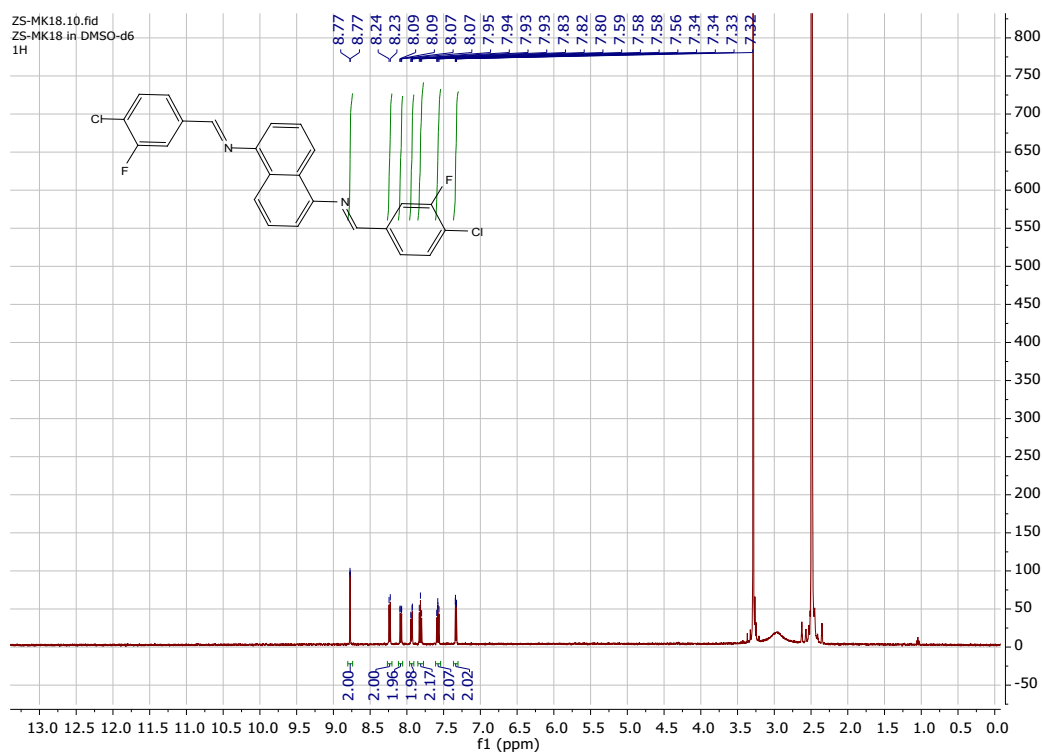

Figure S9:  $^1\text{H}$ NMR of ND5

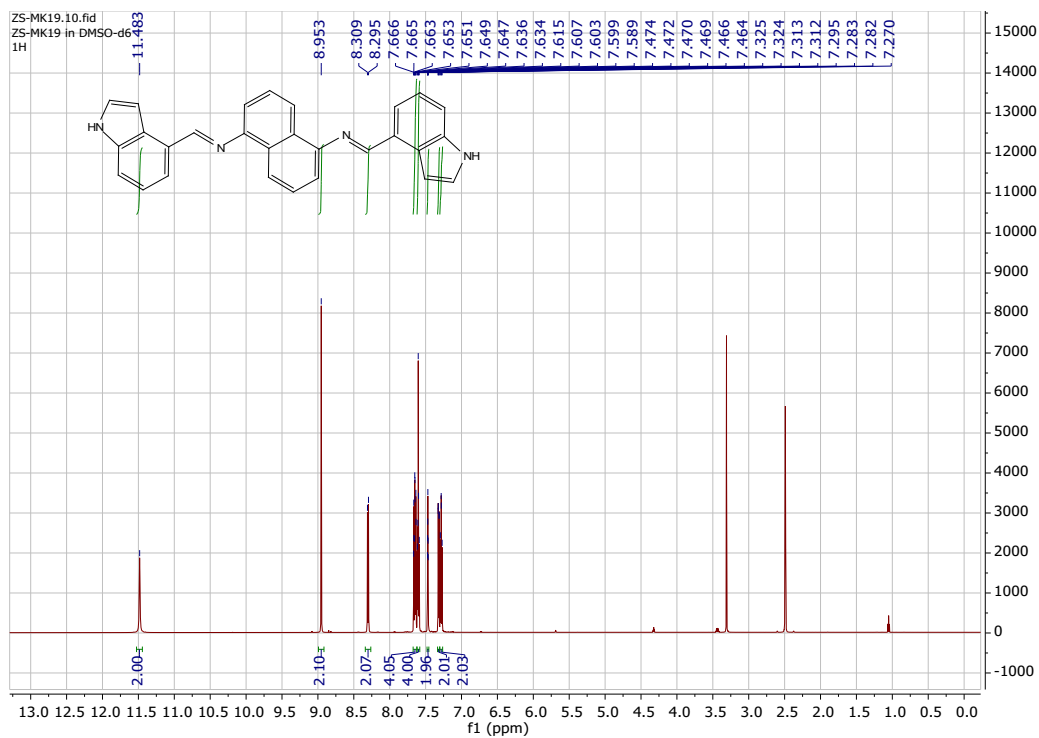

Figure S10: <sup>1</sup>H NMR of ND6

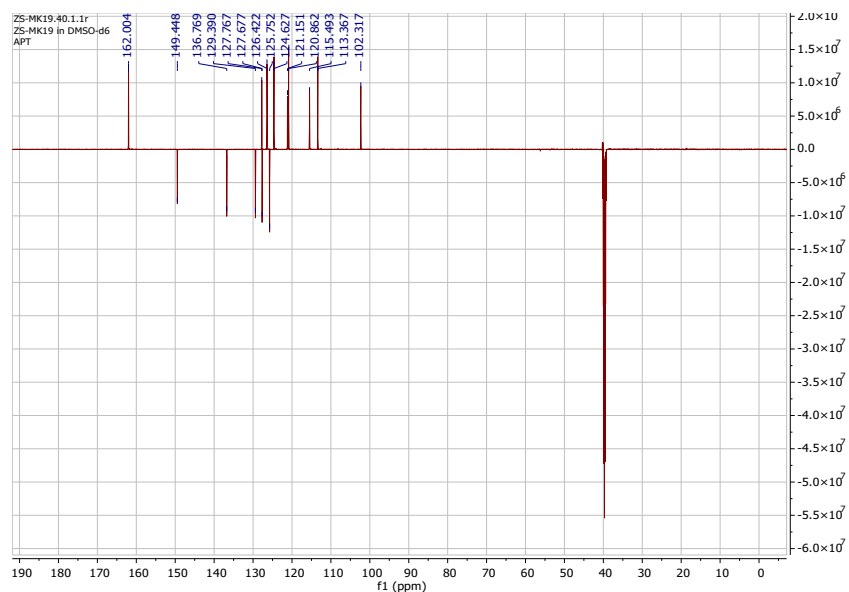

Figure S11: <sup>13</sup>C NMR of ND6

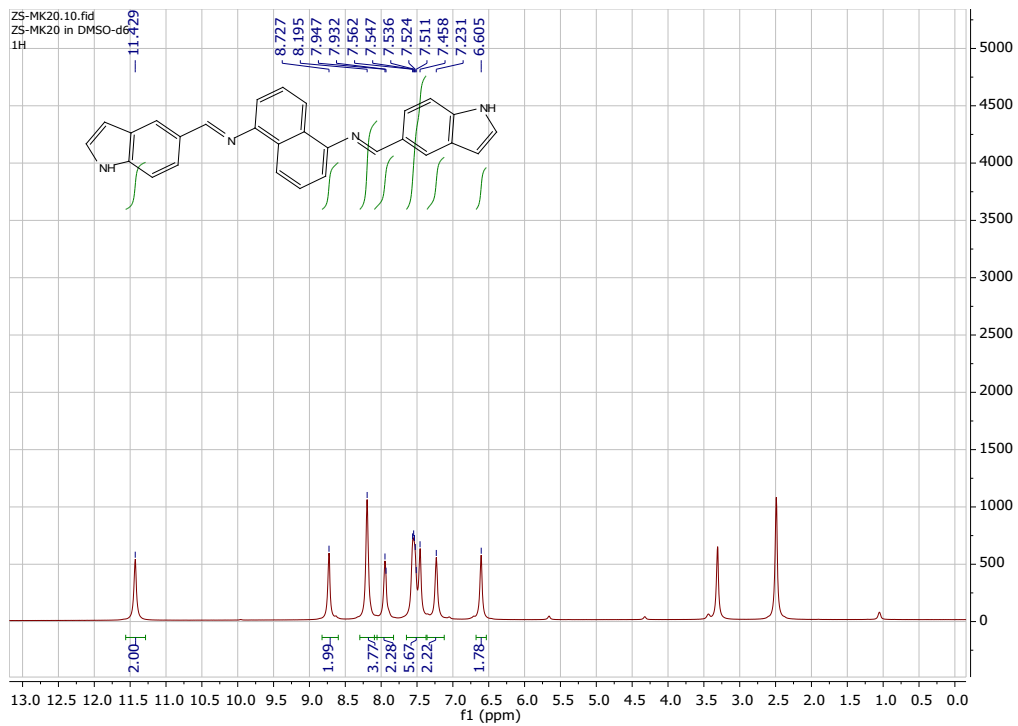

Figure S12: <sup>1</sup>H NMR of ND7

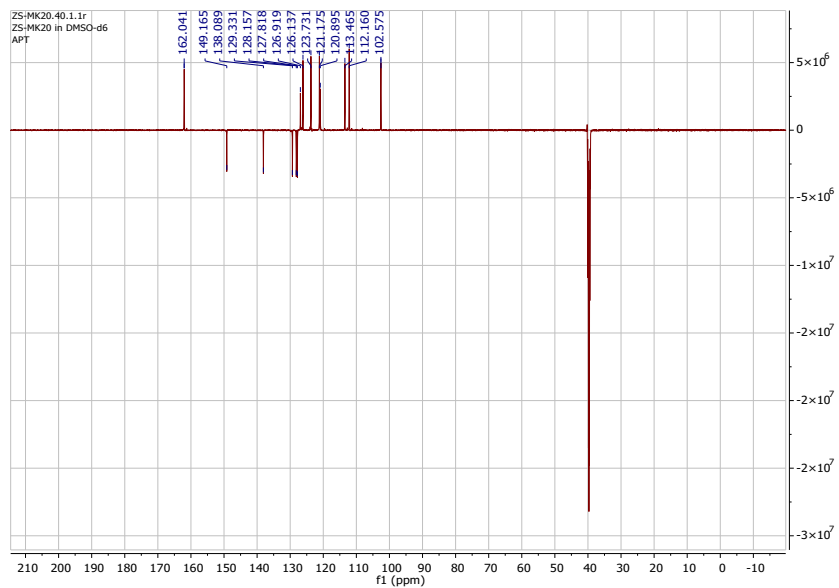

Figure S13: <sup>13</sup>C NMR of ND7



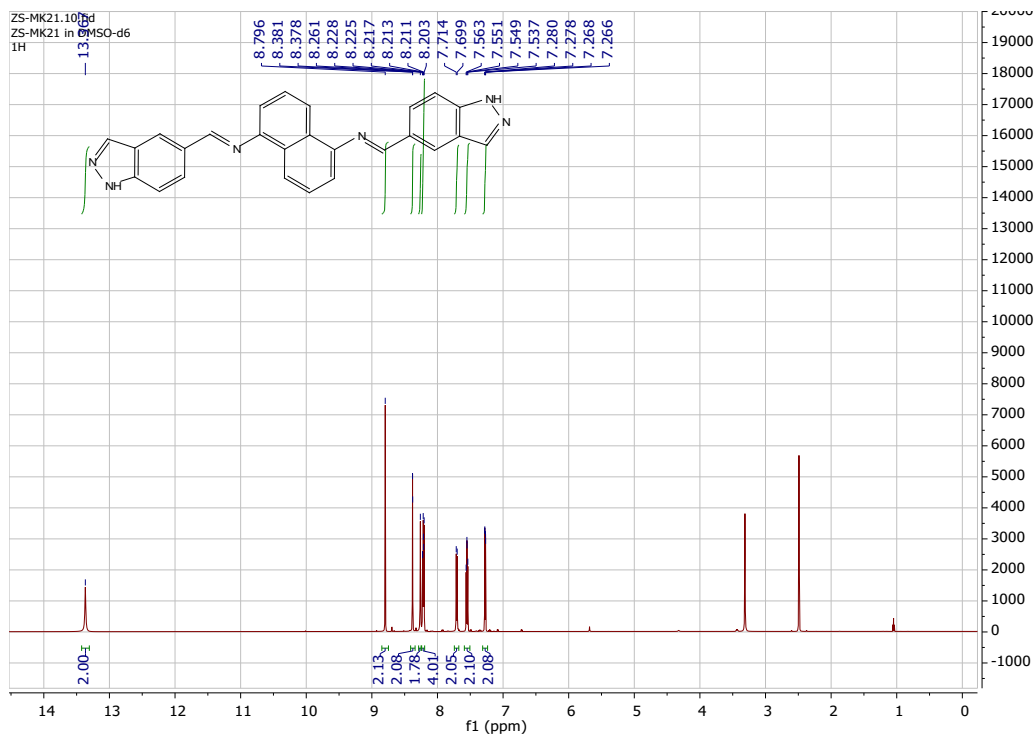

Figure S14: <sup>1</sup>H NMR of ND8

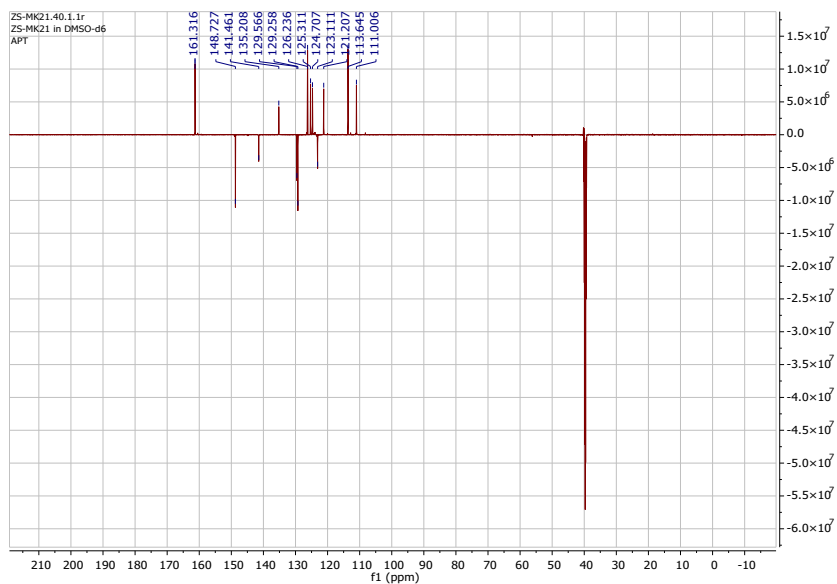

Figure S15: <sup>13</sup>C NMR of ND8

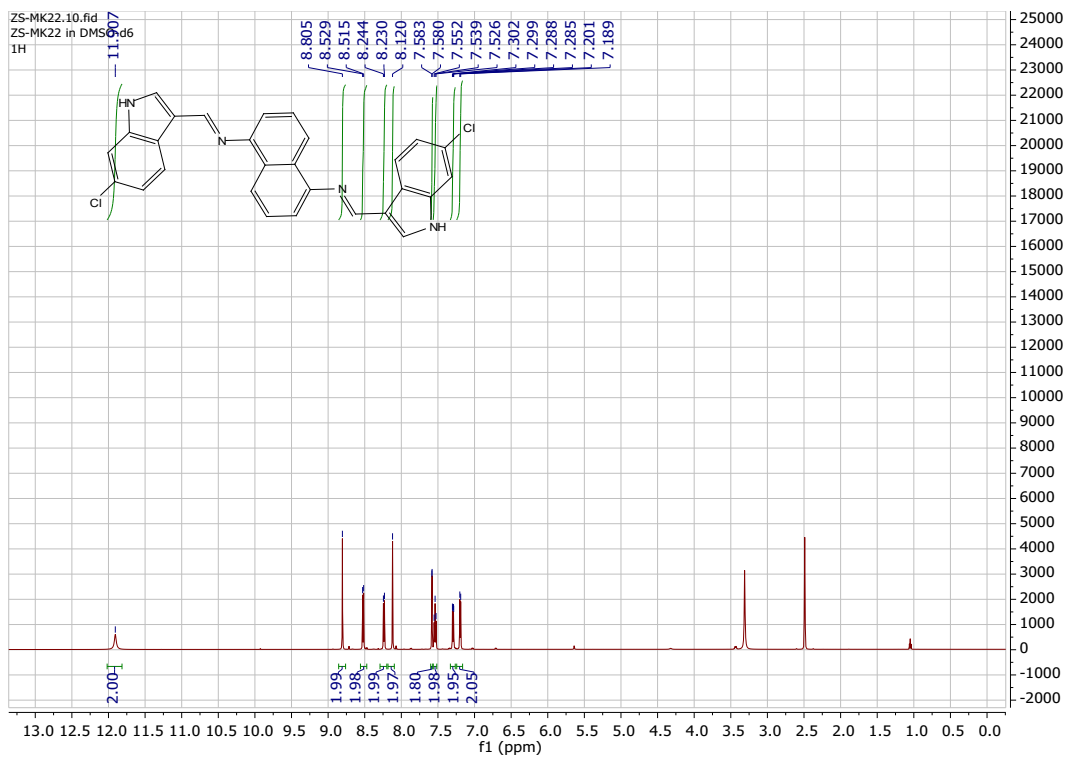

Figure S16: <sup>1</sup>H NMR of ND9

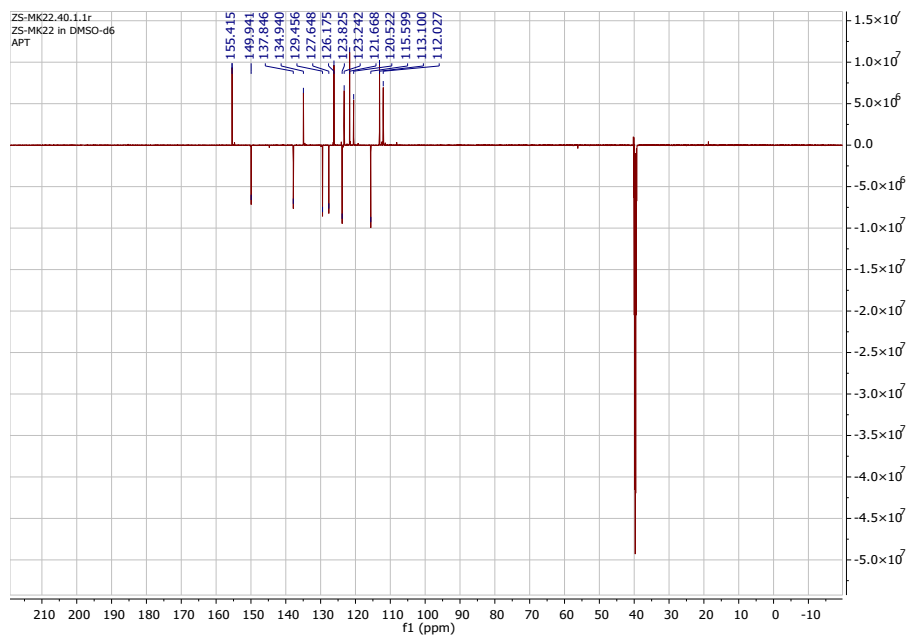

Figure S17: <sup>13</sup>C NMR of ND9

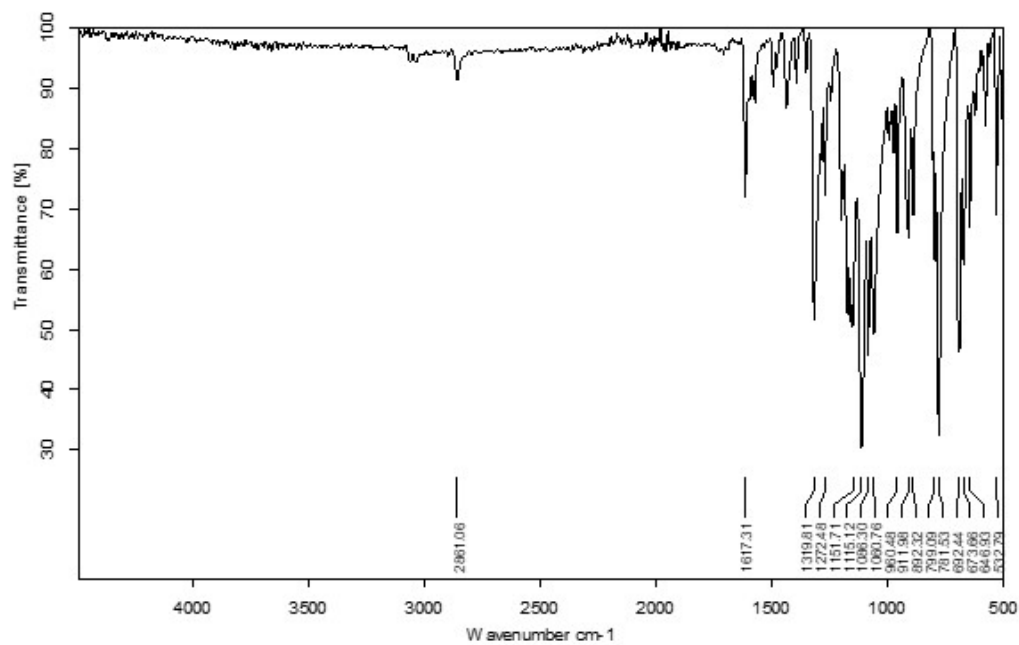

Figure S18: IR Spectrum of ND1

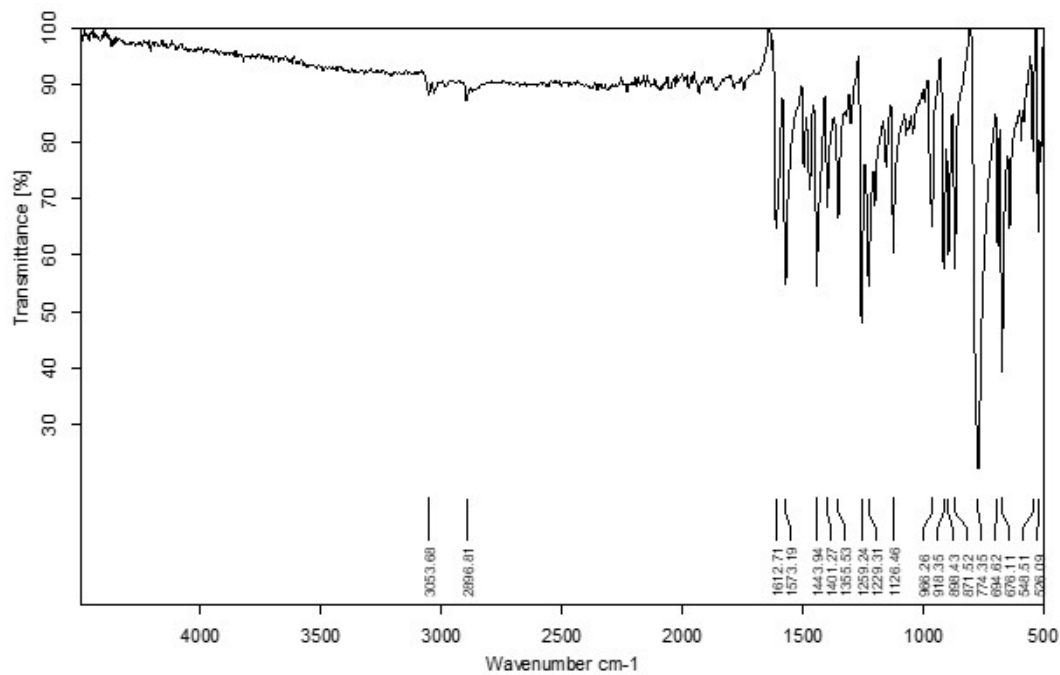

Figure S19: IR Spectrum of ND2

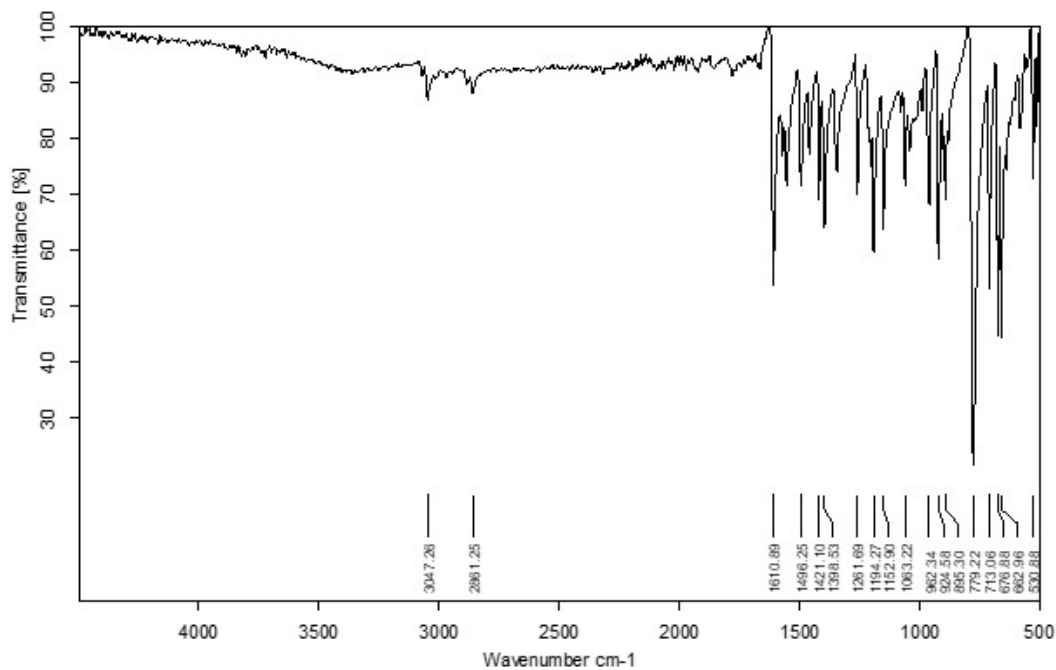

**Figure S20: IR Spectrum of ND3**

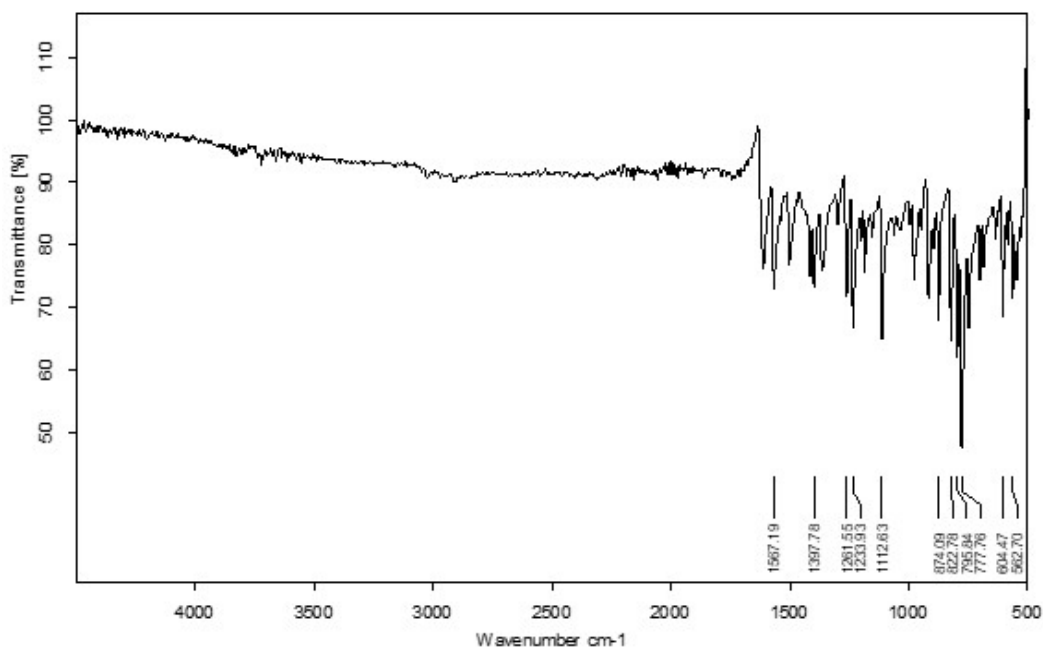

**Figure S21: IR Spectrum of ND4**

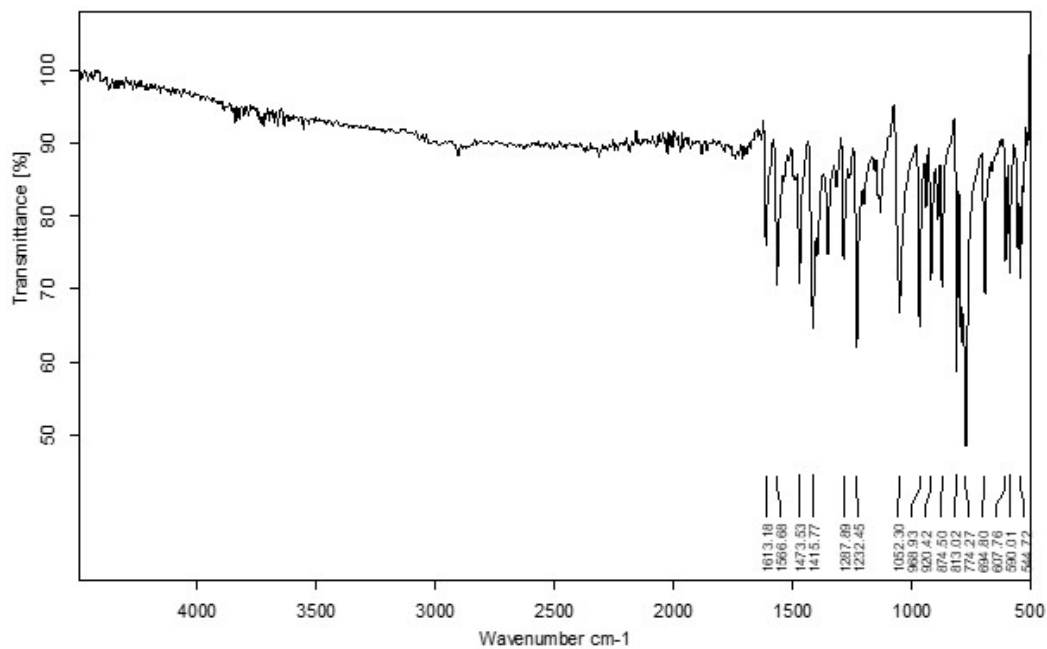

**Figure S22: IR Spectrum of ND5**

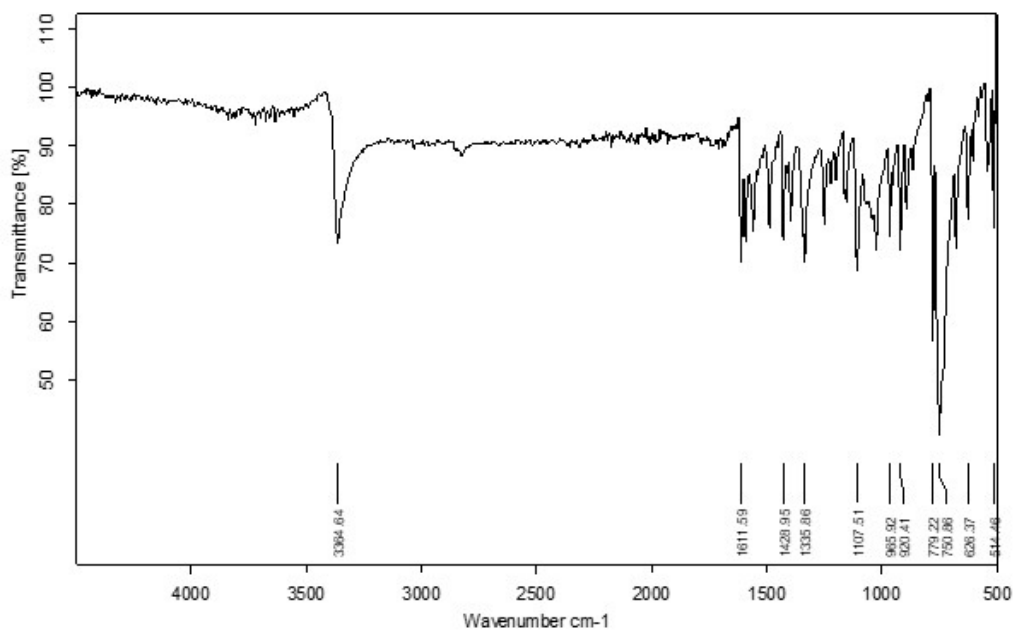

**Figure S23: IR Spectrum of ND6**

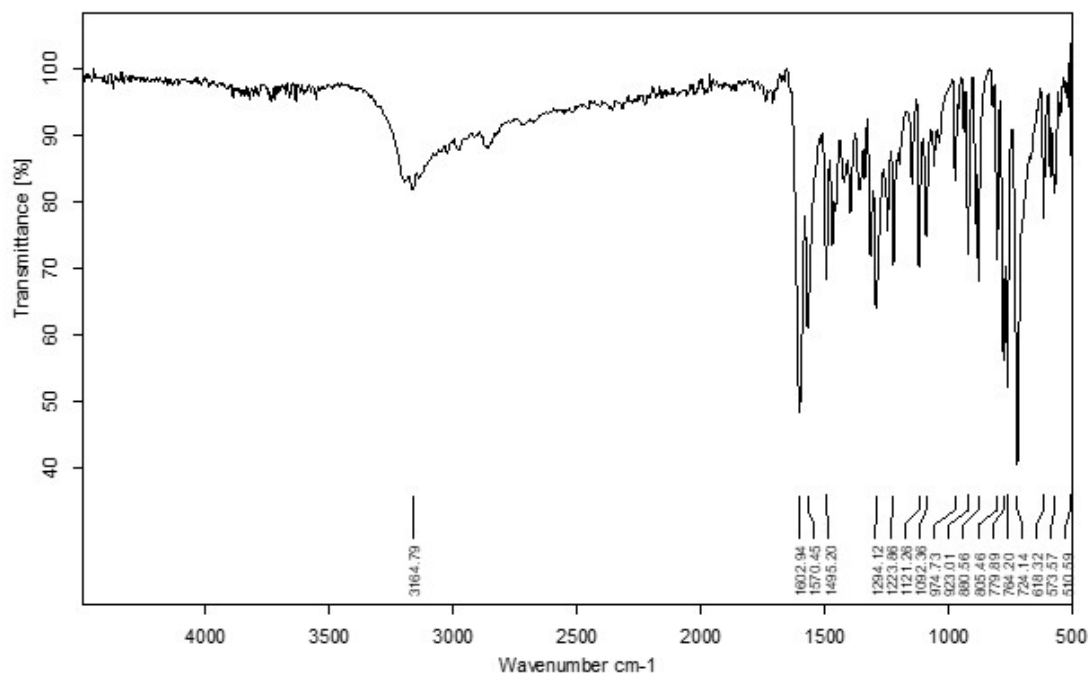

**Figure S24: IR Spectrum of ND7**

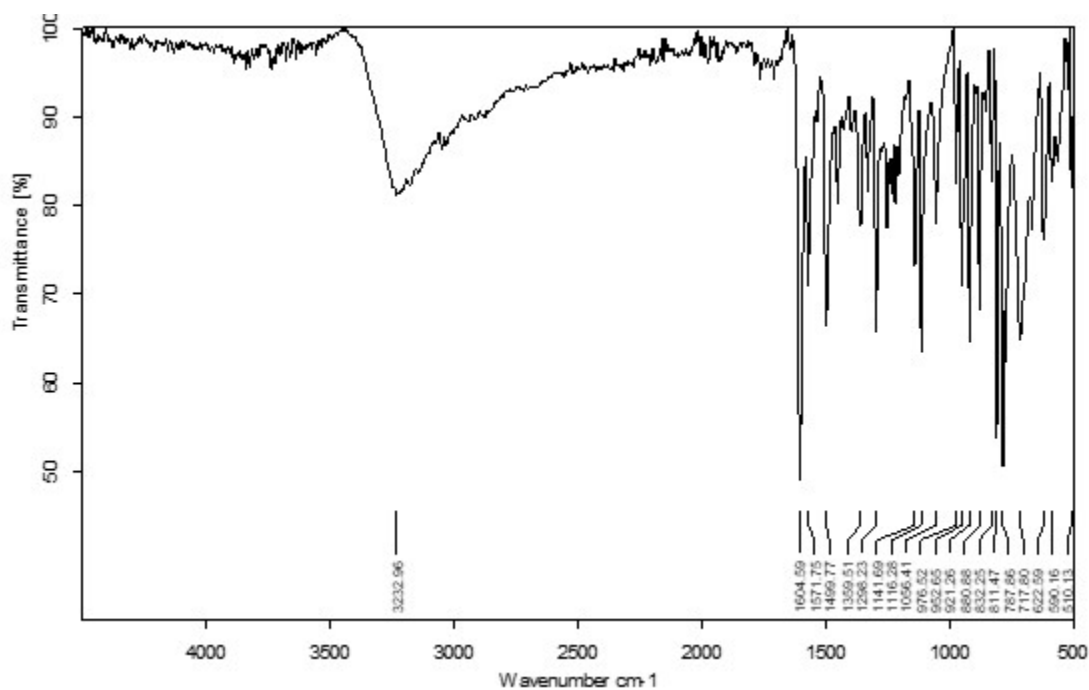

**Figure S25: IR Spectrum of ND8**

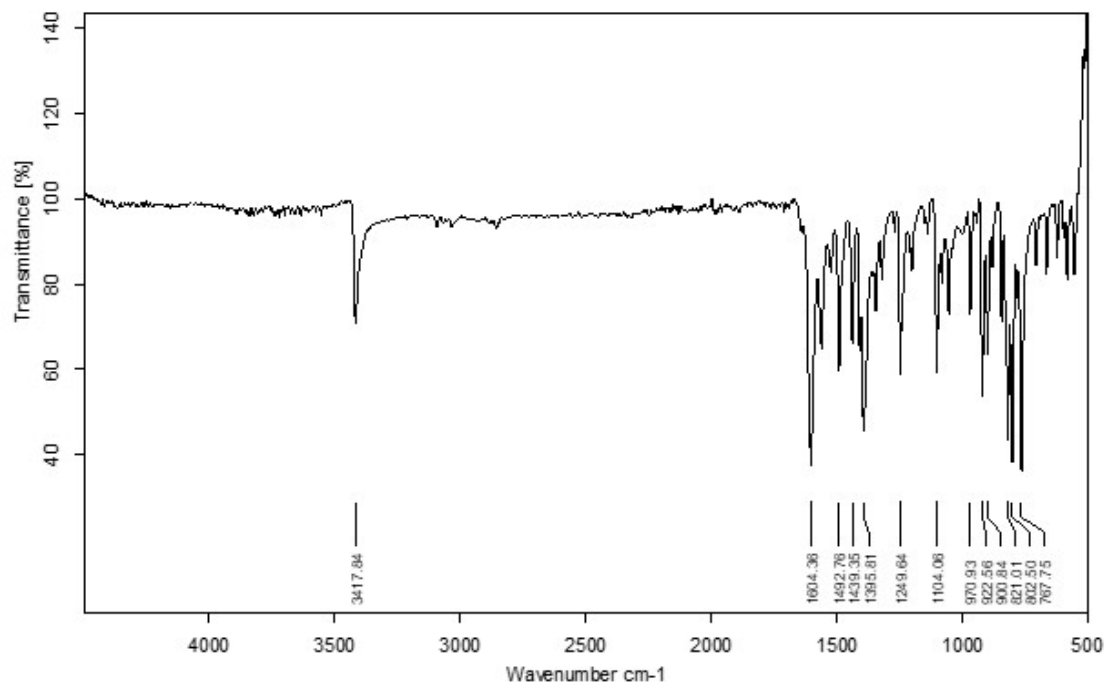

**Figure S26: IR Spectrum of ND9**

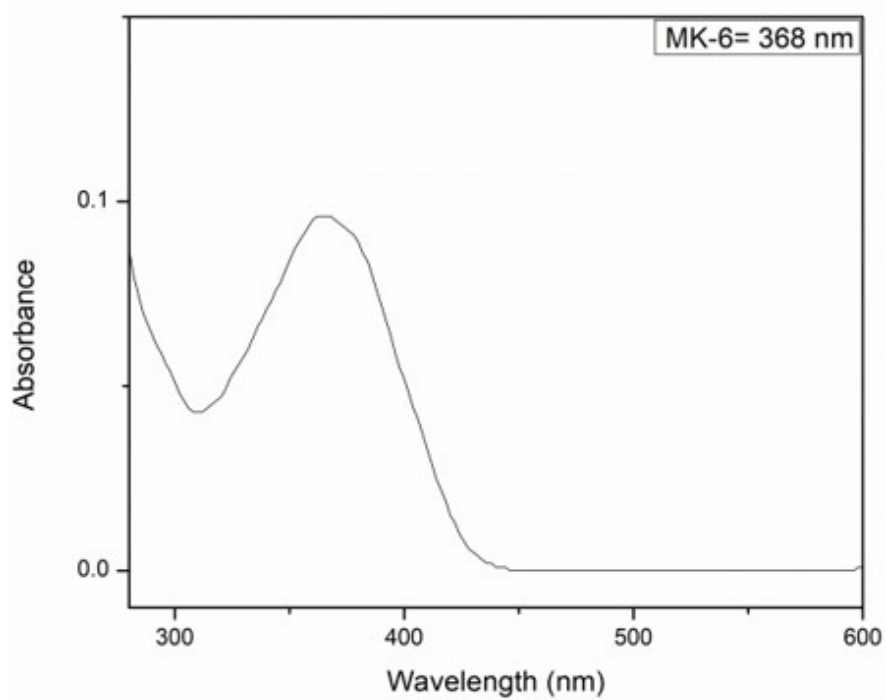

**Figure S27: UV-Visible Spectra of ND1**

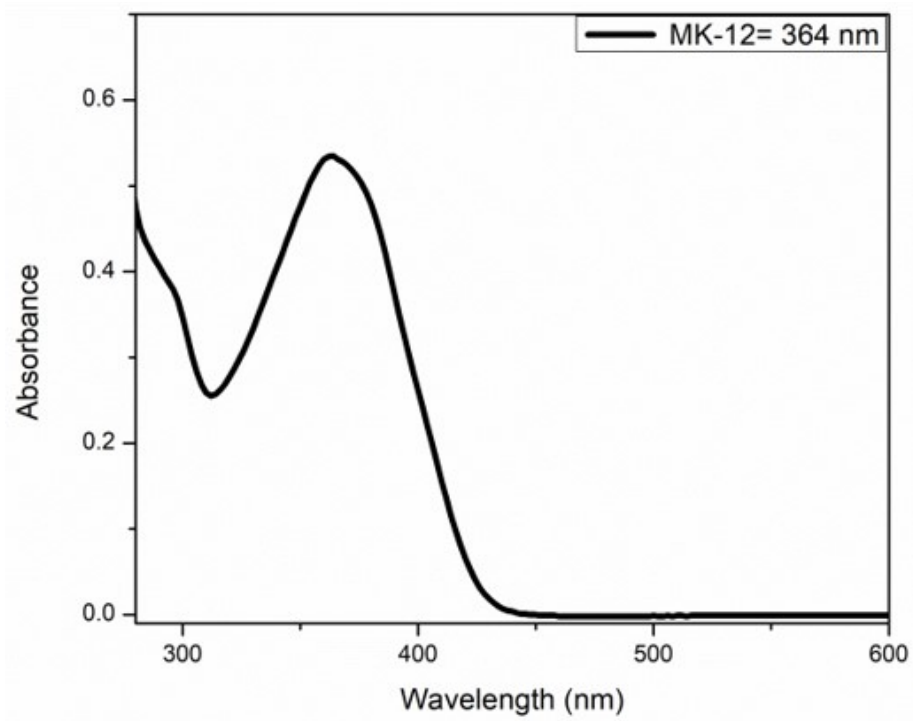

**Figure S28: UV-Visible Spectra of ND2**

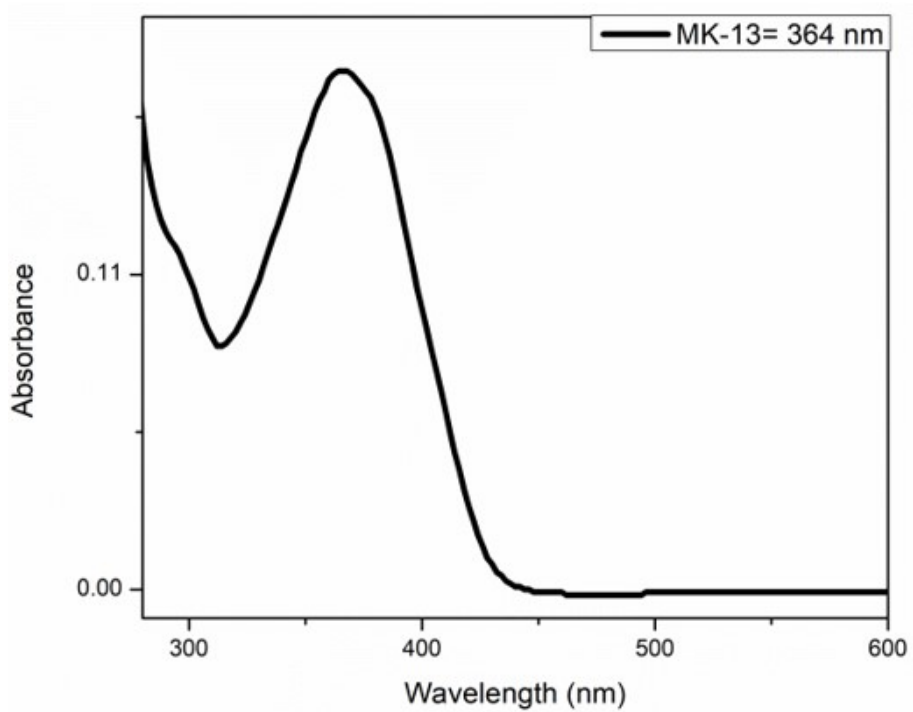

**Figure S29: UV-Visible Spectra of ND3**



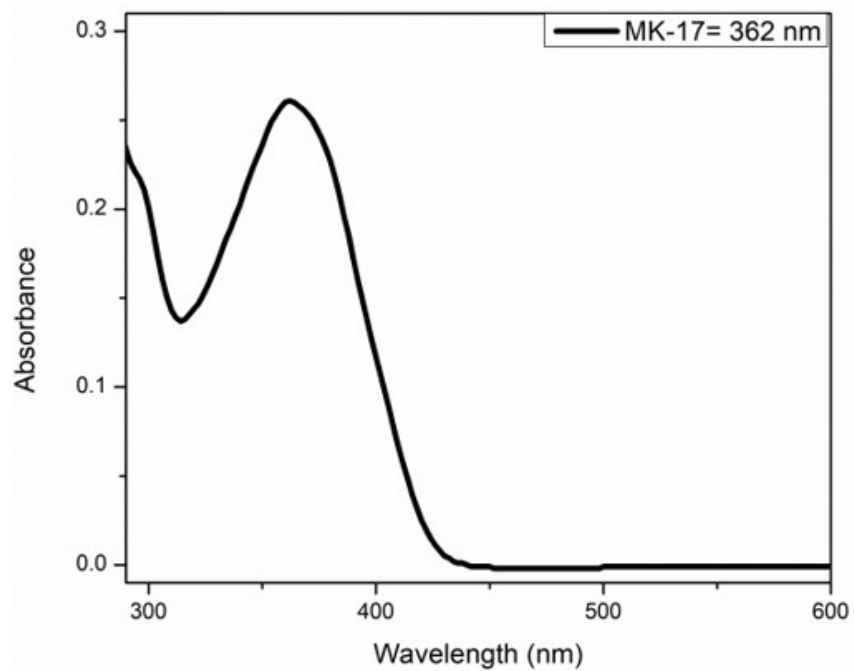

**Figure S30: UV-Visible Spectra of ND4**

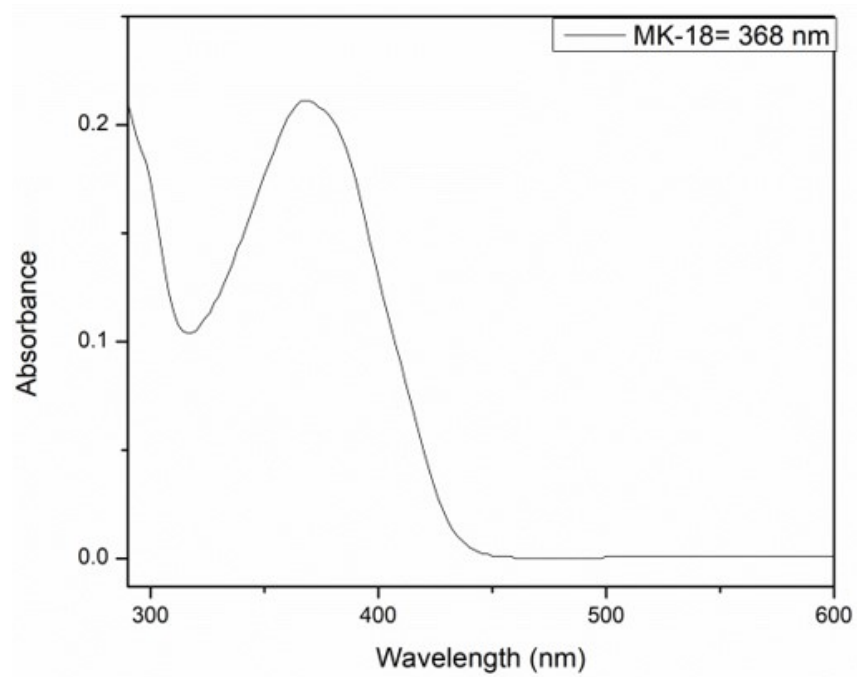

**Figure S31: UV-Visible Spectra of ND5**

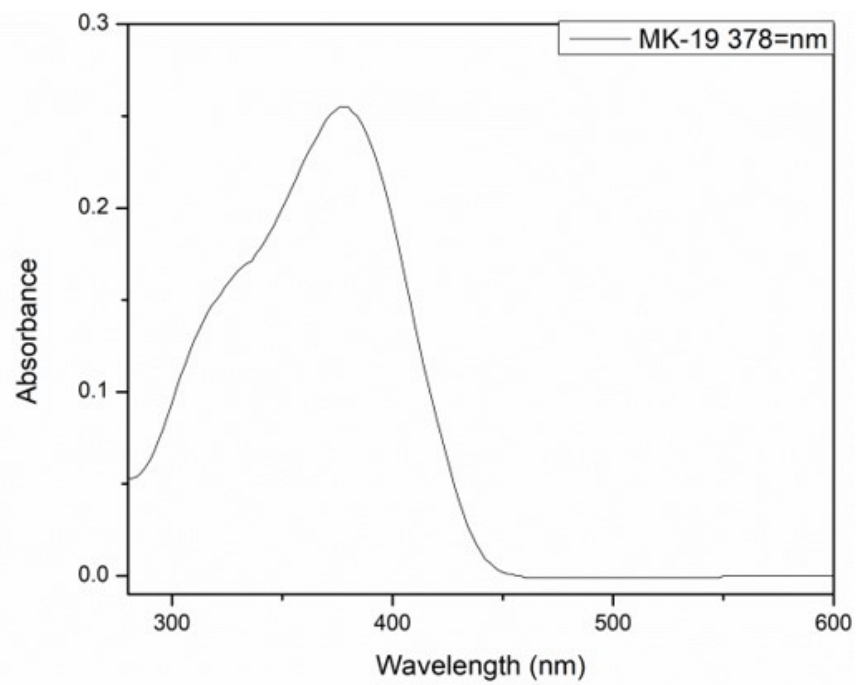

**Figure S32: UV-Visible Spectra of ND6**

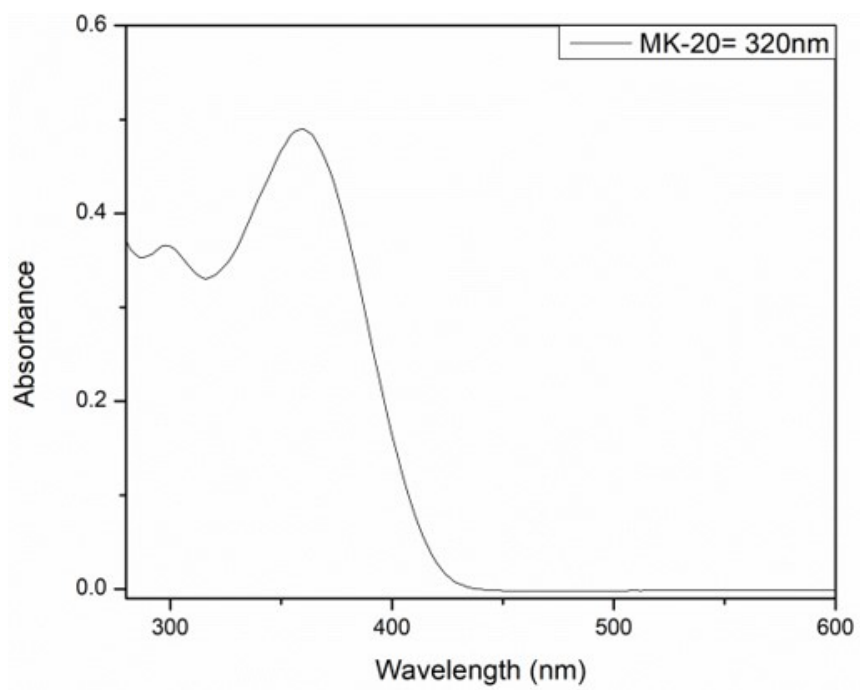

**Figure S33: UV-Visible Spectra of ND7**

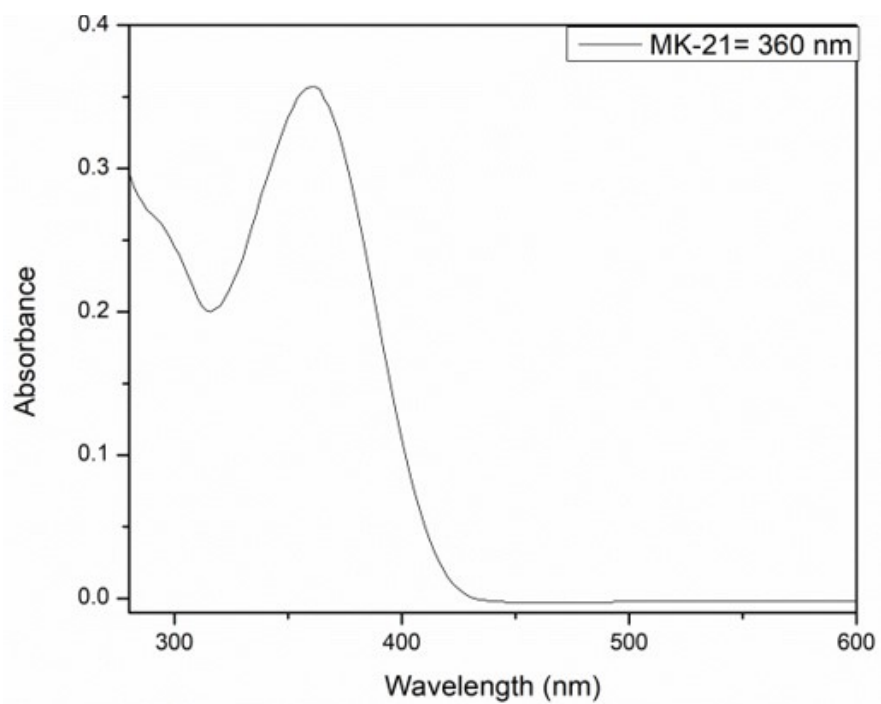

**Figure S34: UV-Visible Spectra of ND8**

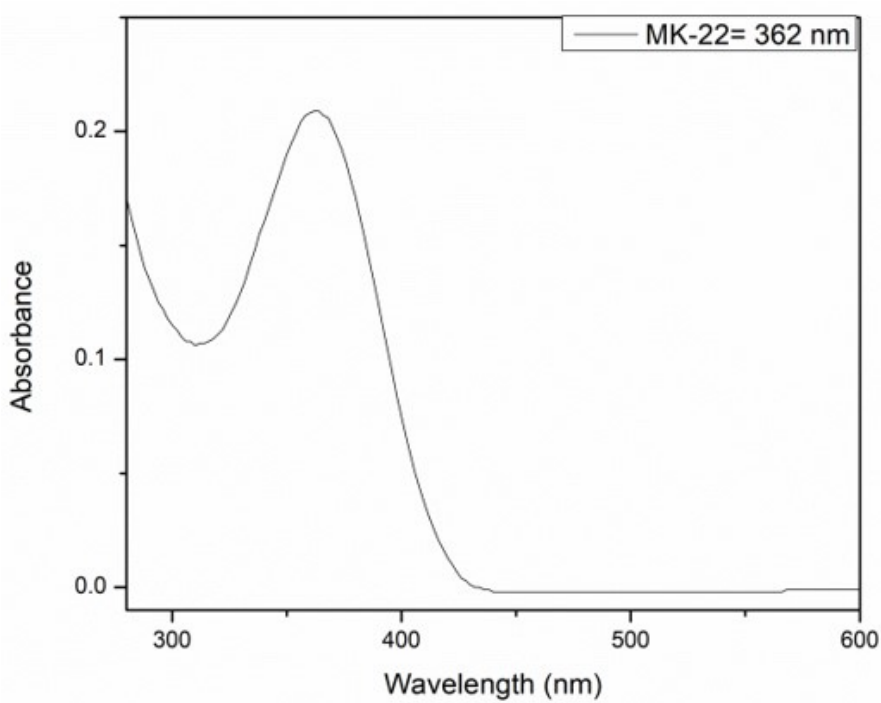

**Figure S35: UV-Visible Spectra of ND9**

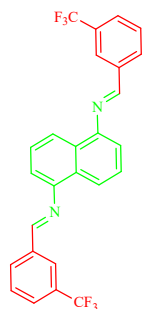

**ND1**

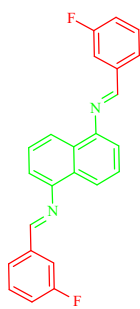

**ND2**

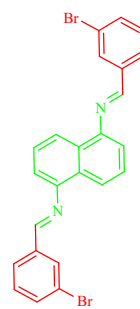

**ND3**

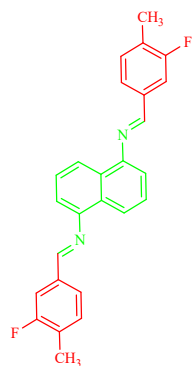

**ND4**

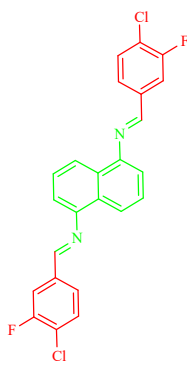

**ND5**

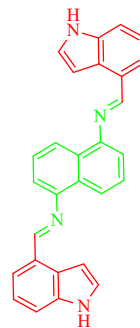

**ND6**

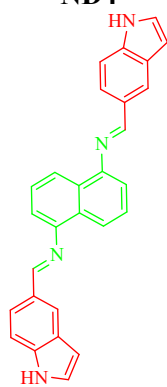

**ND7**

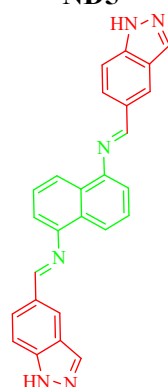

**ND8**

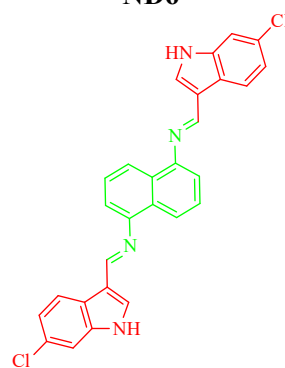

**ND9**

**Figure S36:** ChemDraw sketches of ND1-ND9 compounds.

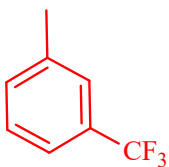

1-methyl-3-(trifluoromethyl)benzene  
**A1**

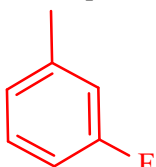

1-fluoro-3-methylbenzene  
**A2**

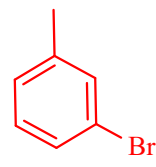

1-bromo-3-methylbenzene  
**A3**

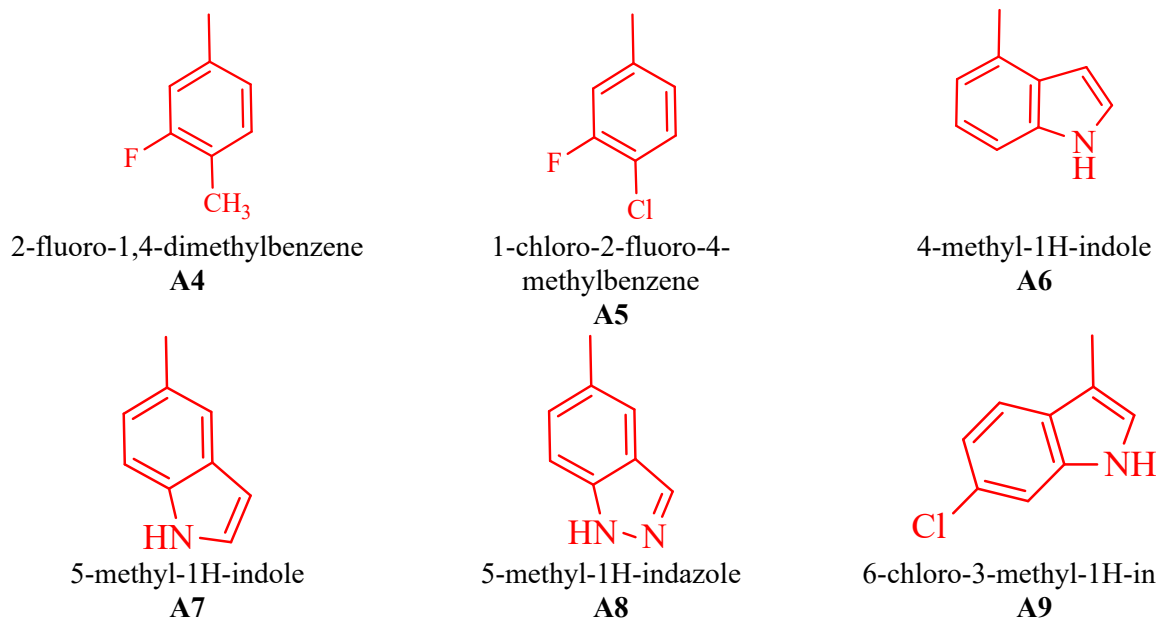

**Figure S37:** The structures of various acceptors with IUPAC names used in the synthesized chromophores.

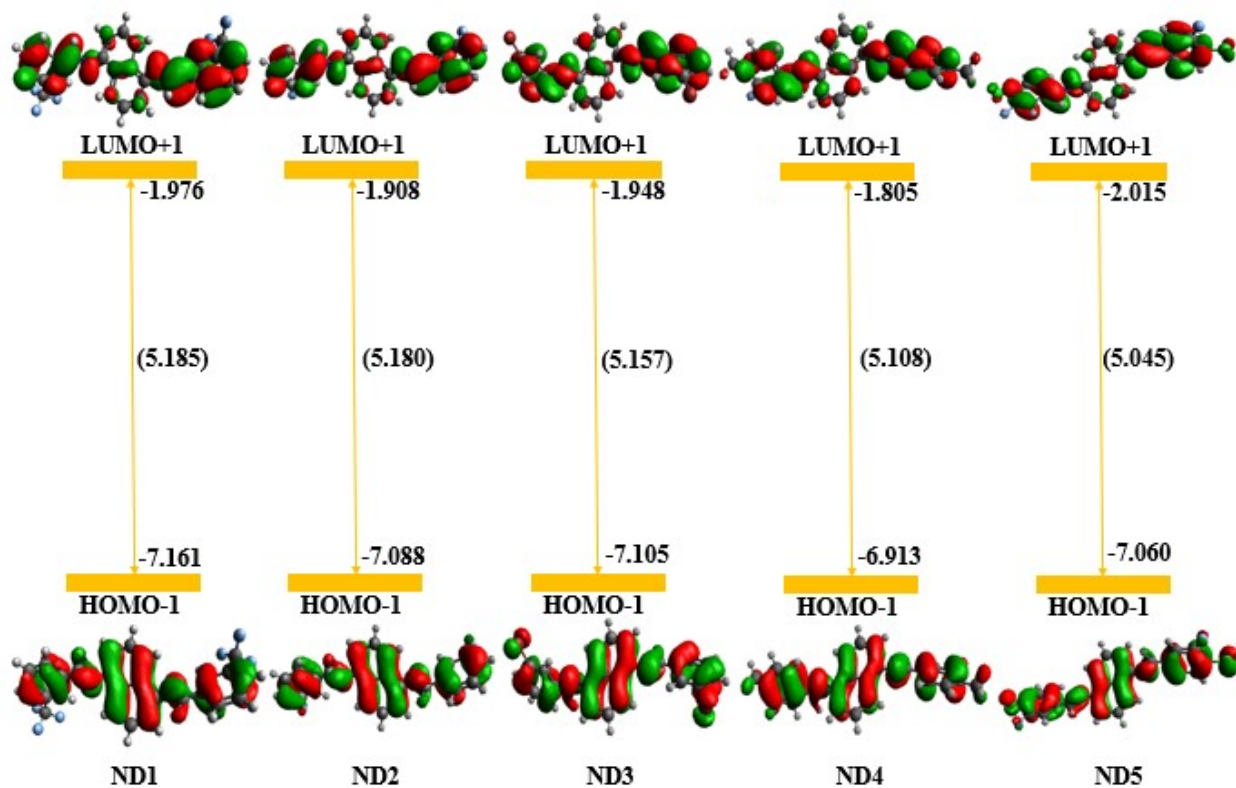

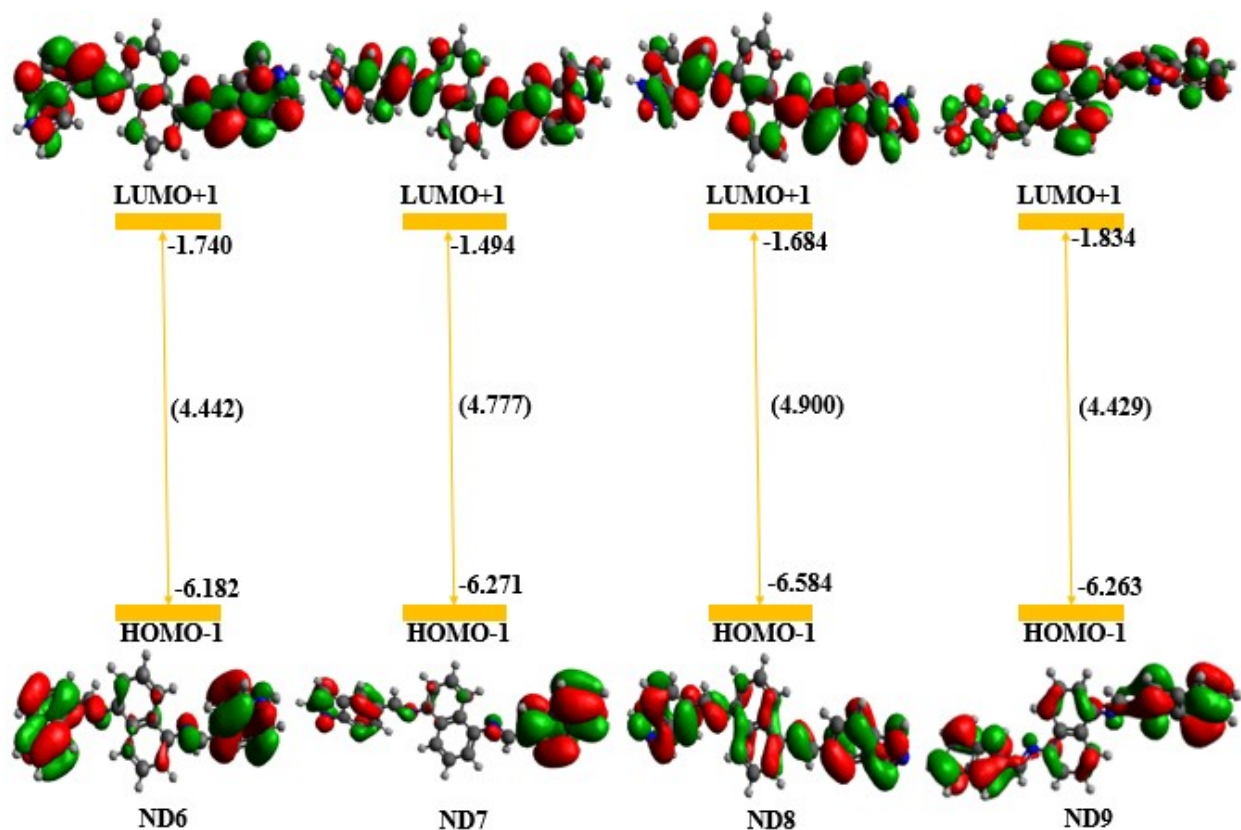

Figure S38: Frontier molecular orbitals HOMO+1/LUMO+1 of all synthesized chromophores.

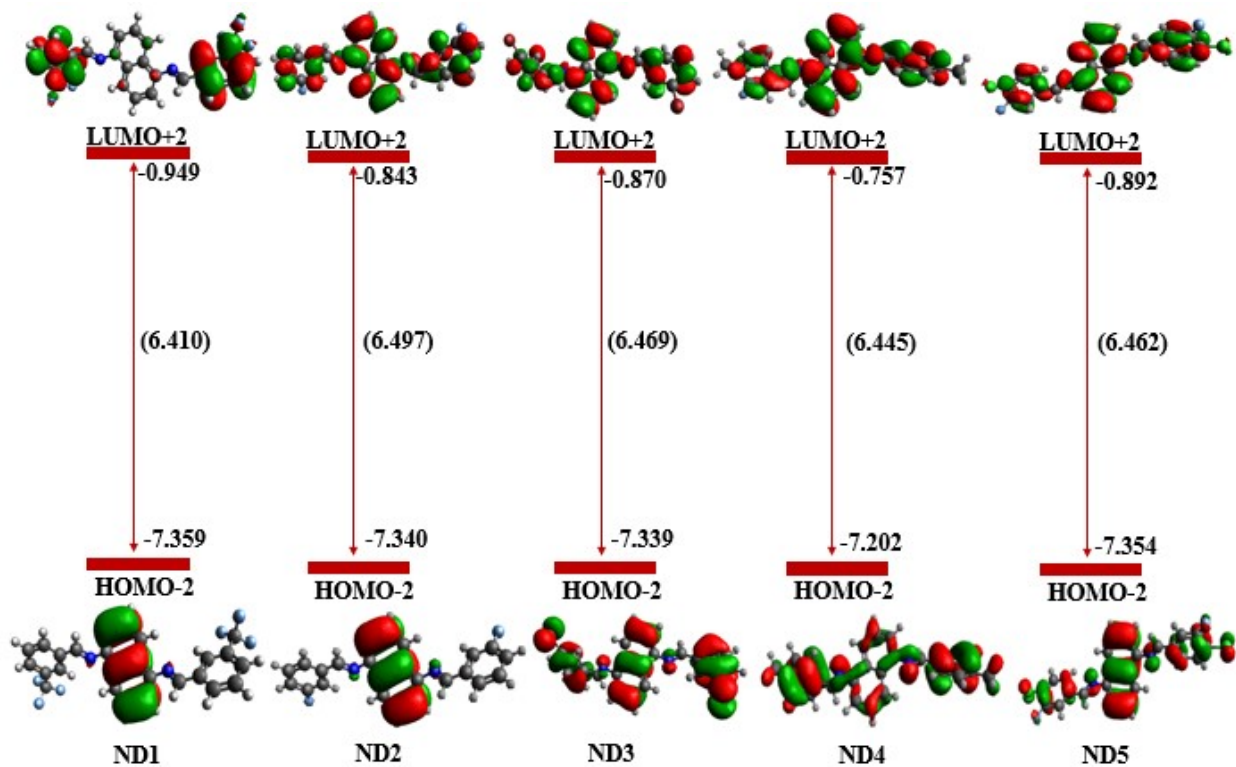

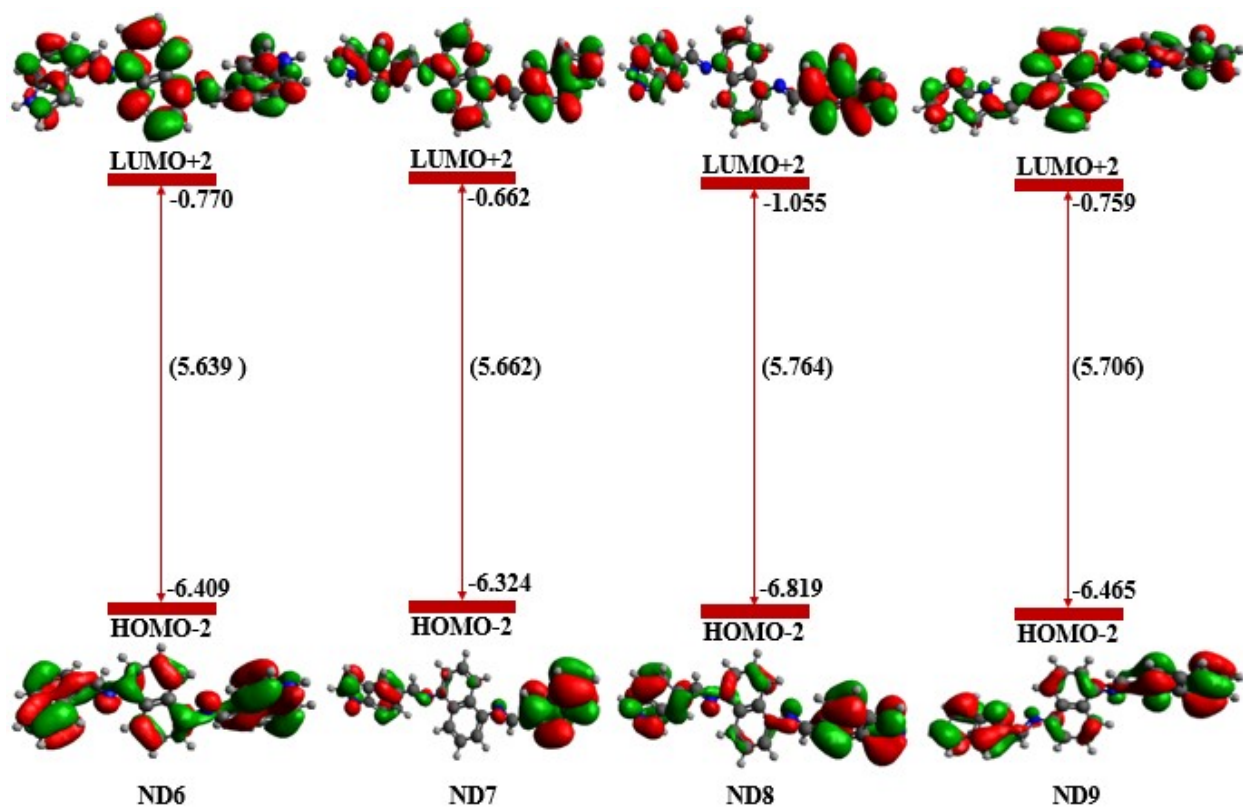

Figure S39: Frontier molecular orbitals HOMO+2/LUMO+2 of all synthesized chromophores.

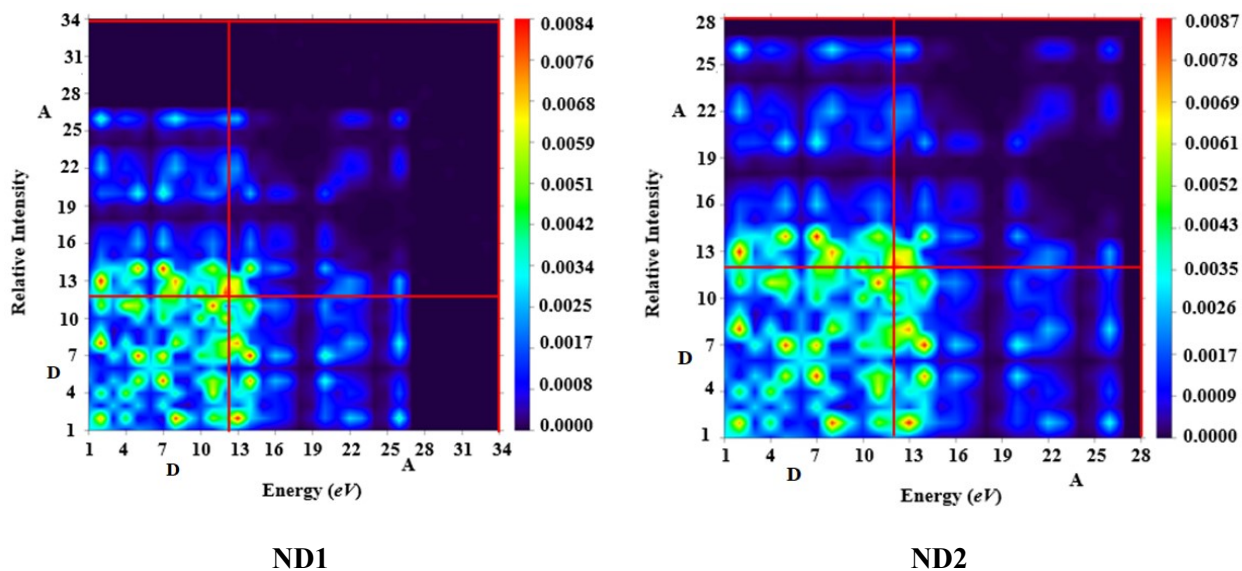

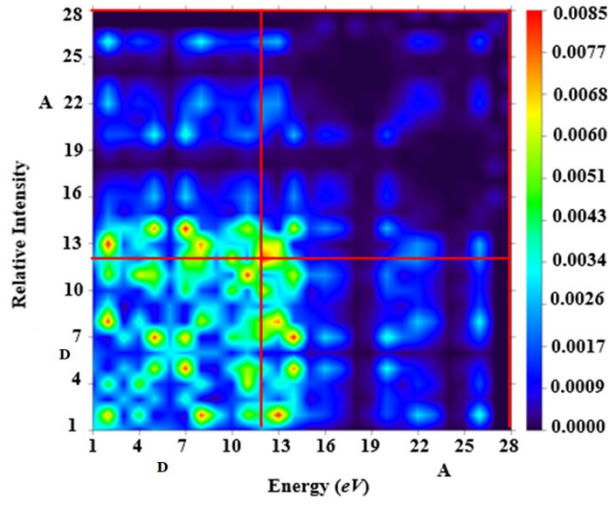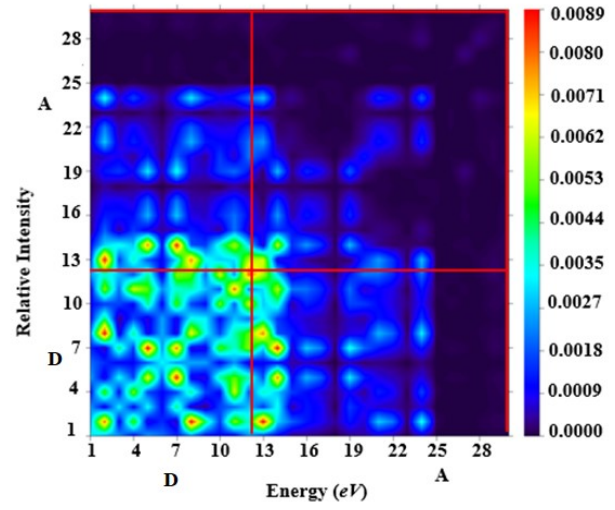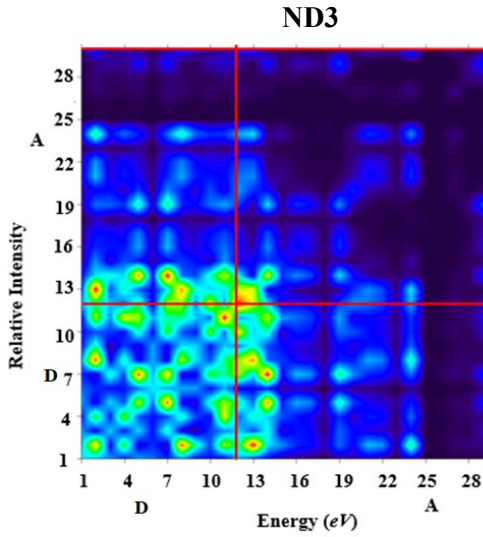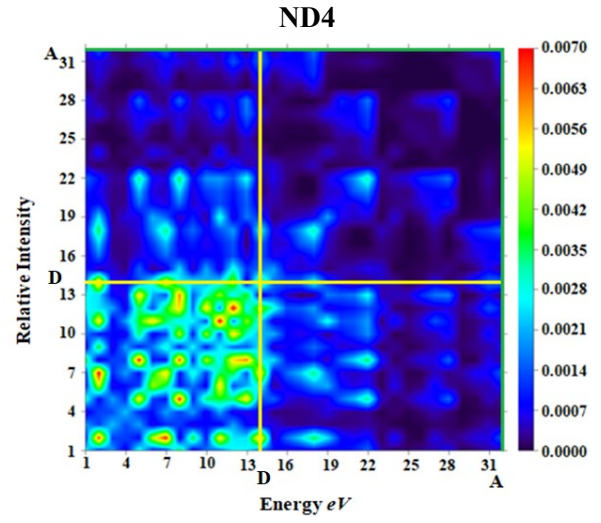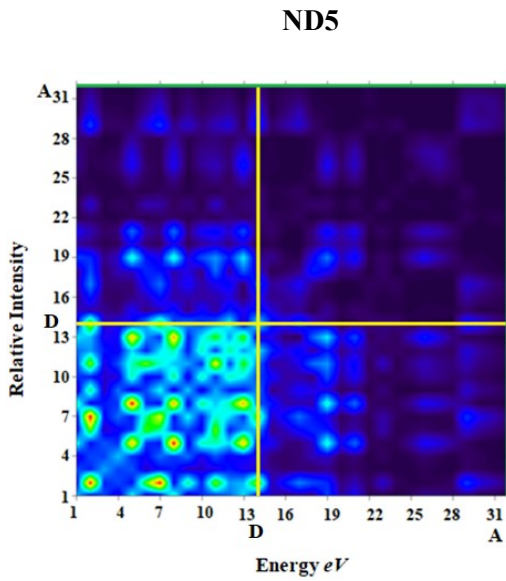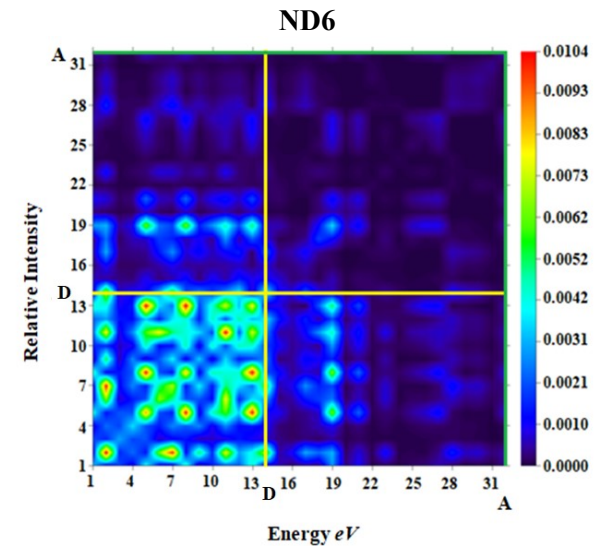



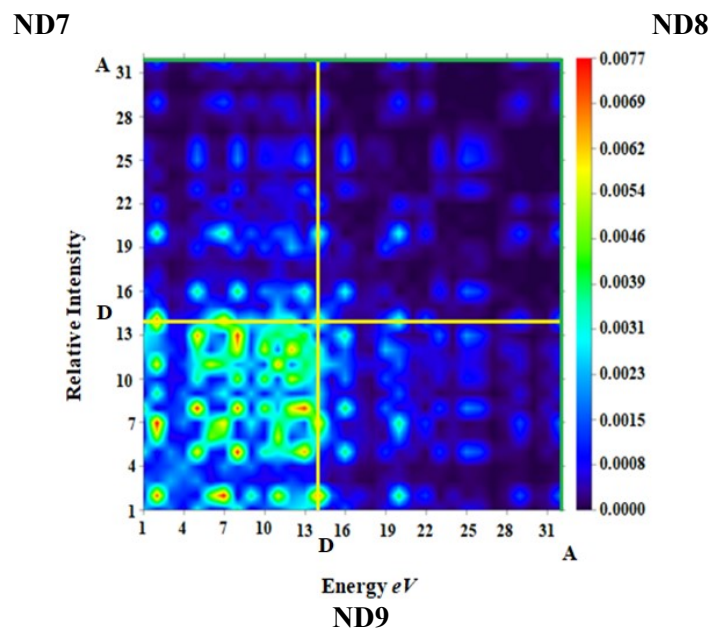

Figure S40: Transition density maps of all synthesized chromophores ND1-ND9.

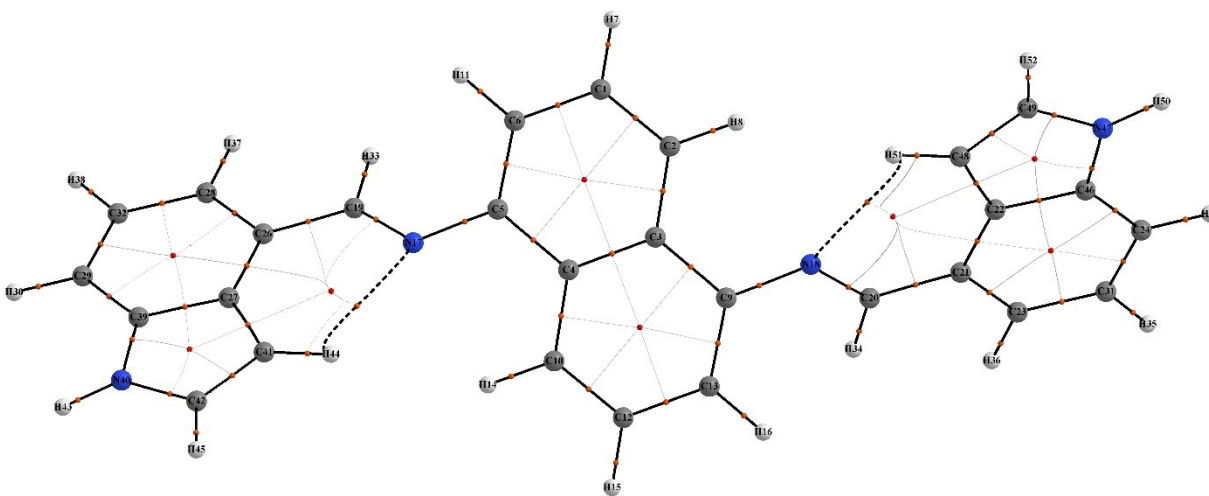

Figure S41. Schematic structure of AIM analysis of MN6.
